# Supplementary material
Source: PubMed Central journal article supplement (PMC2737076)

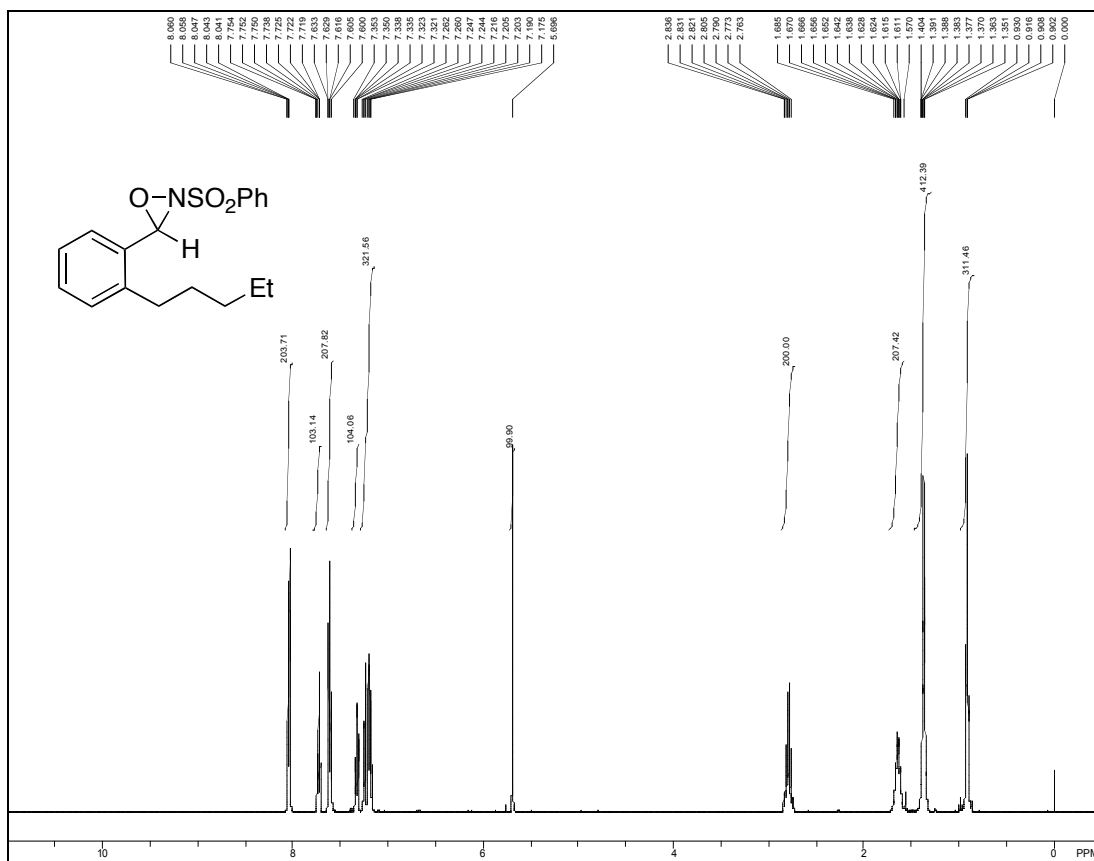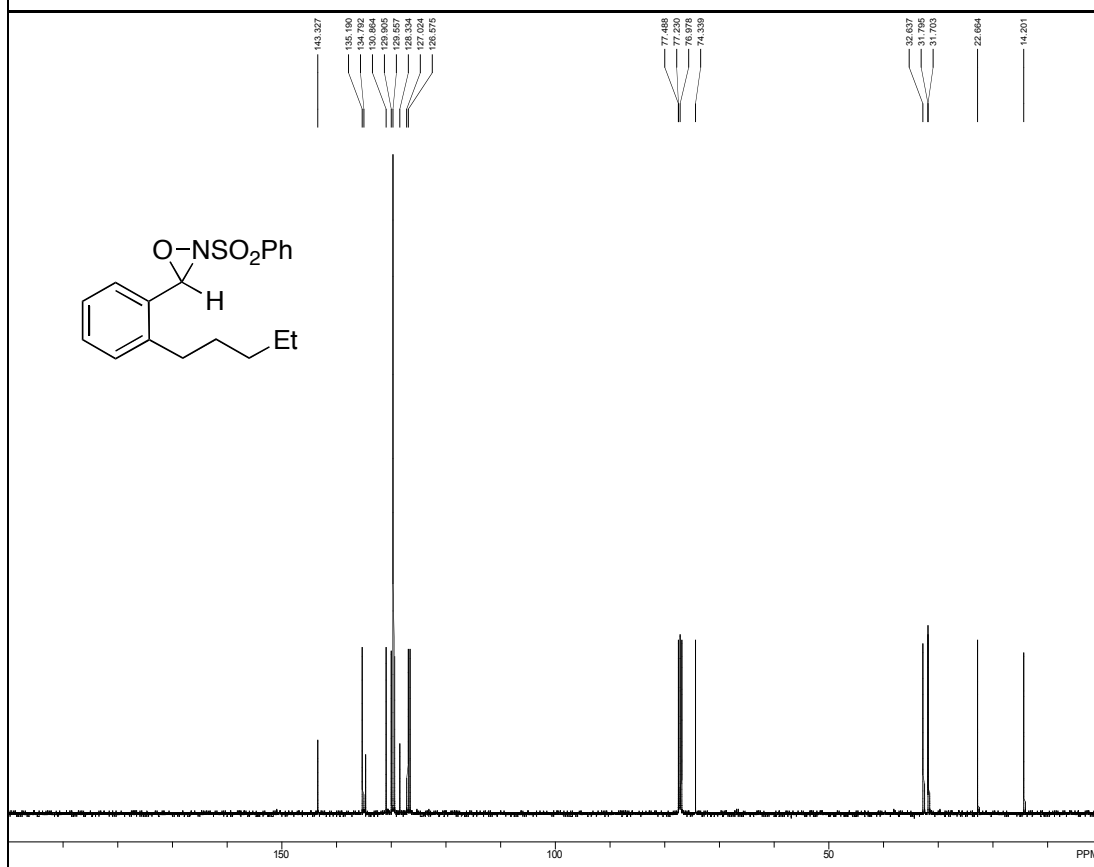

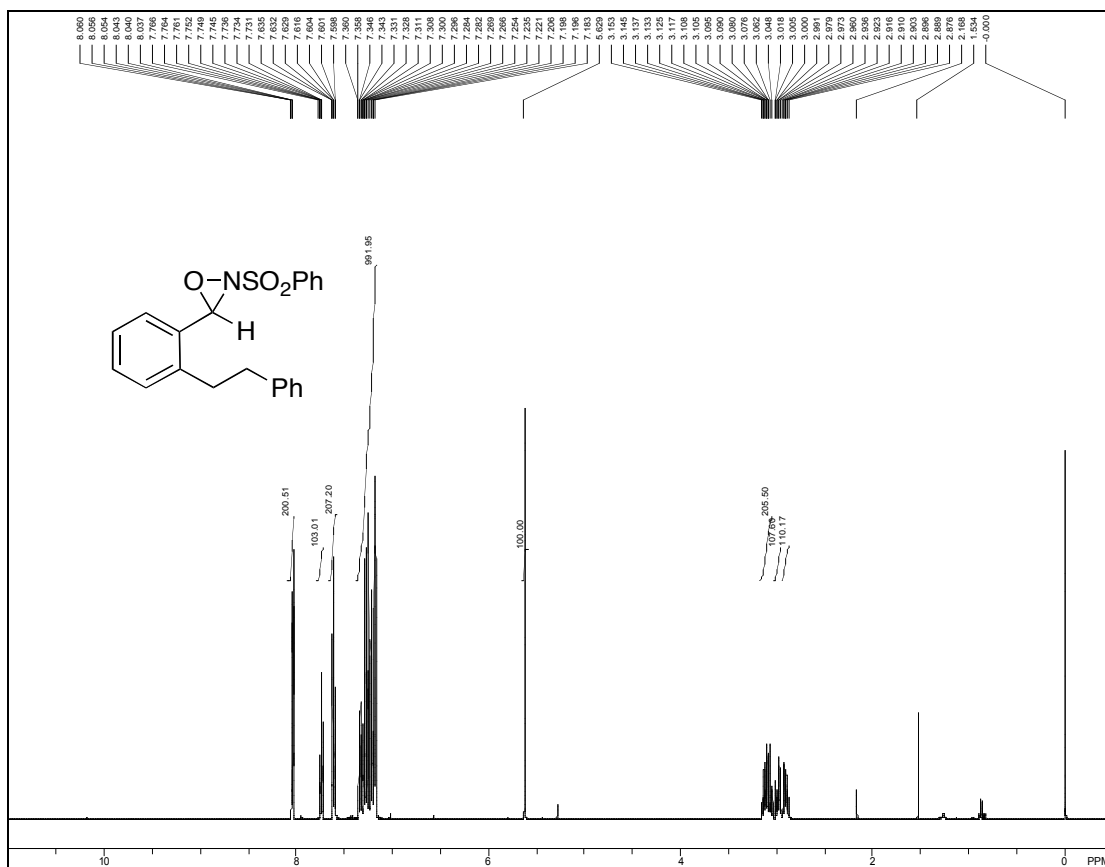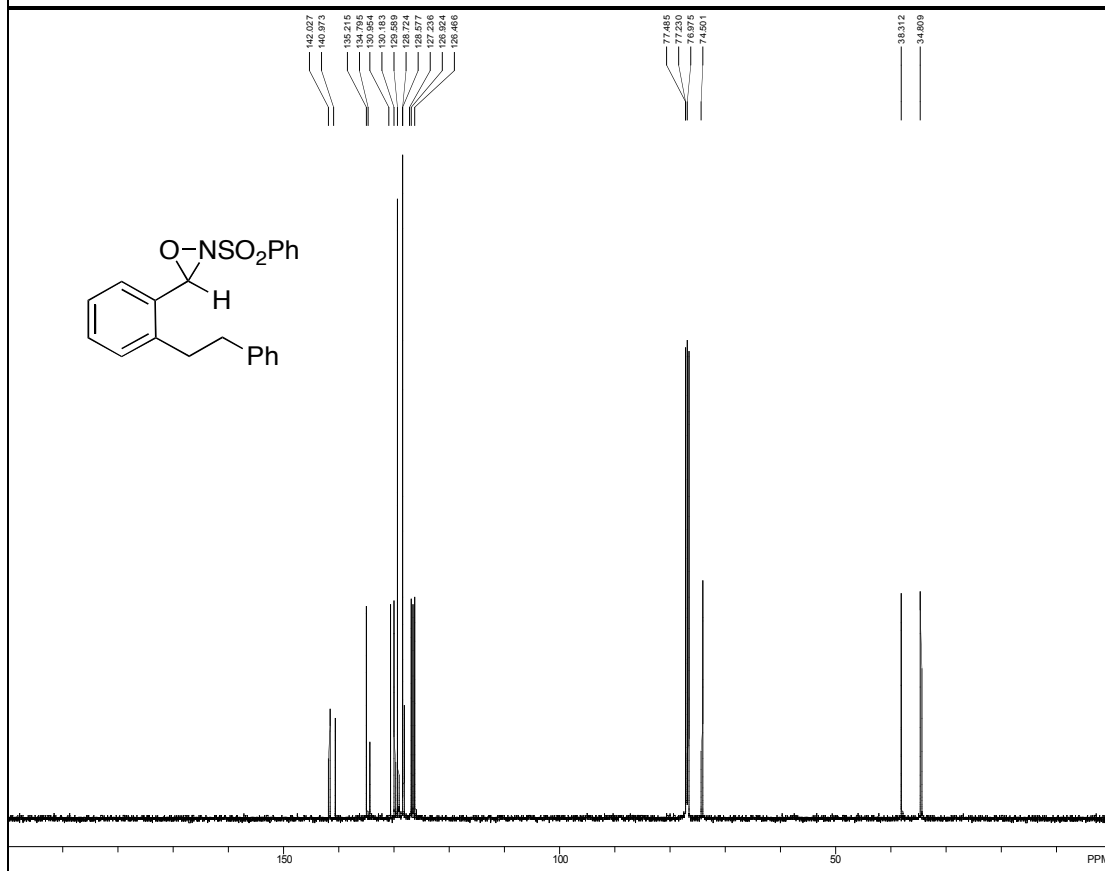

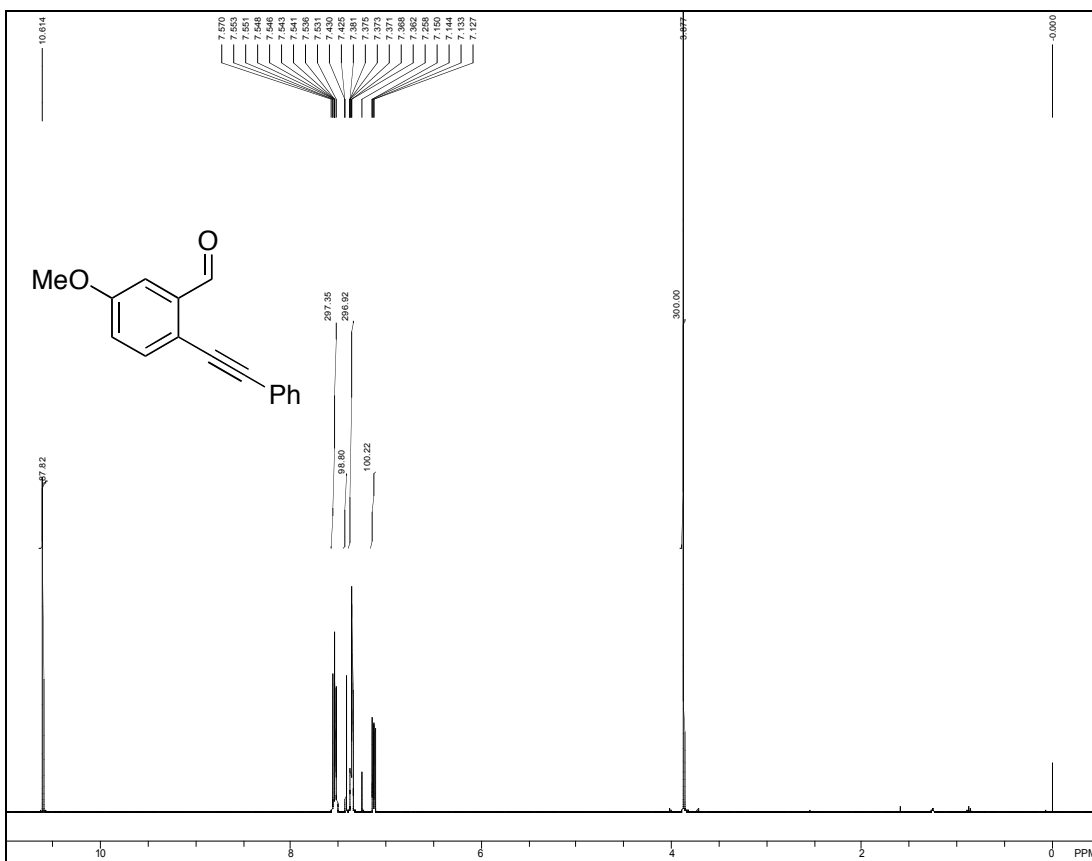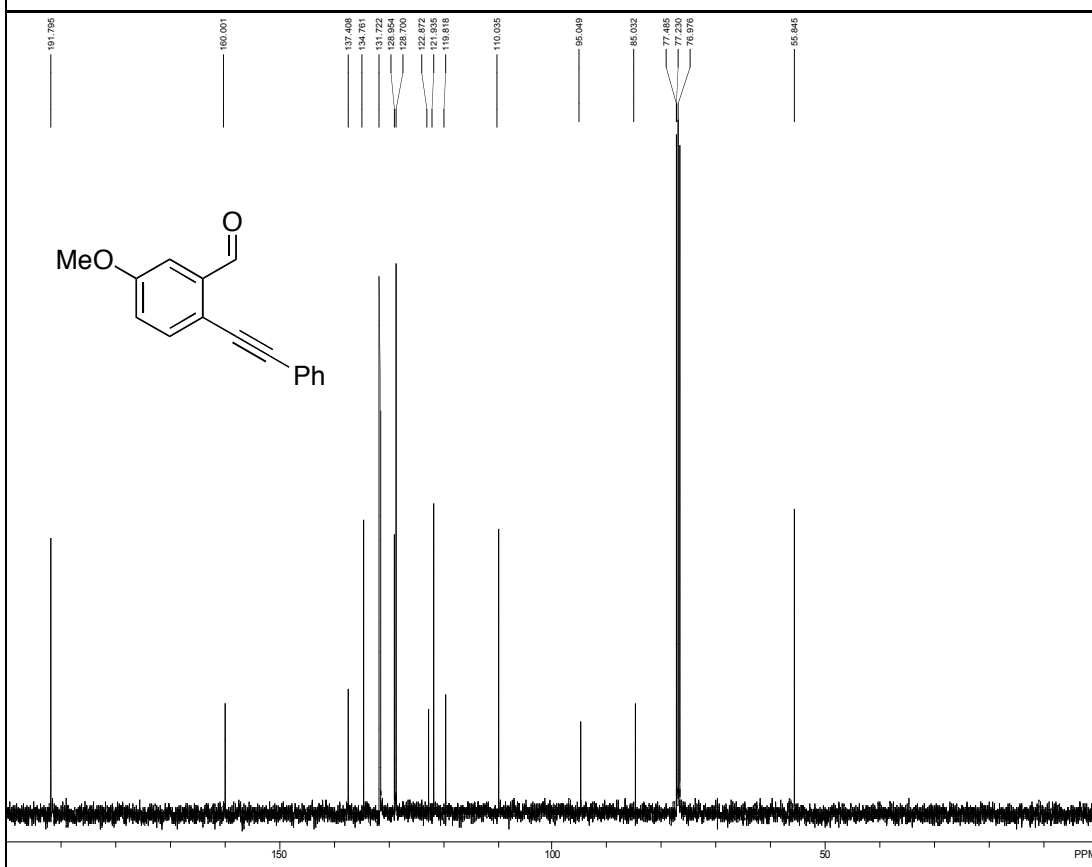

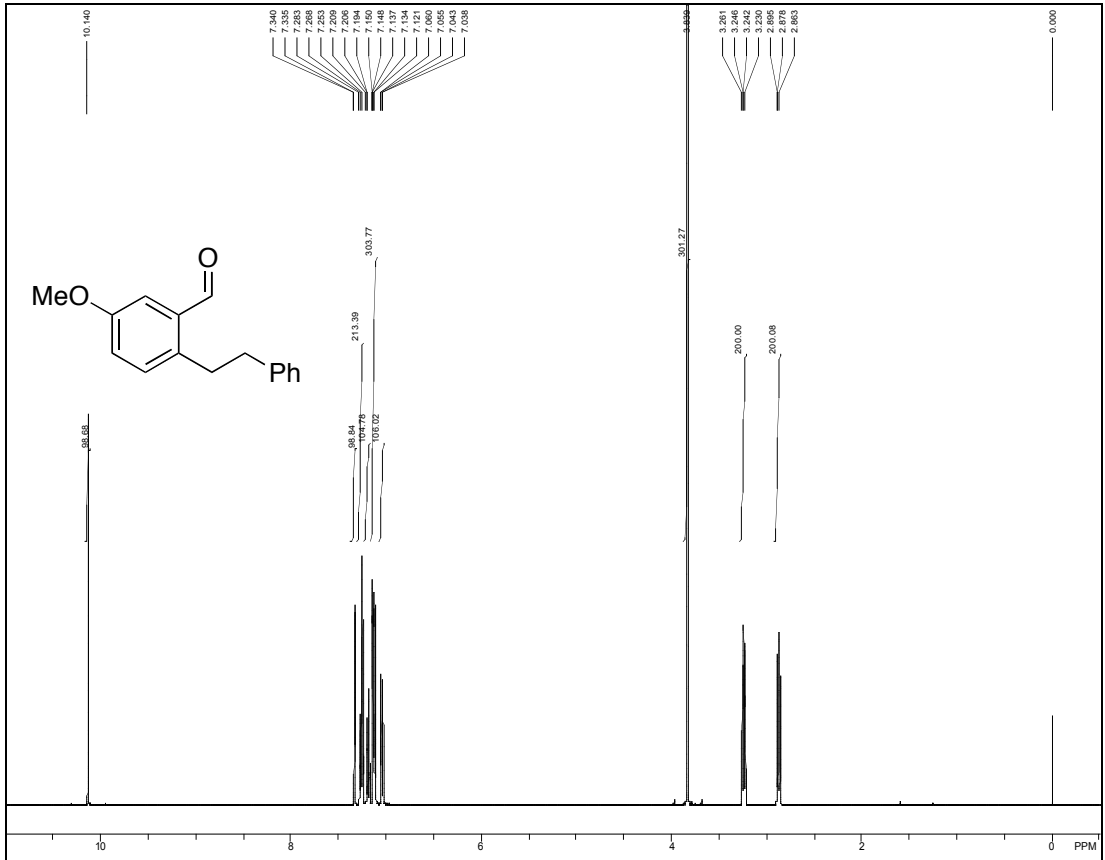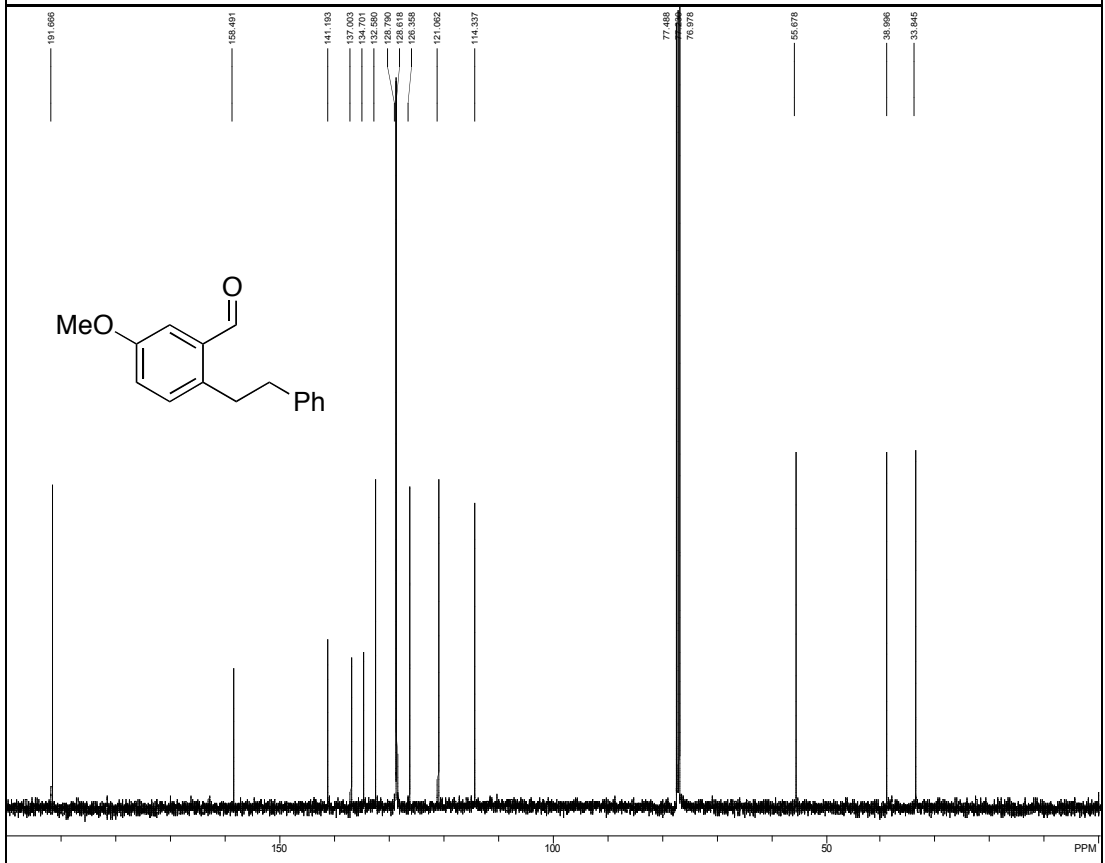

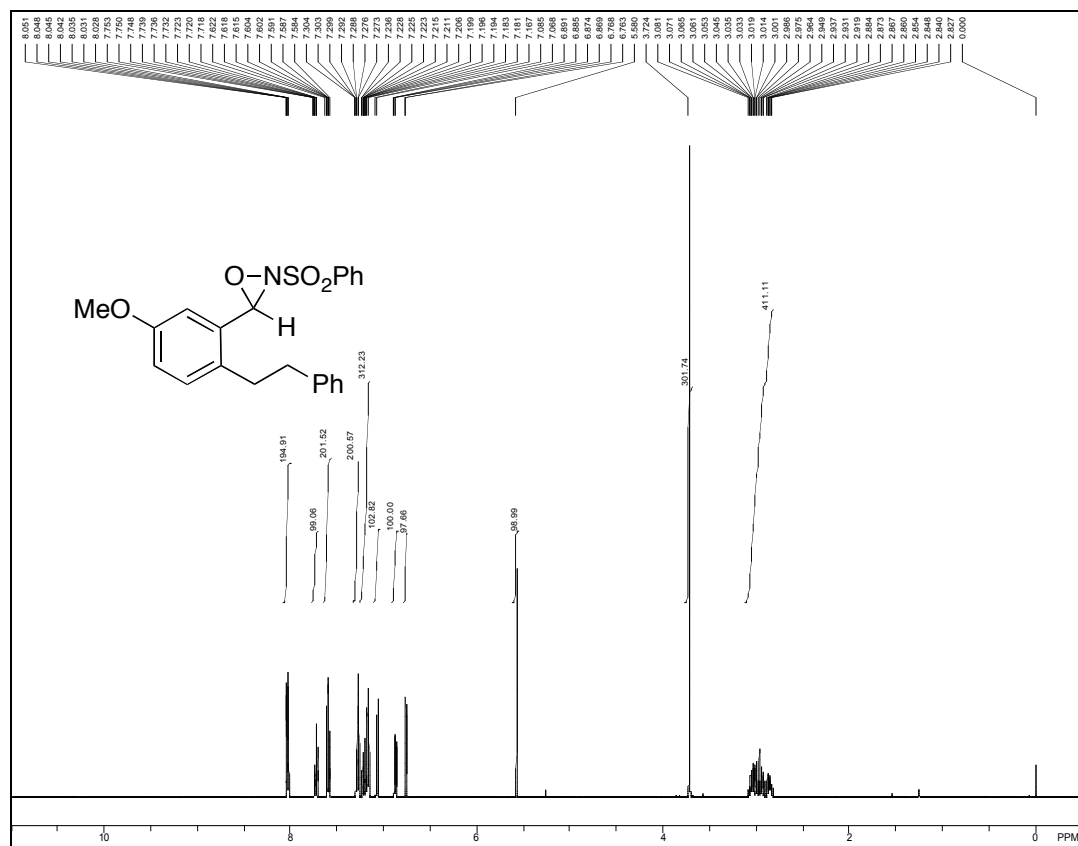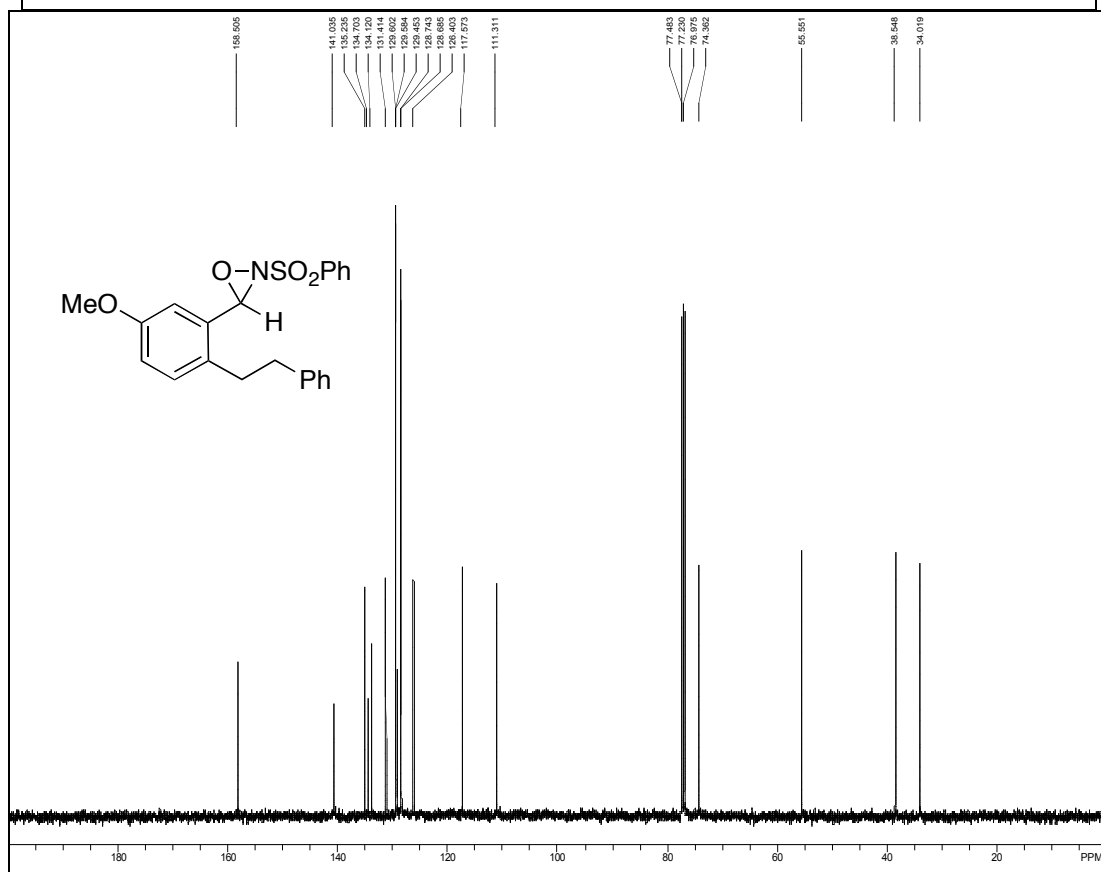

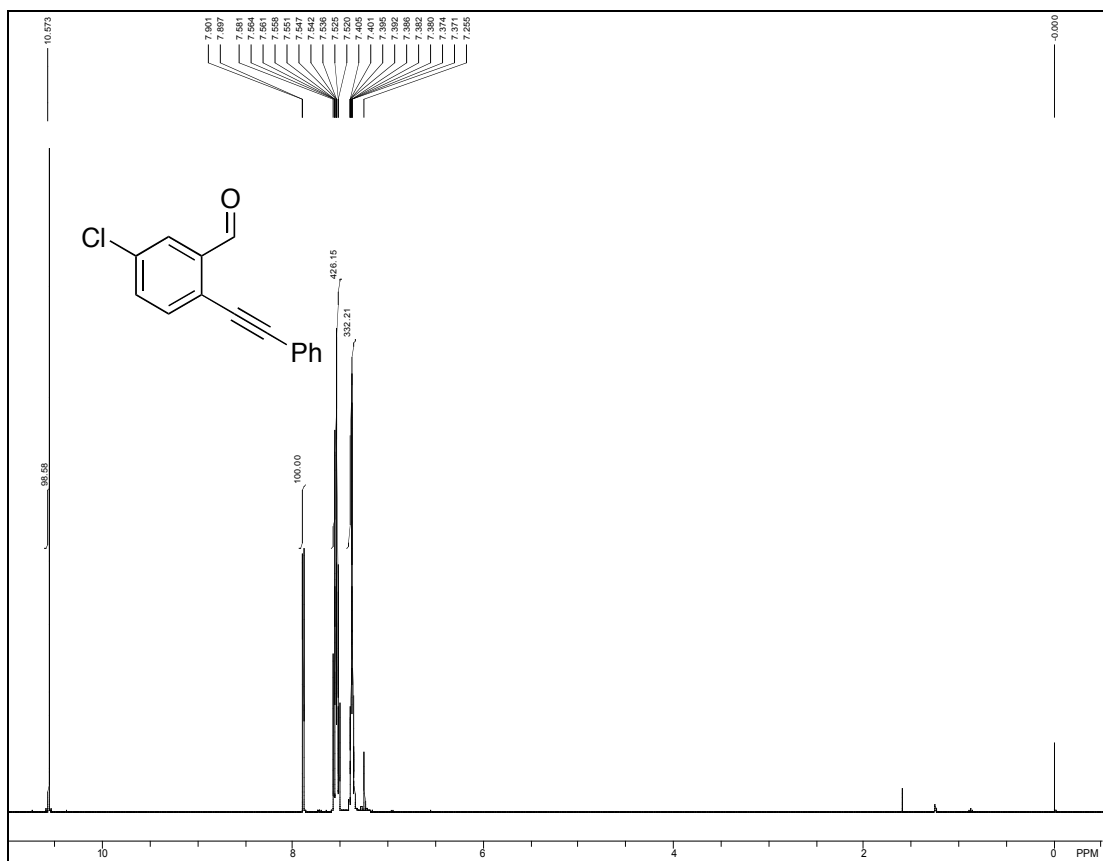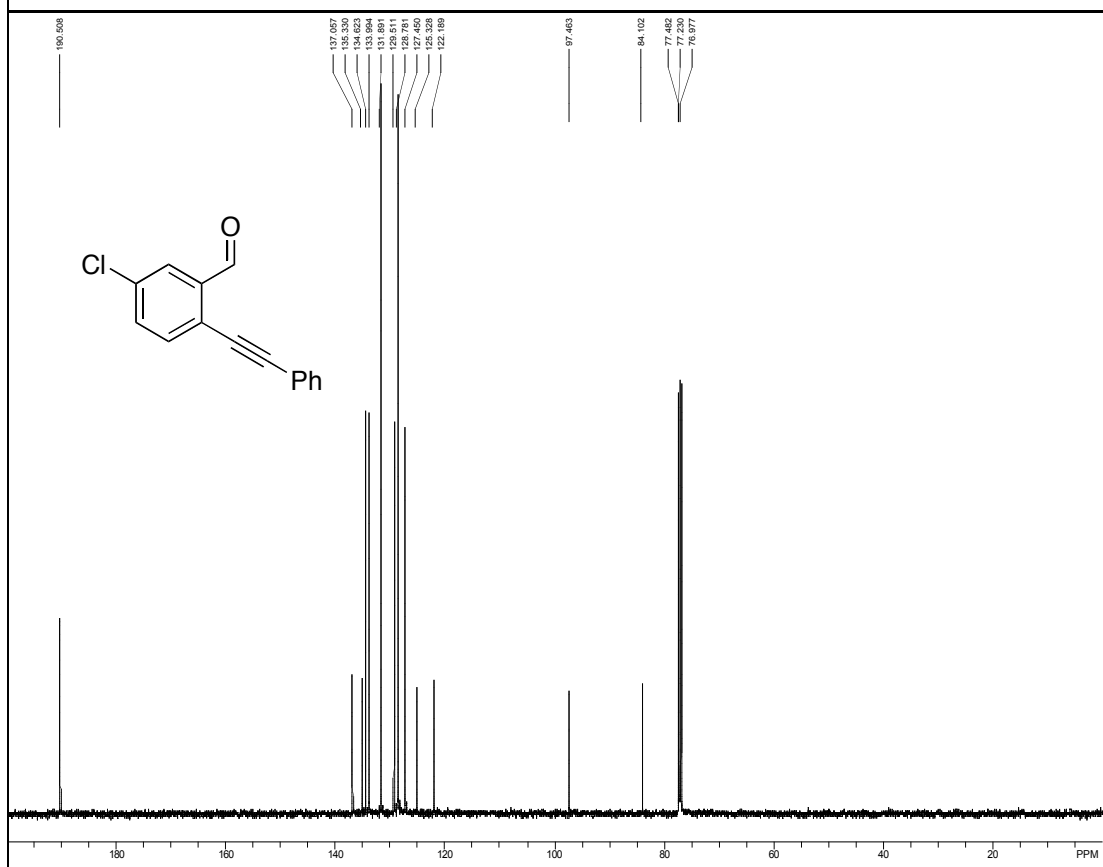

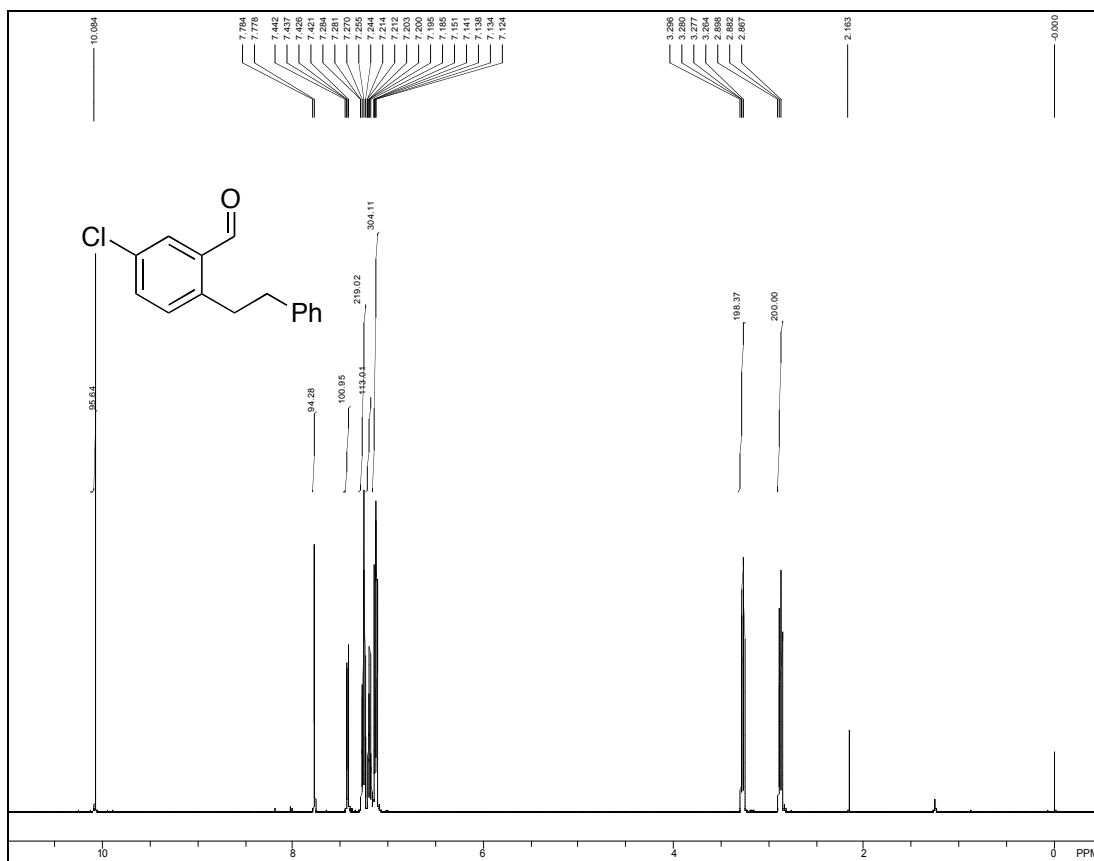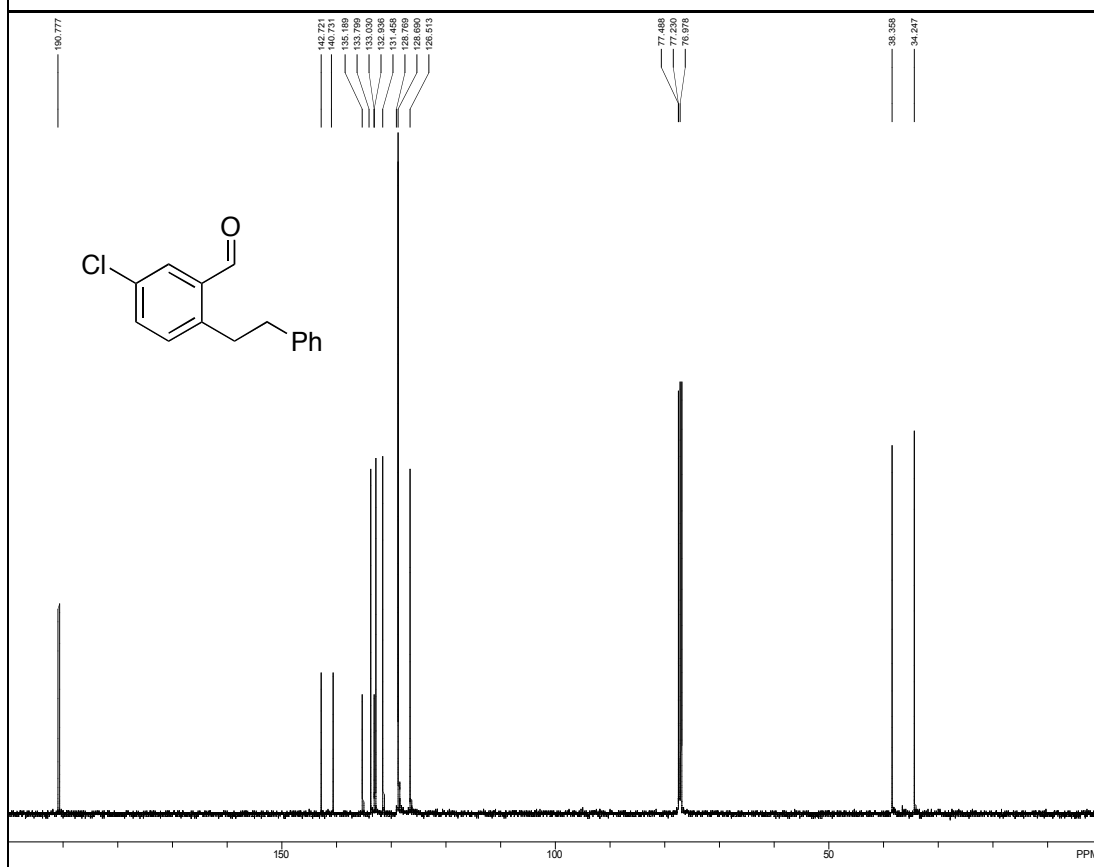

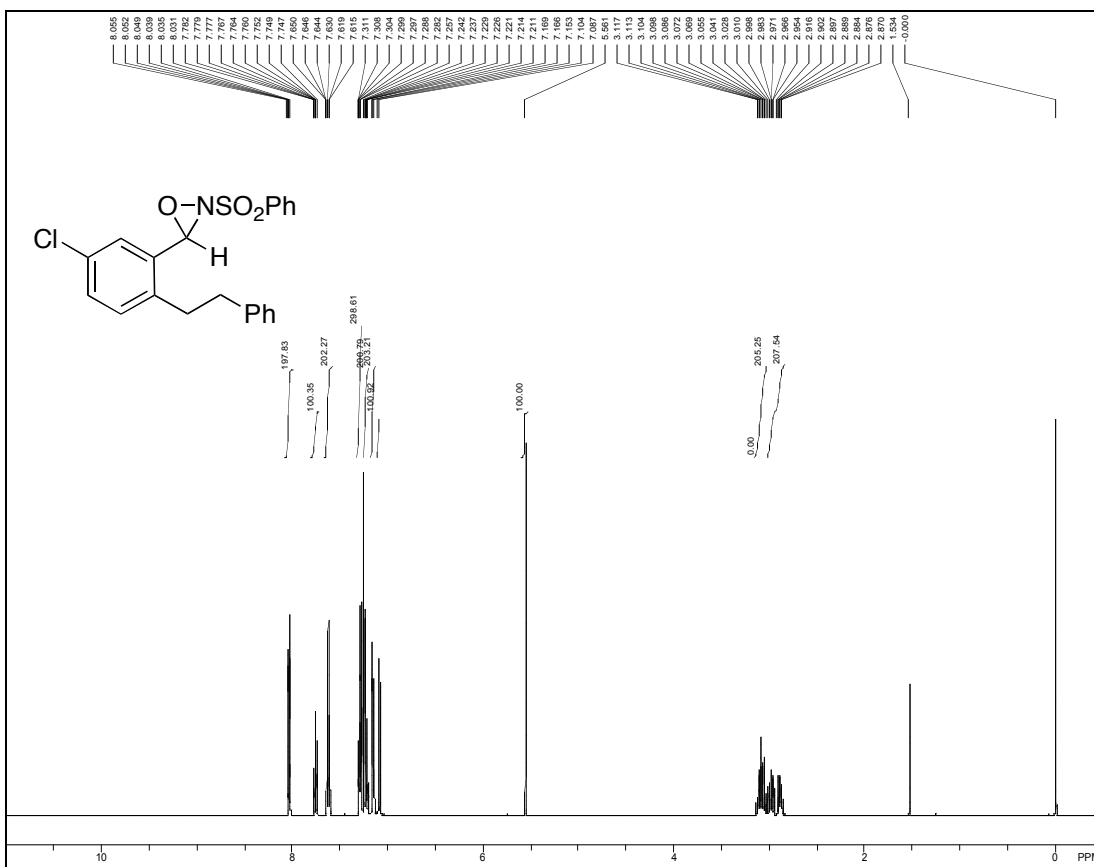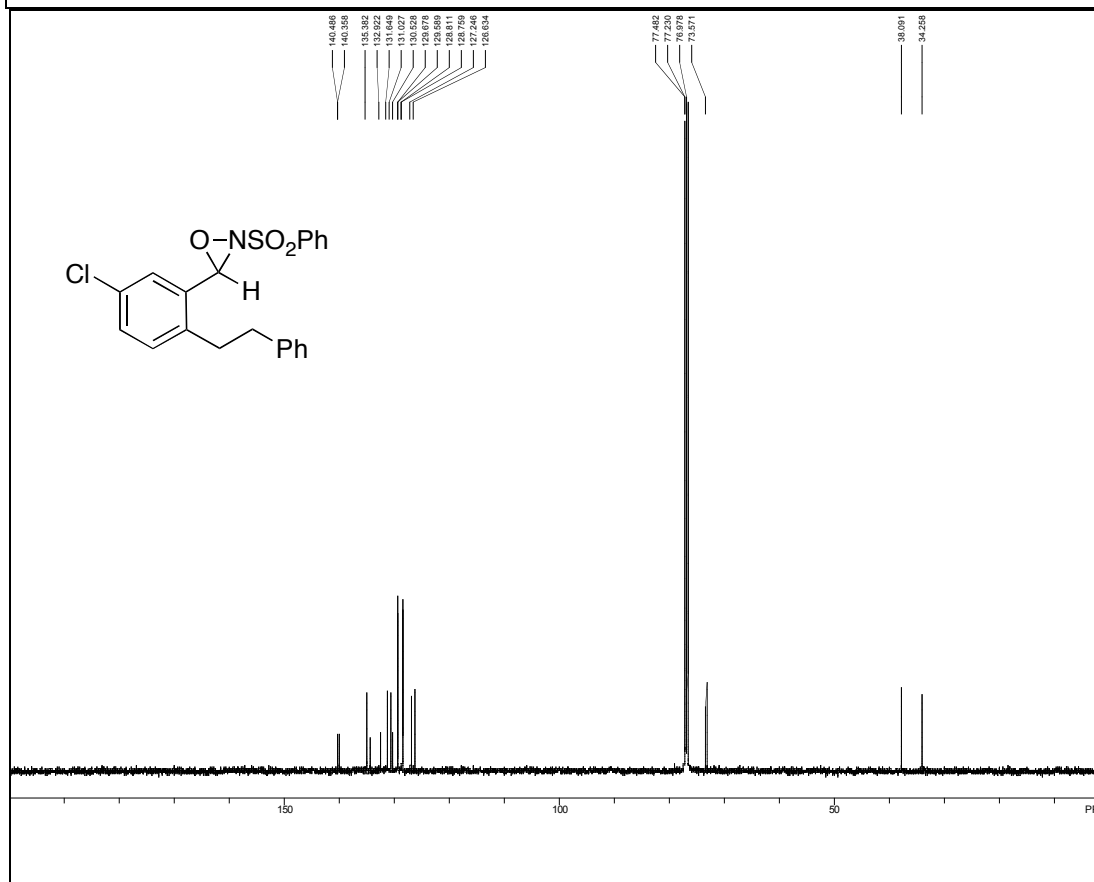



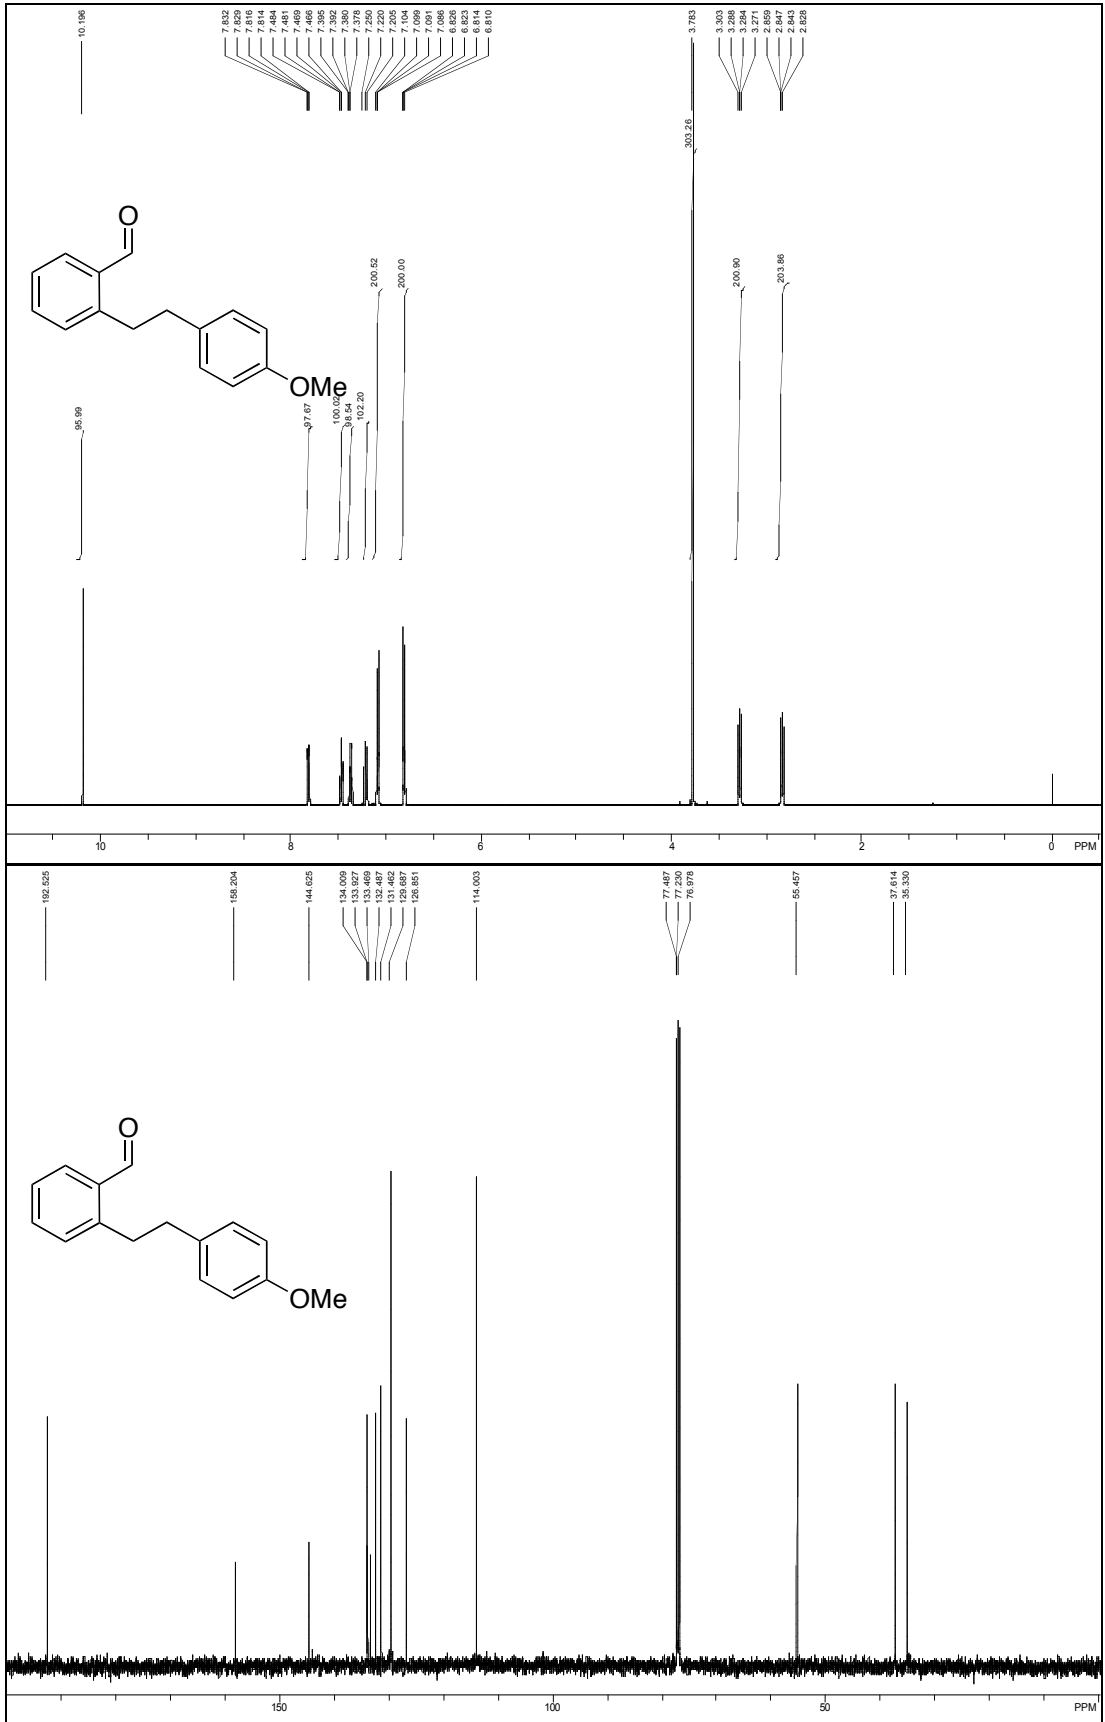

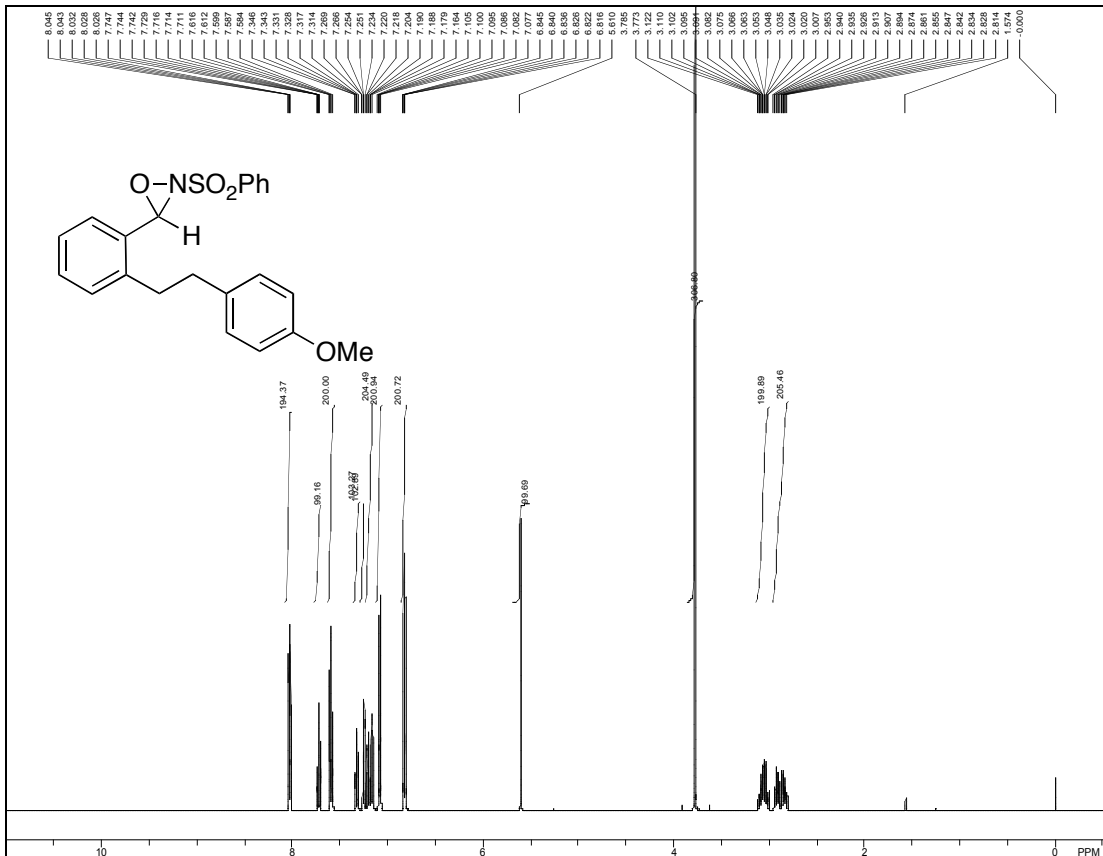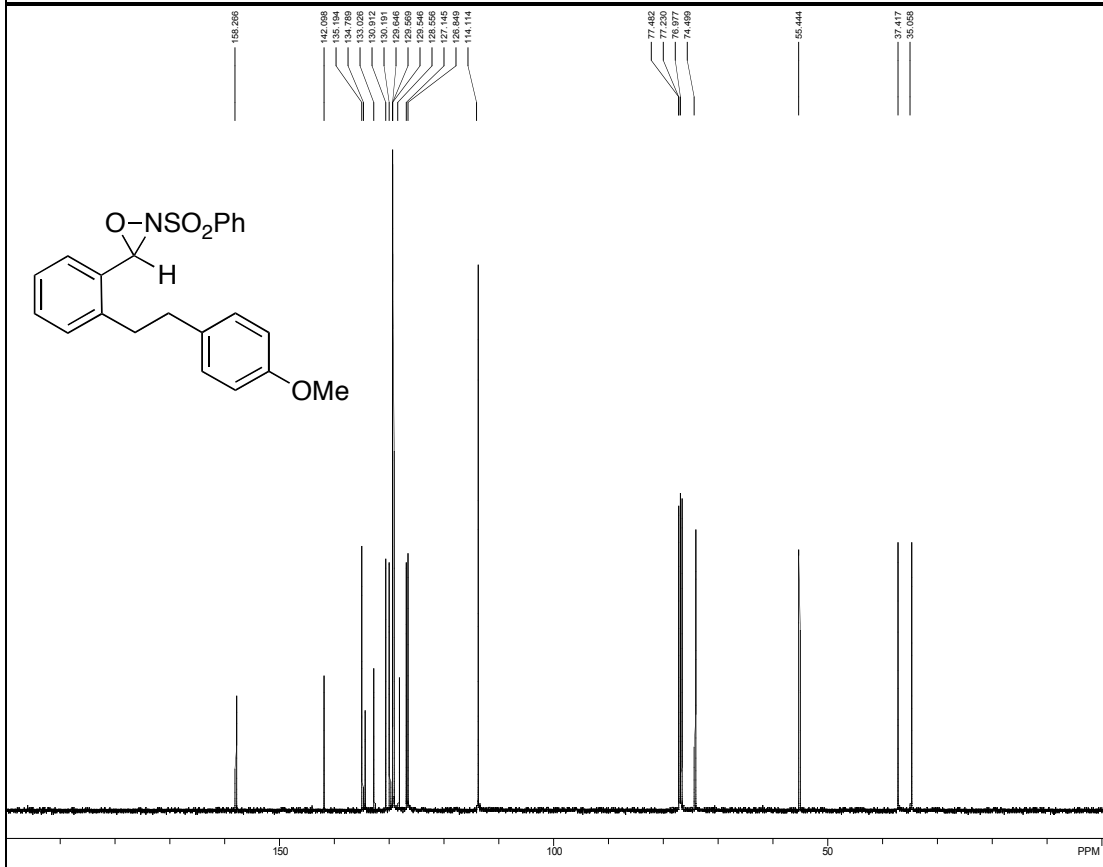

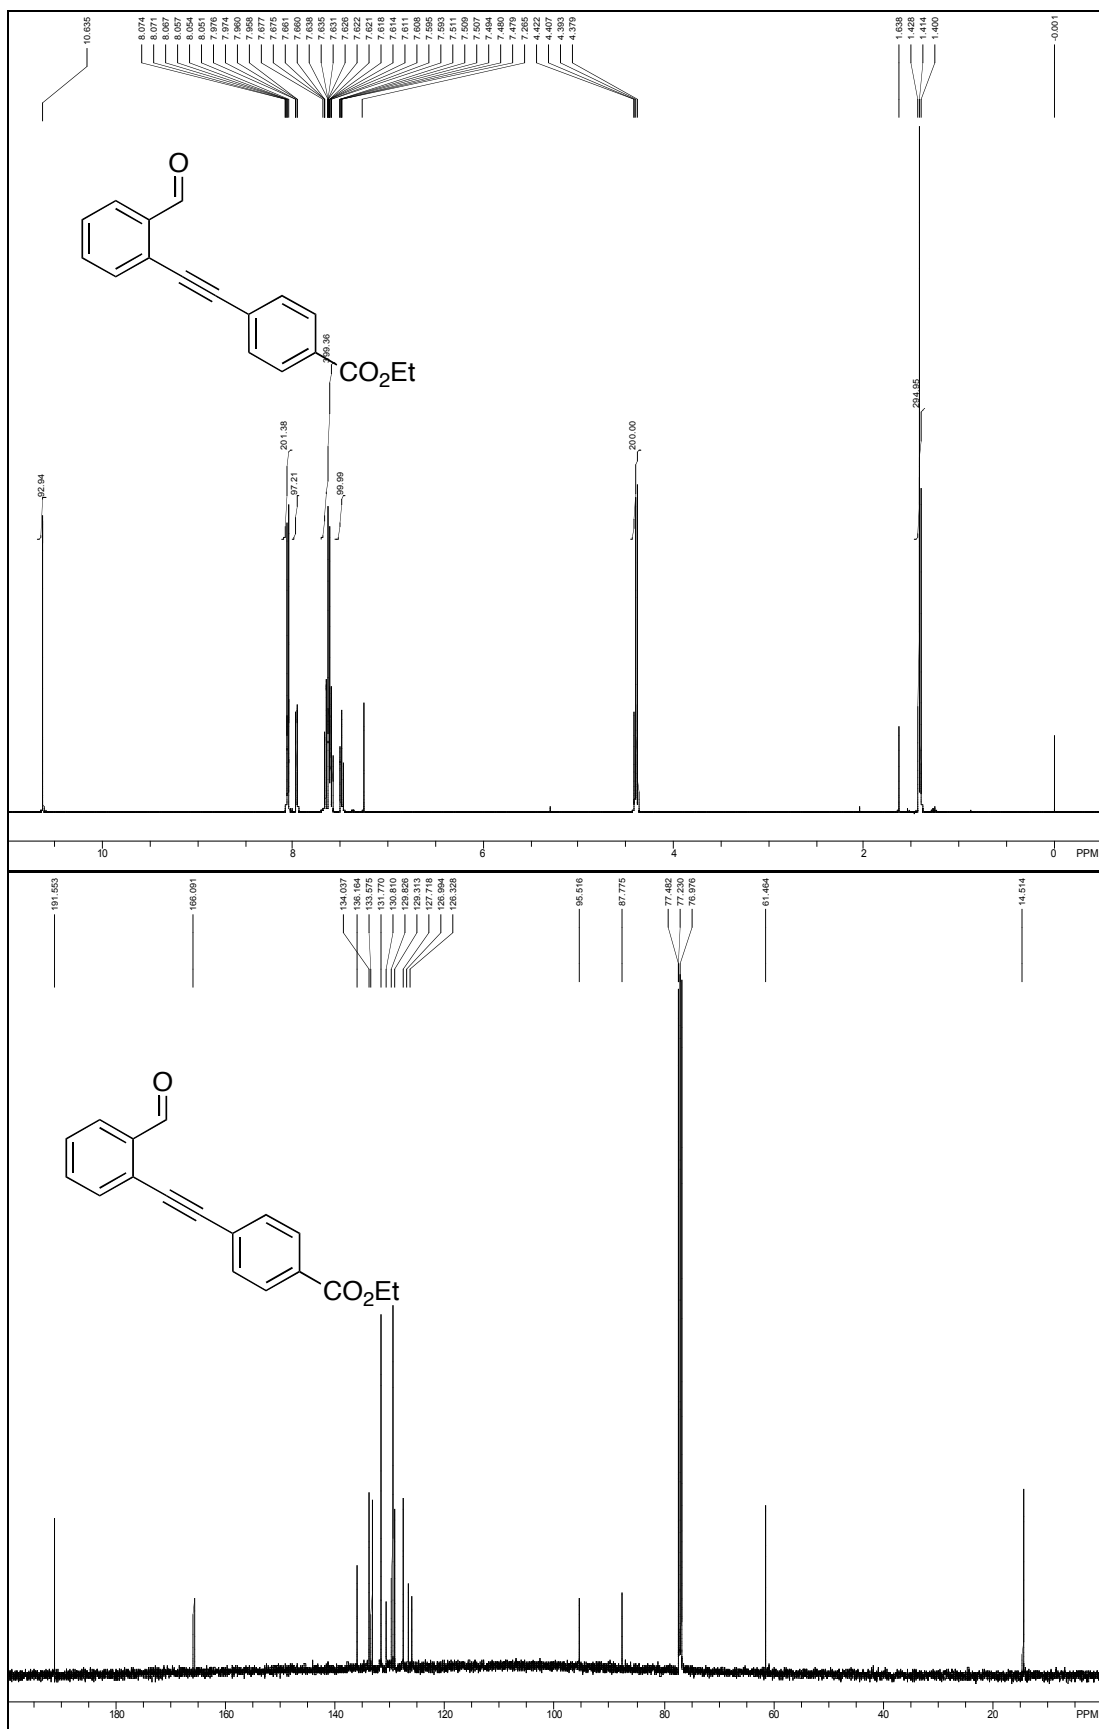

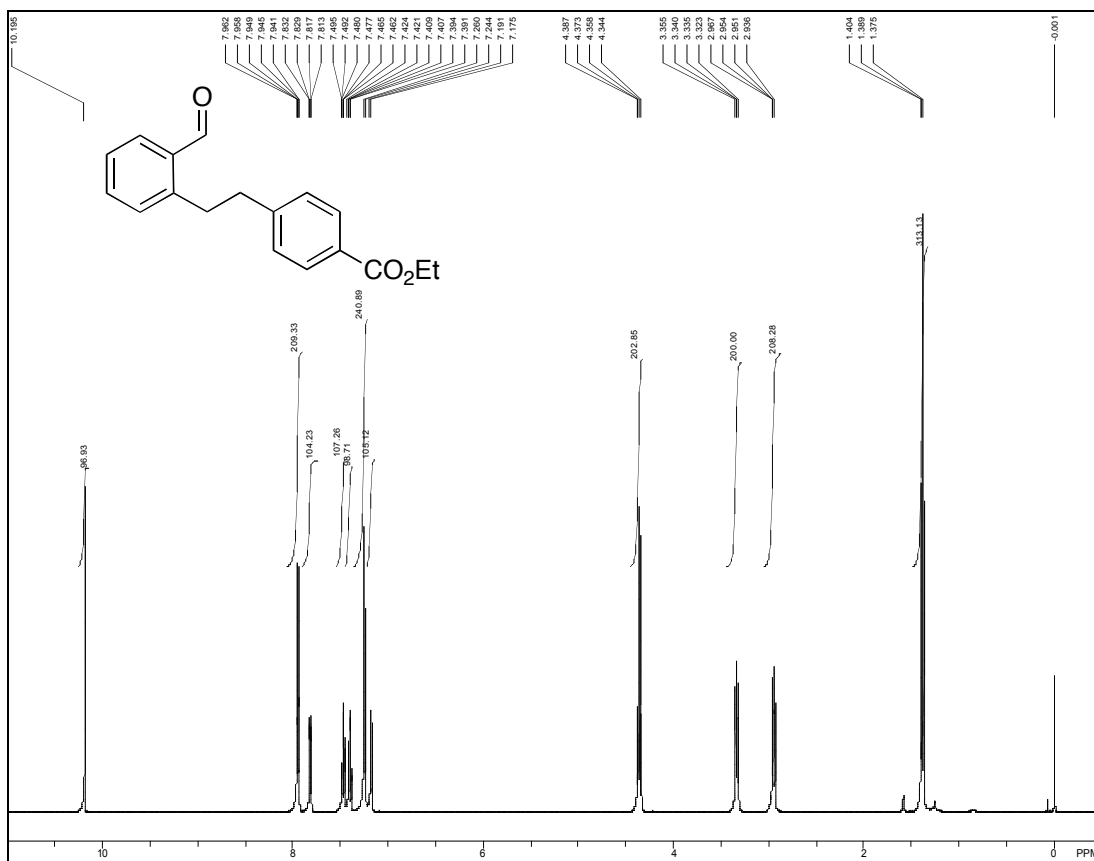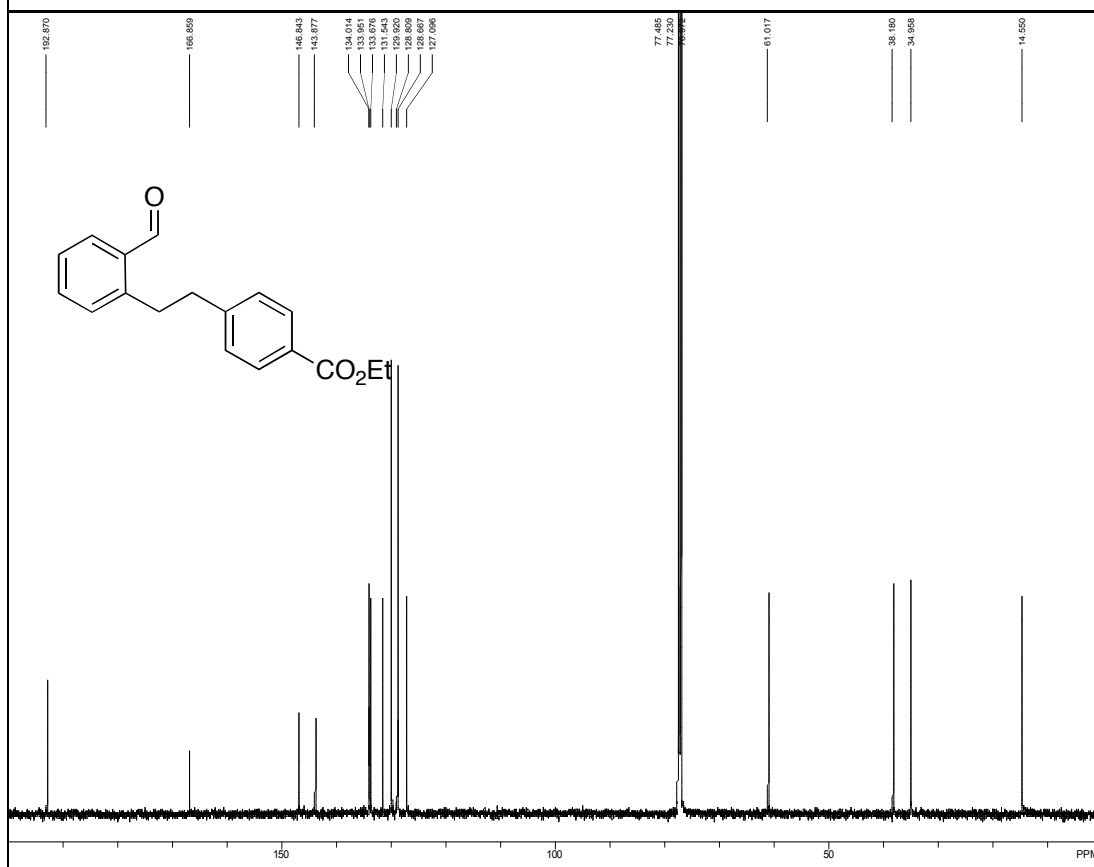

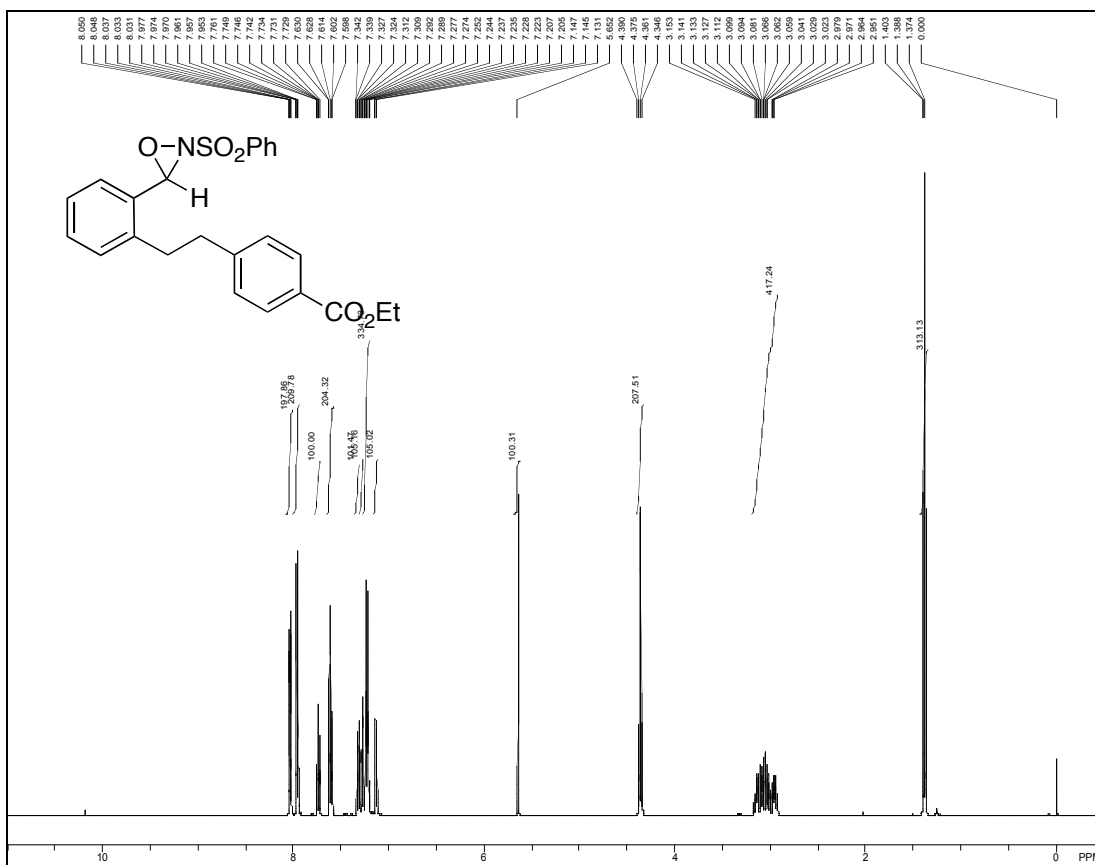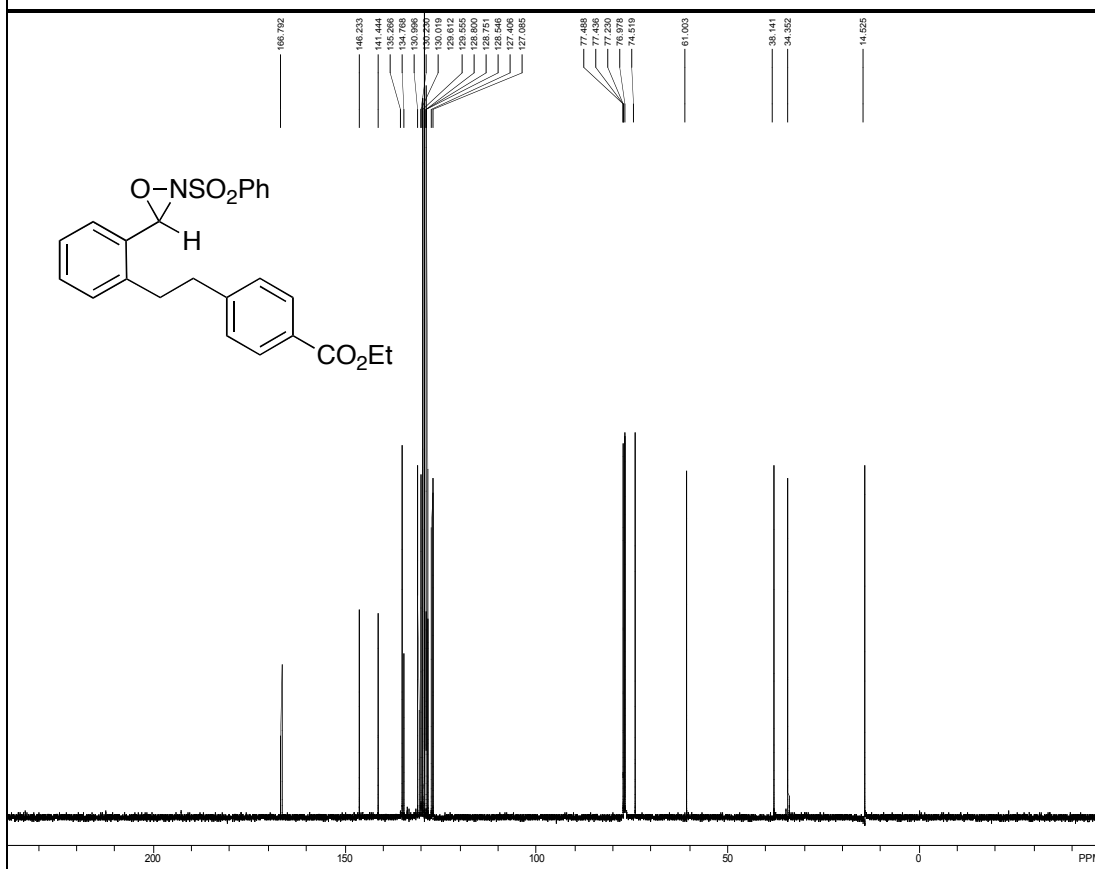

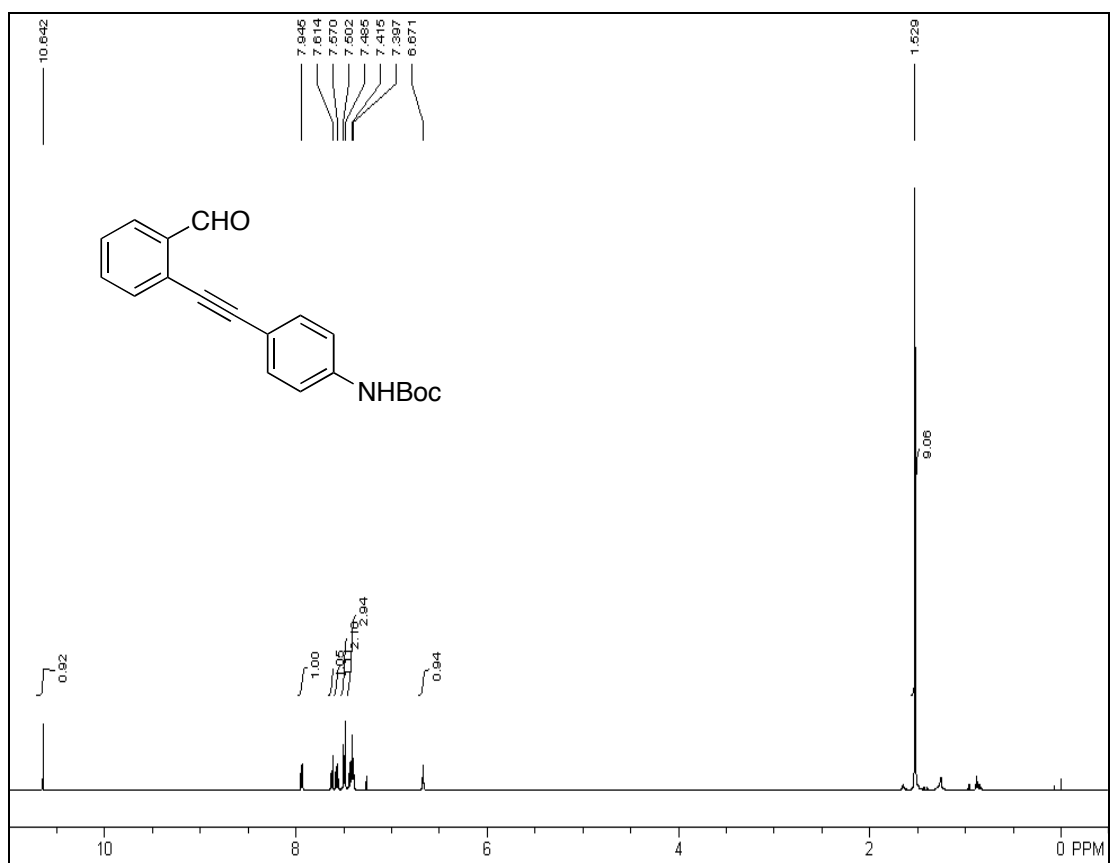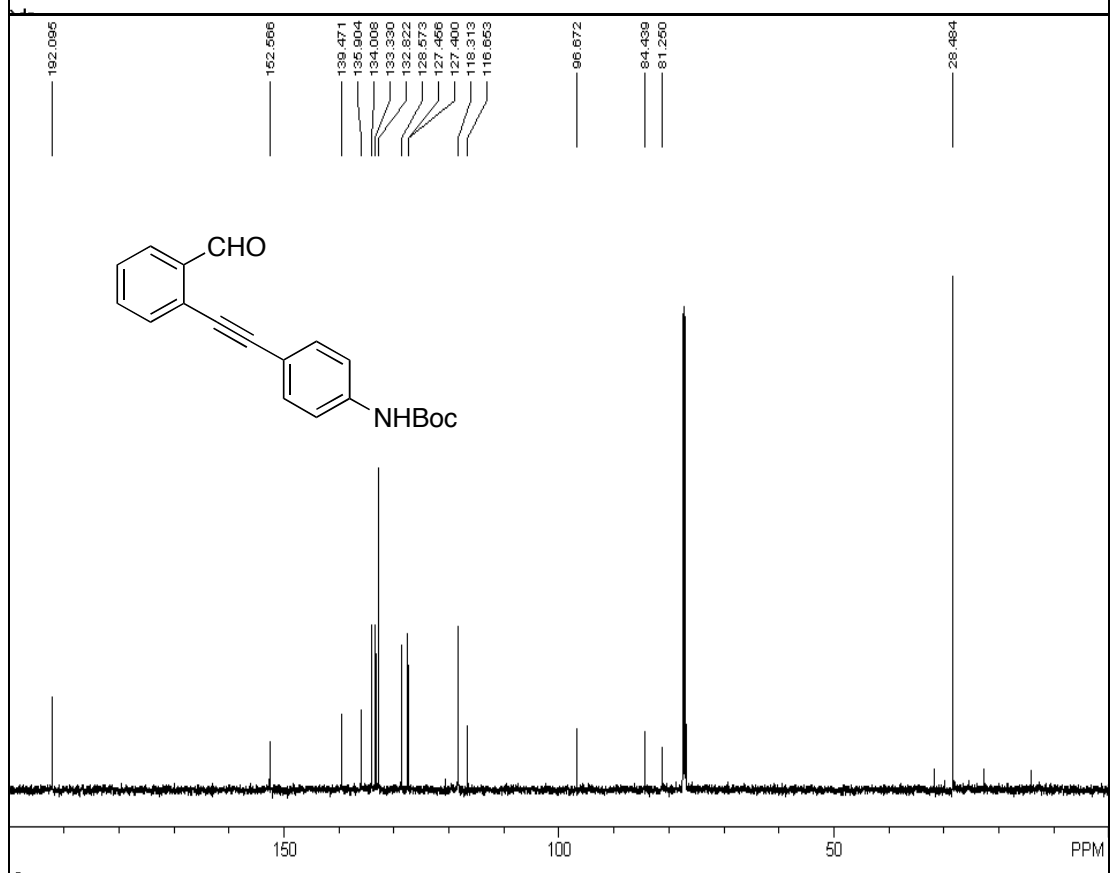

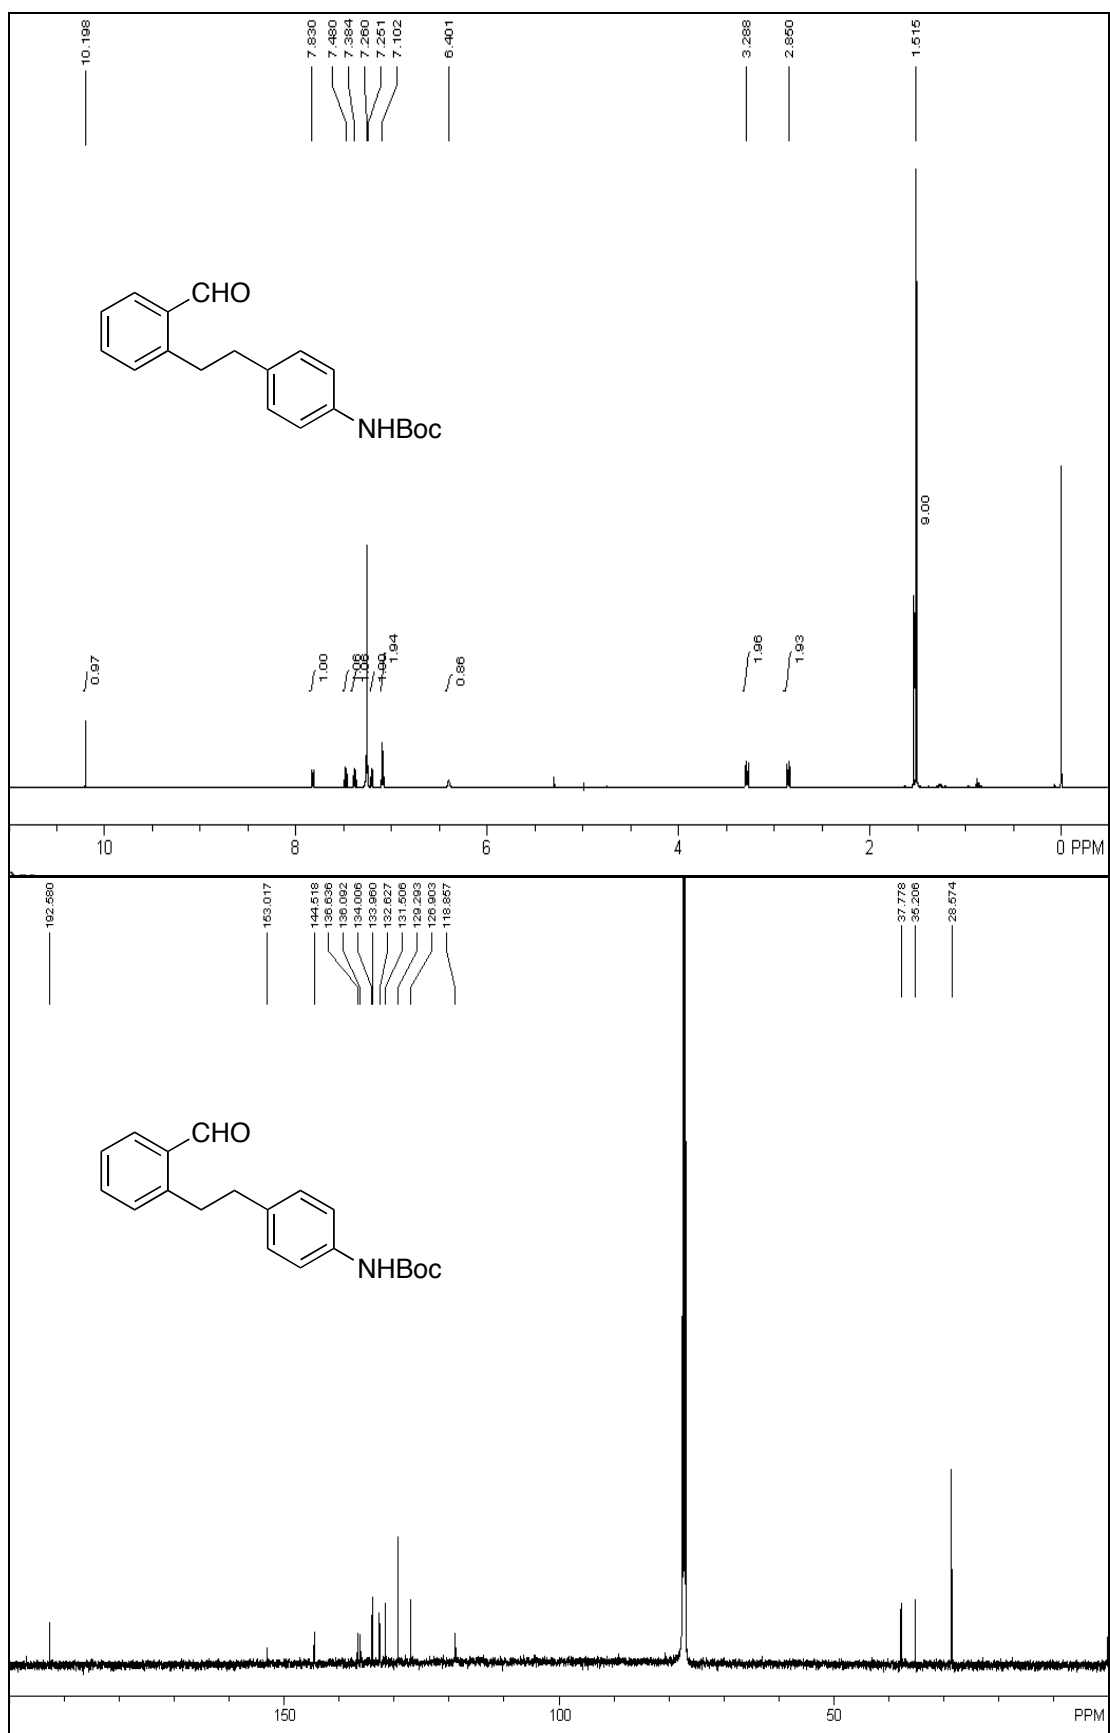

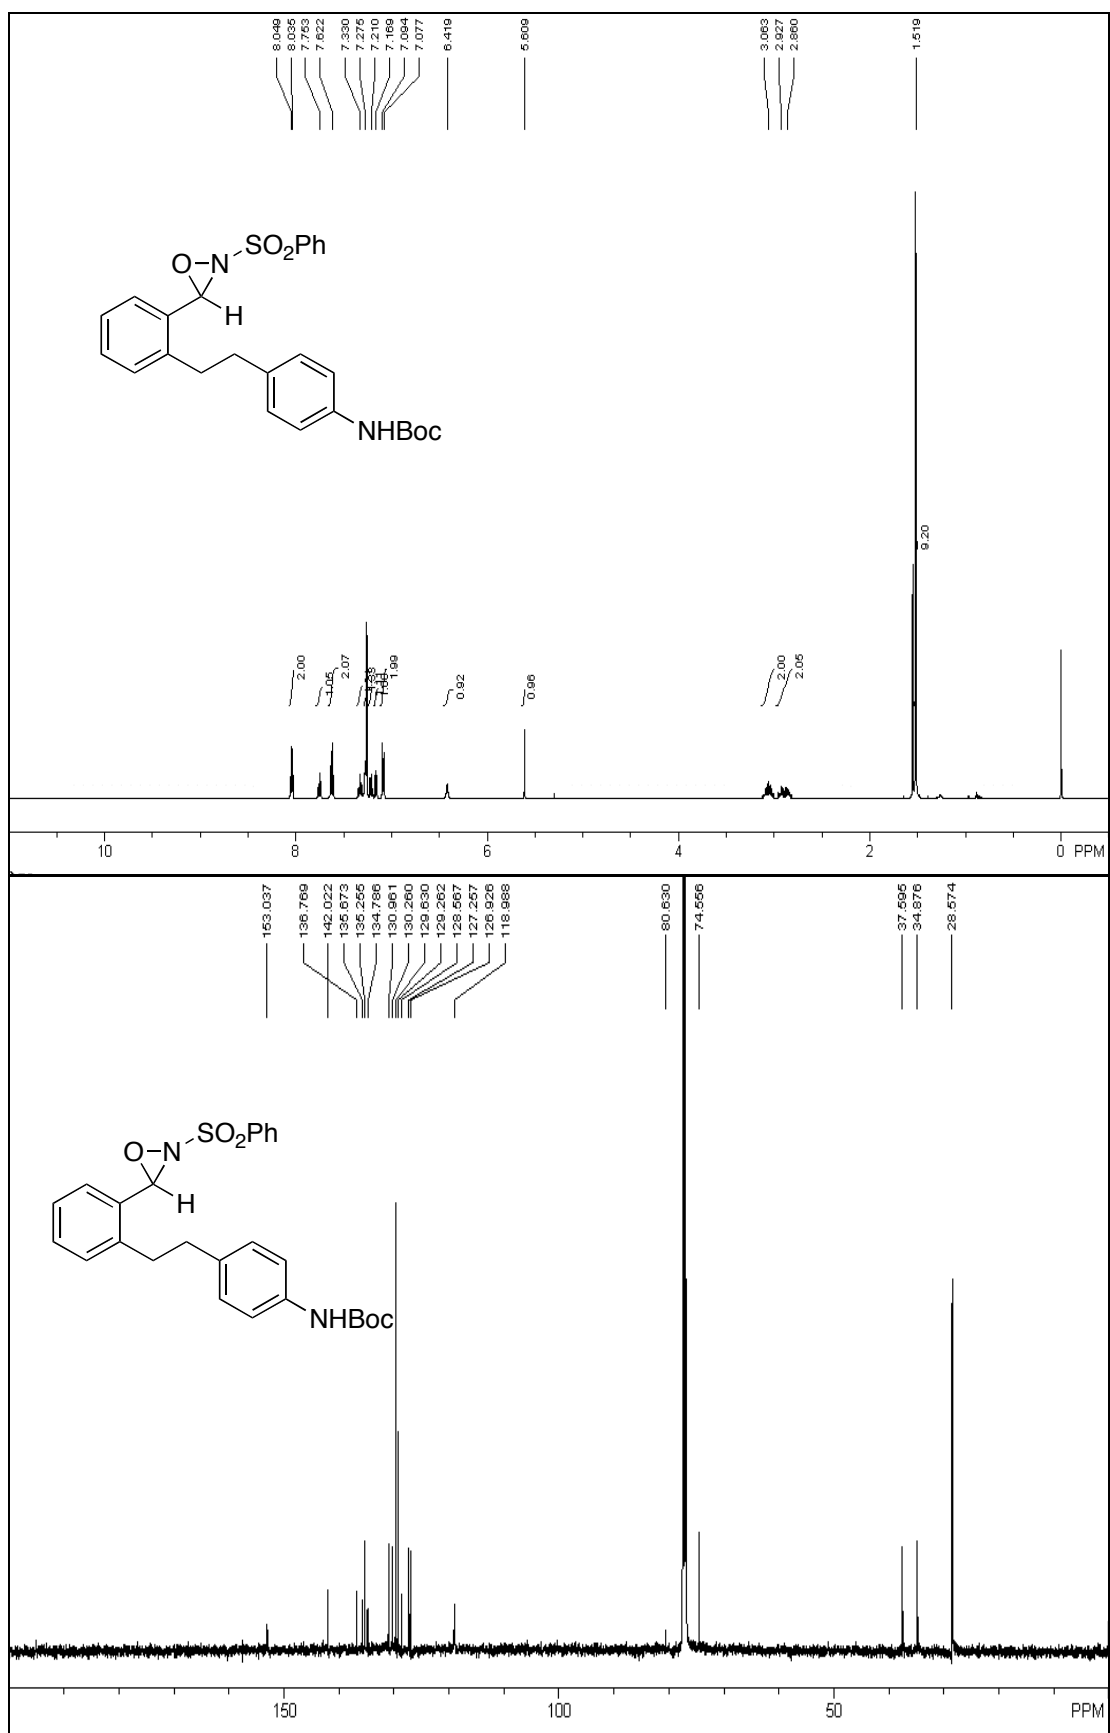



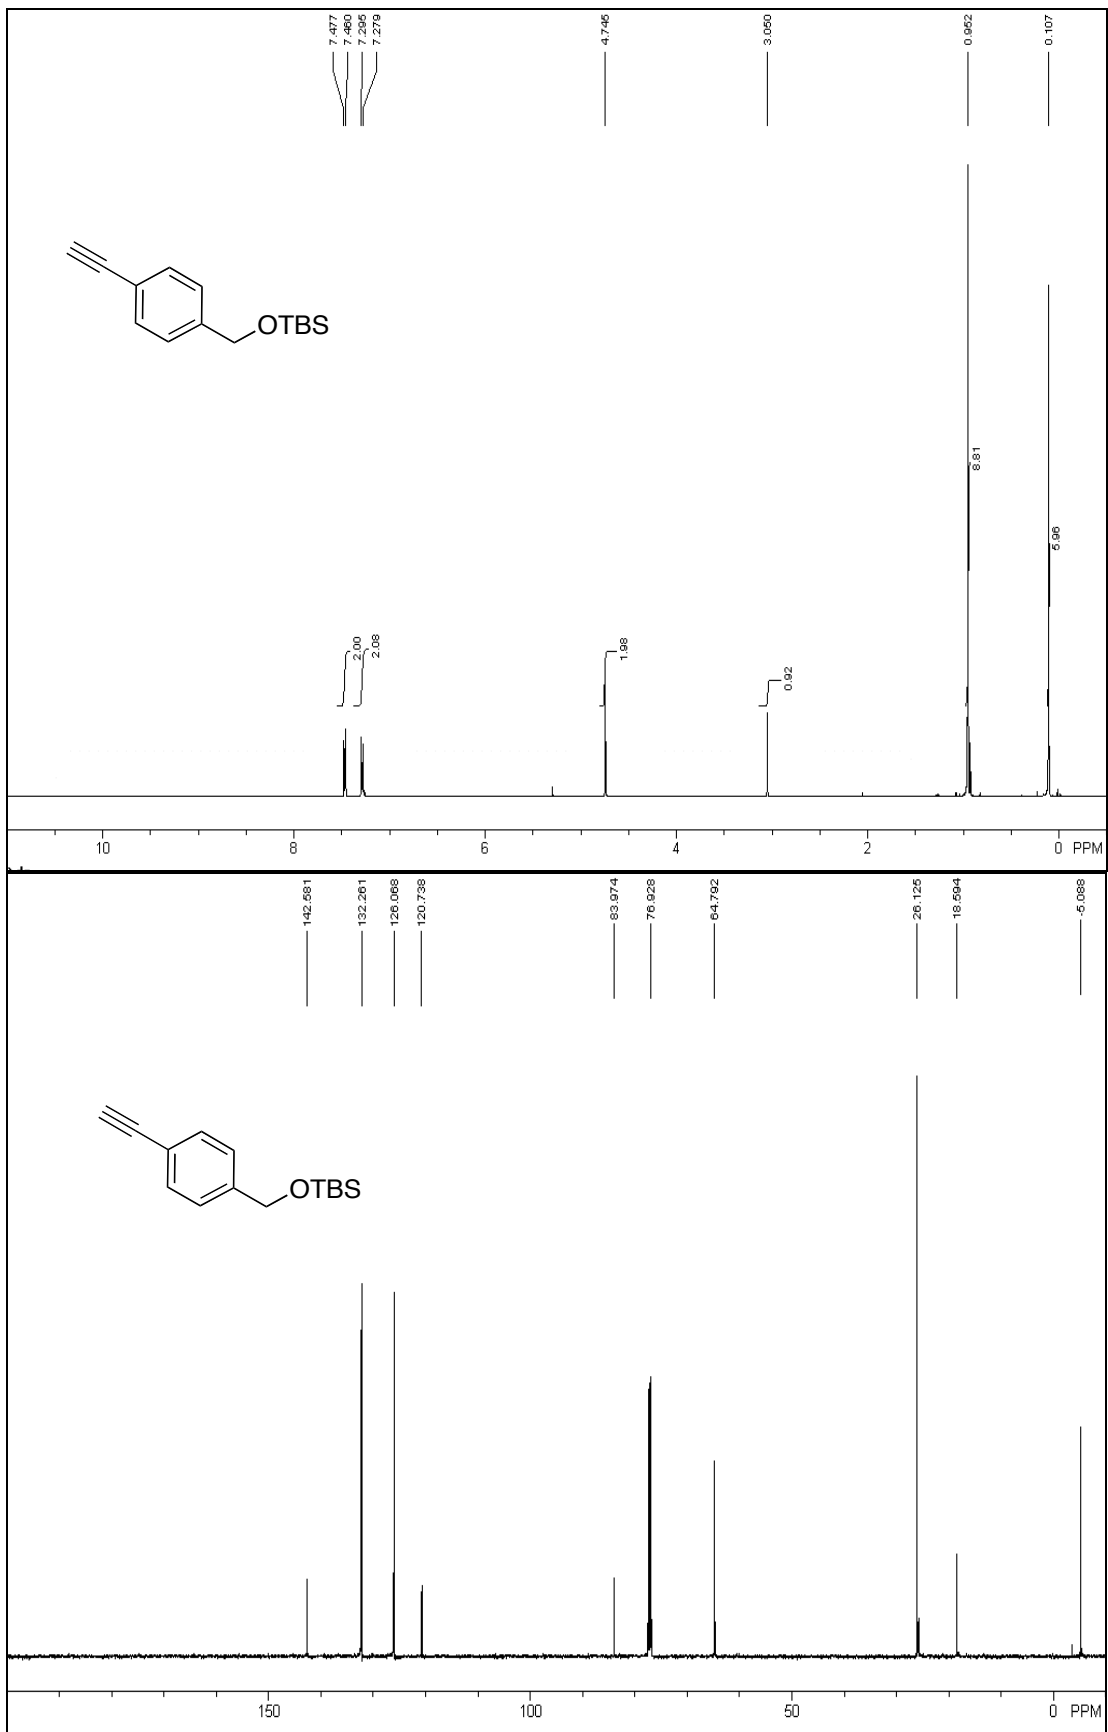

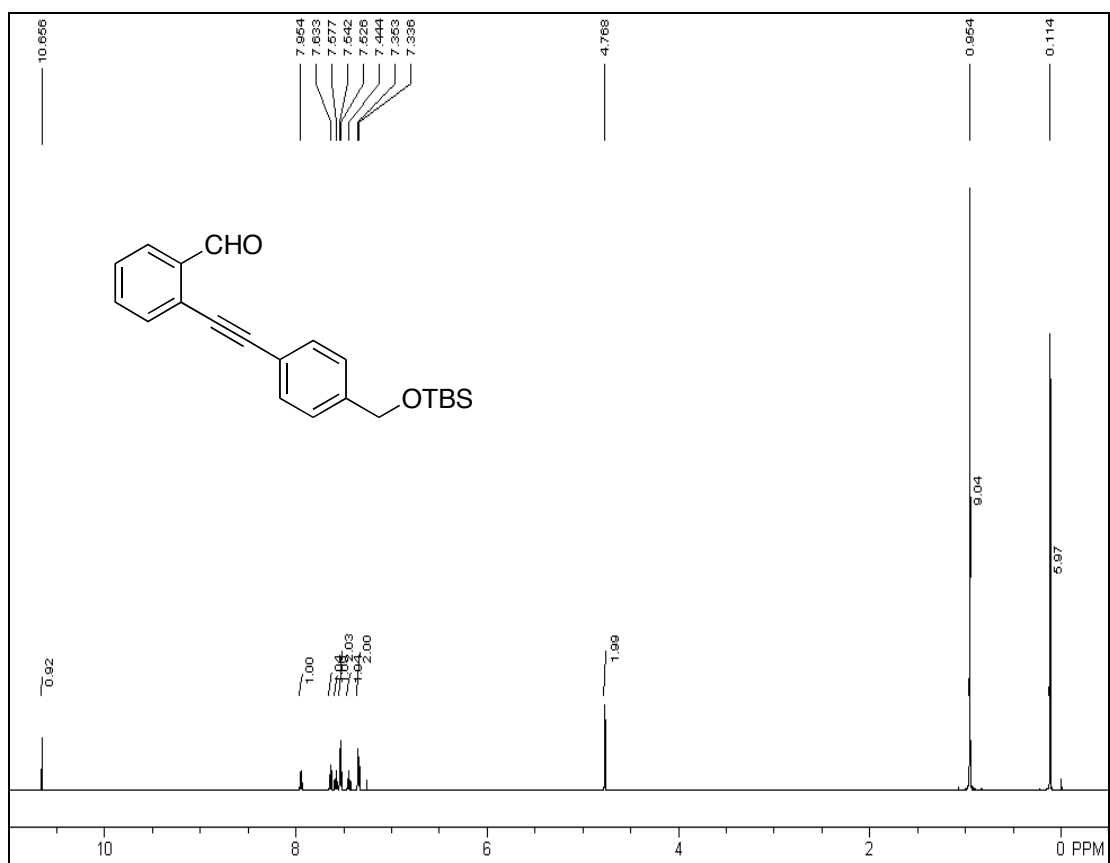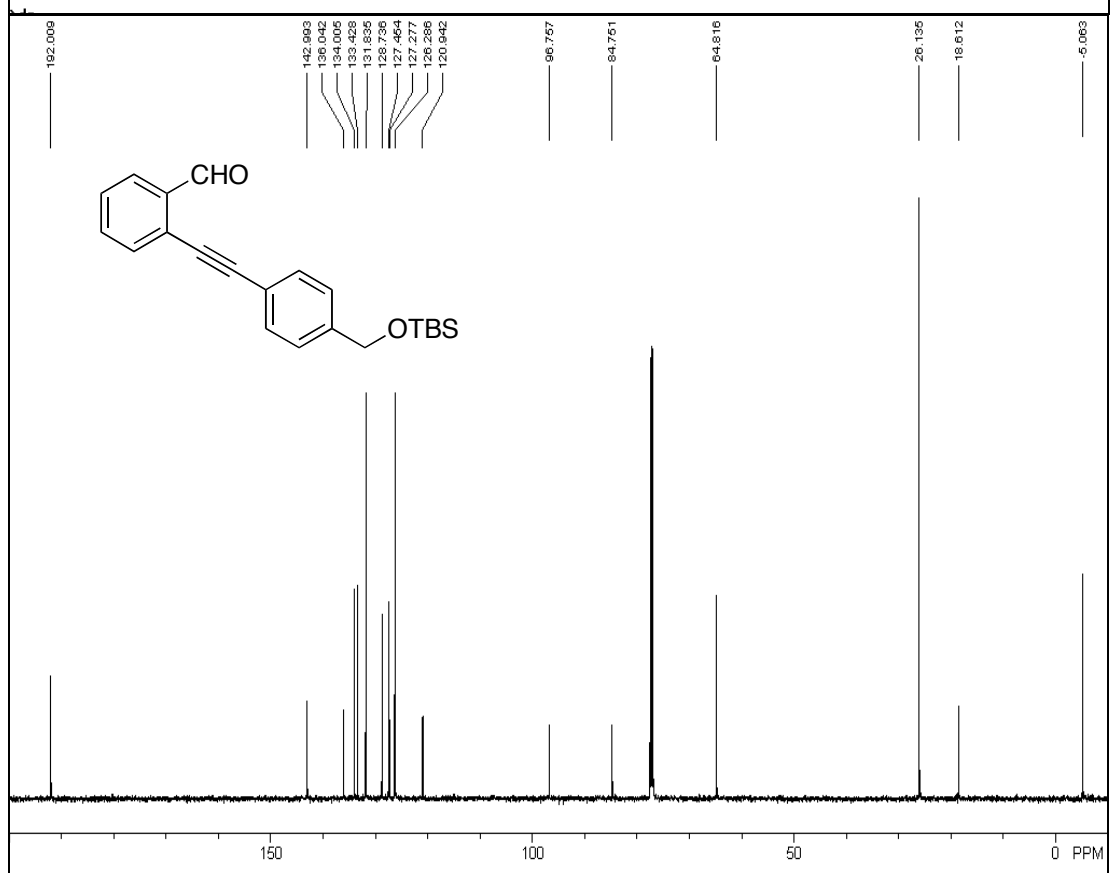

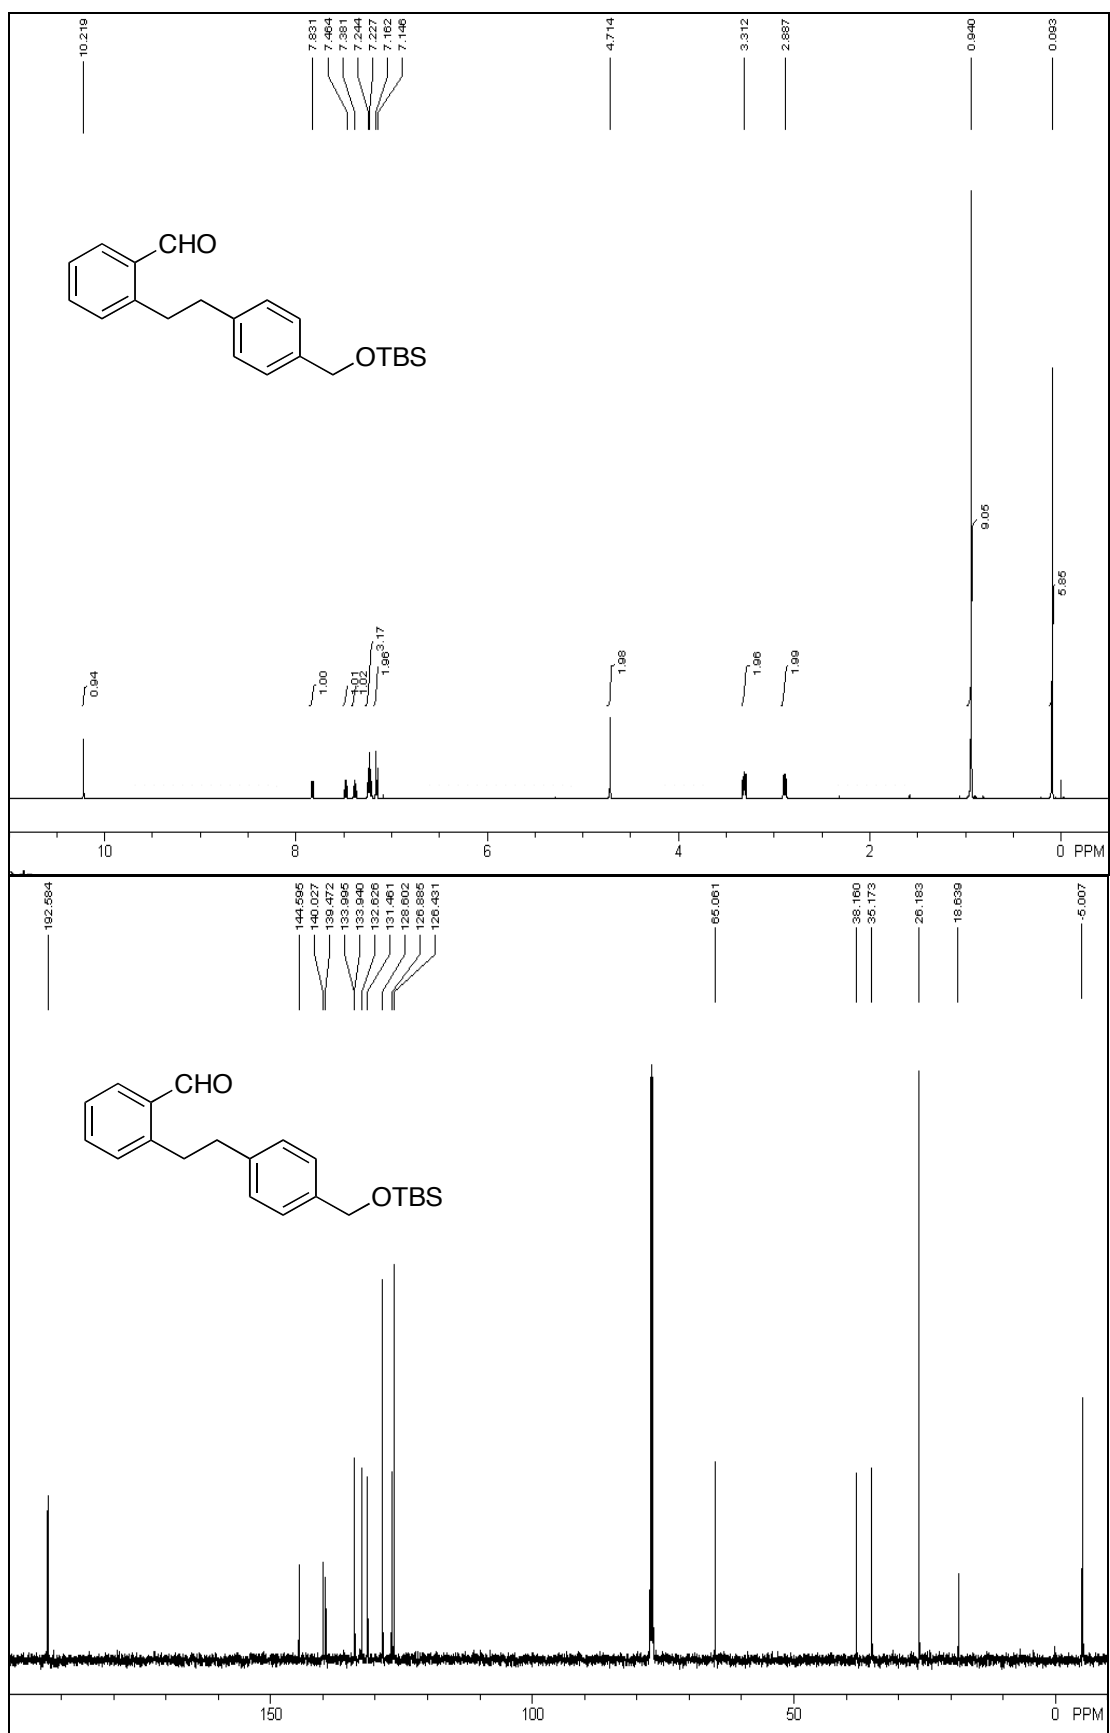

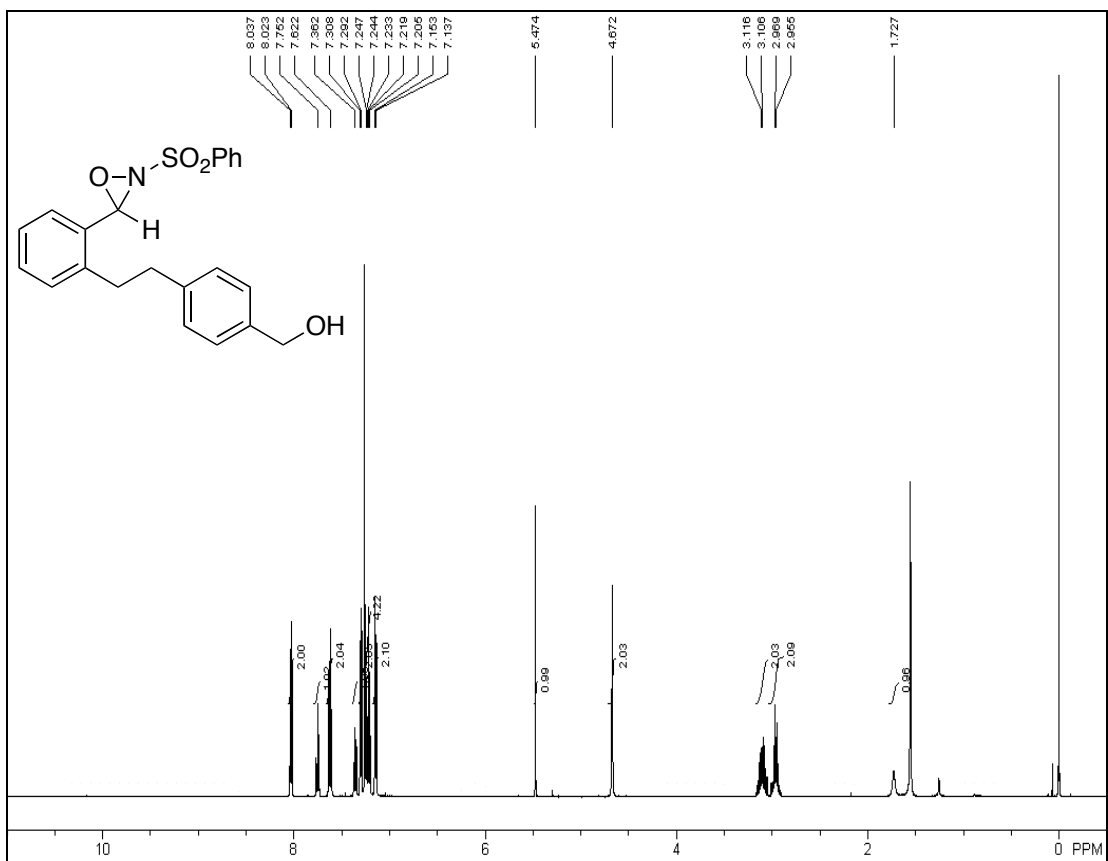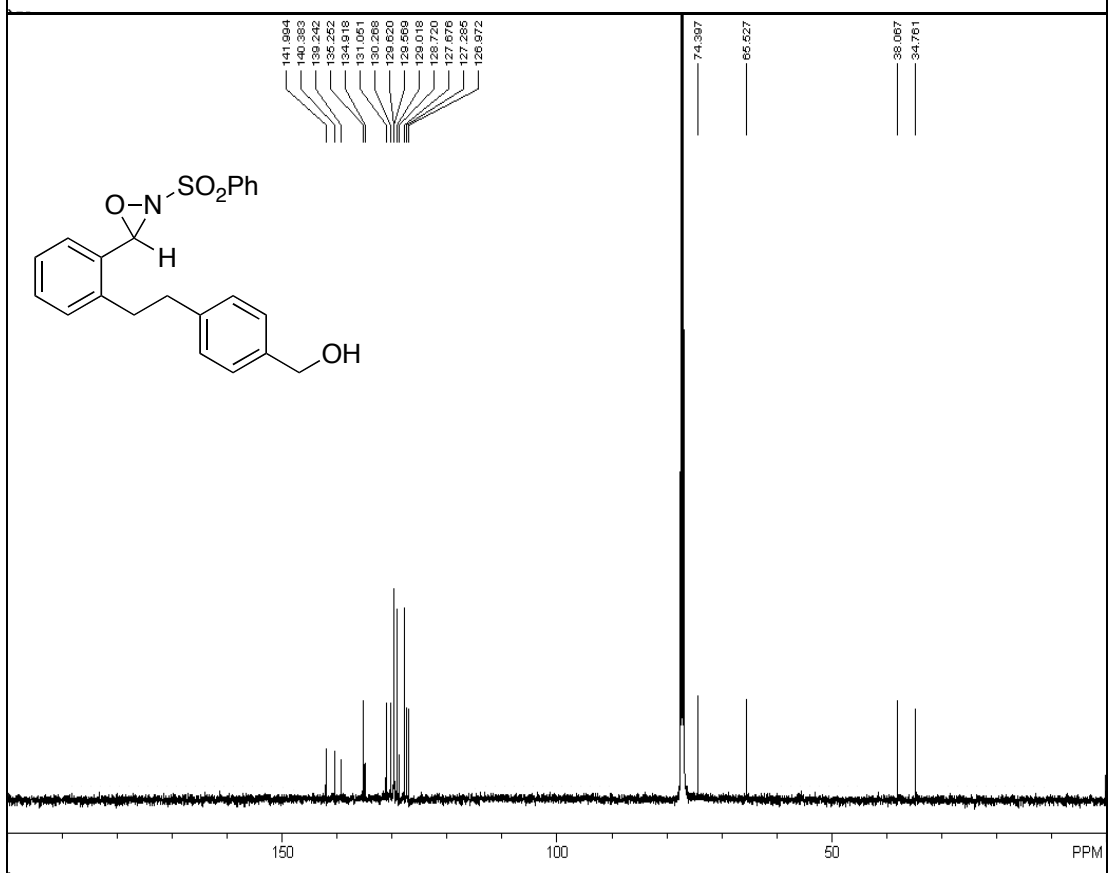

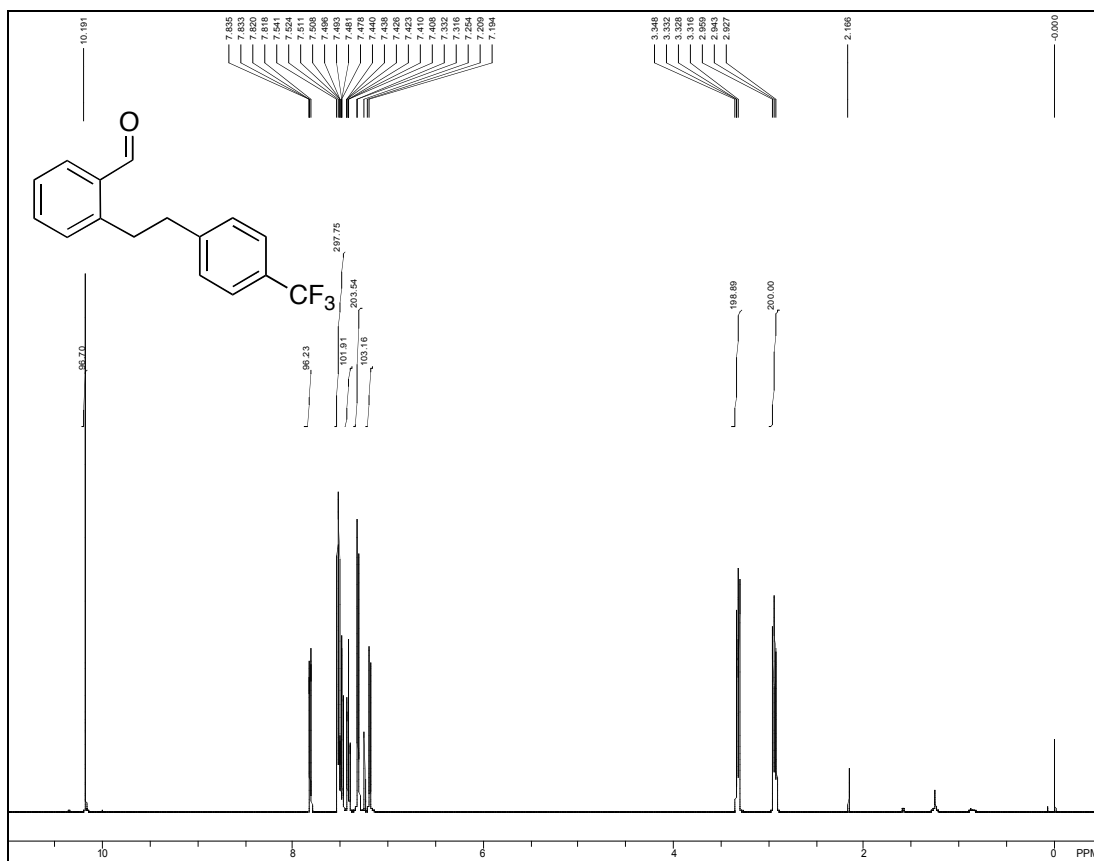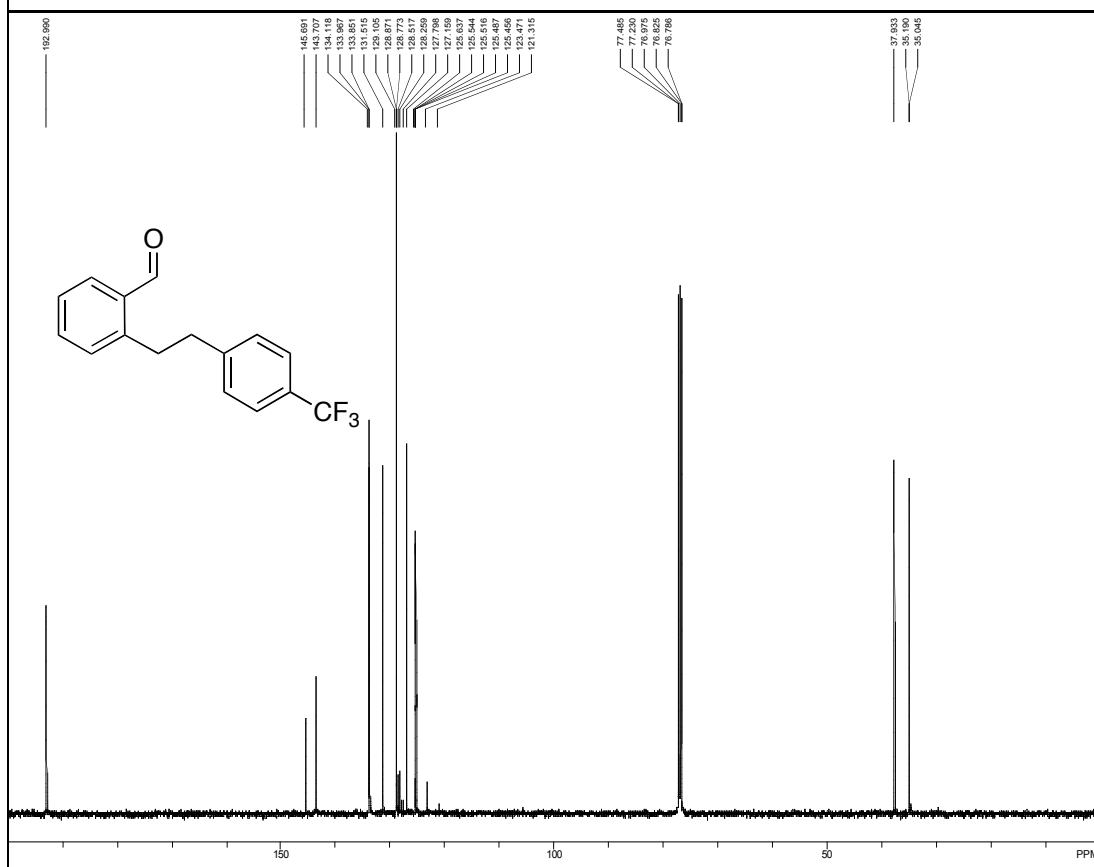

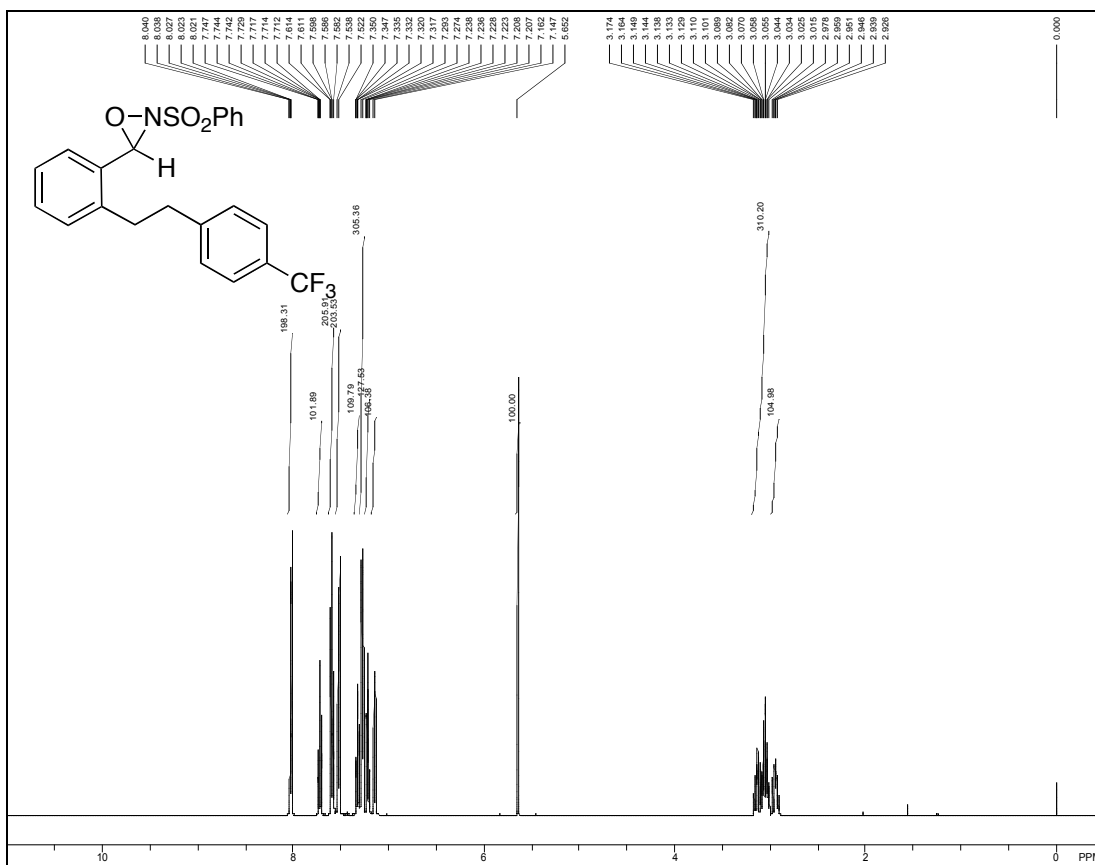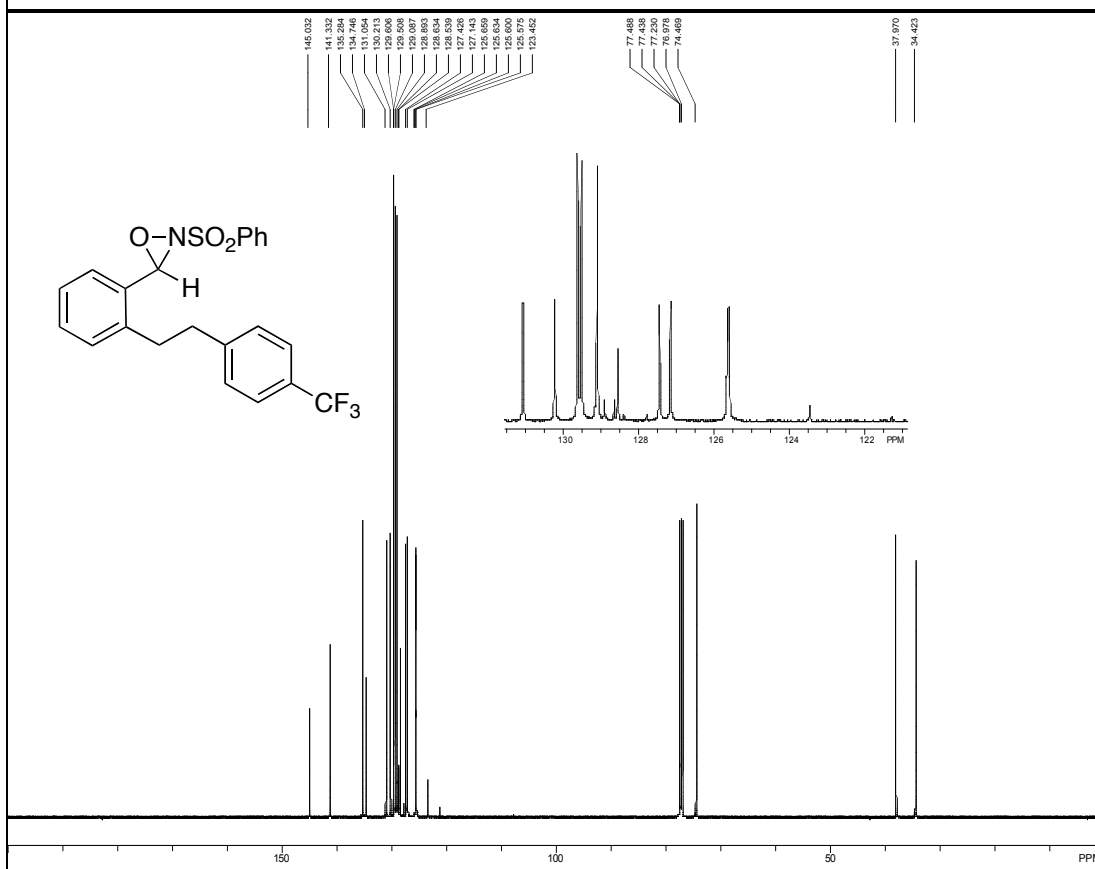

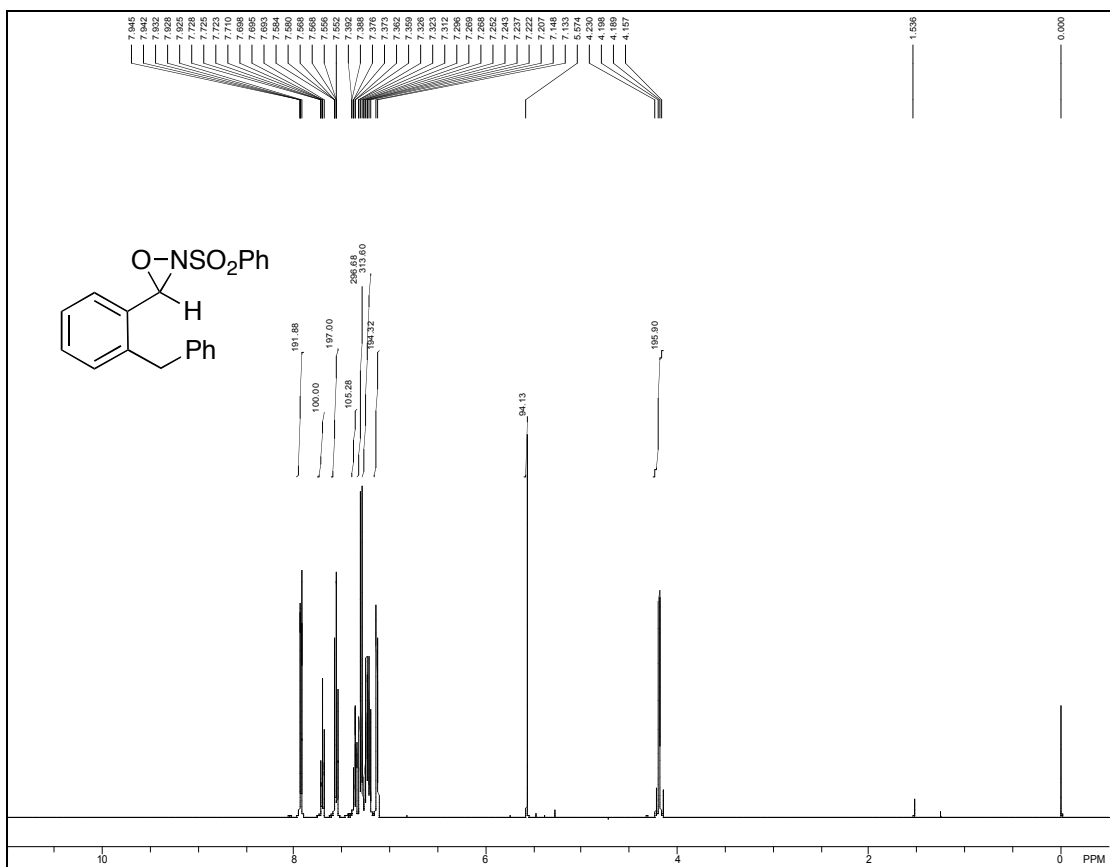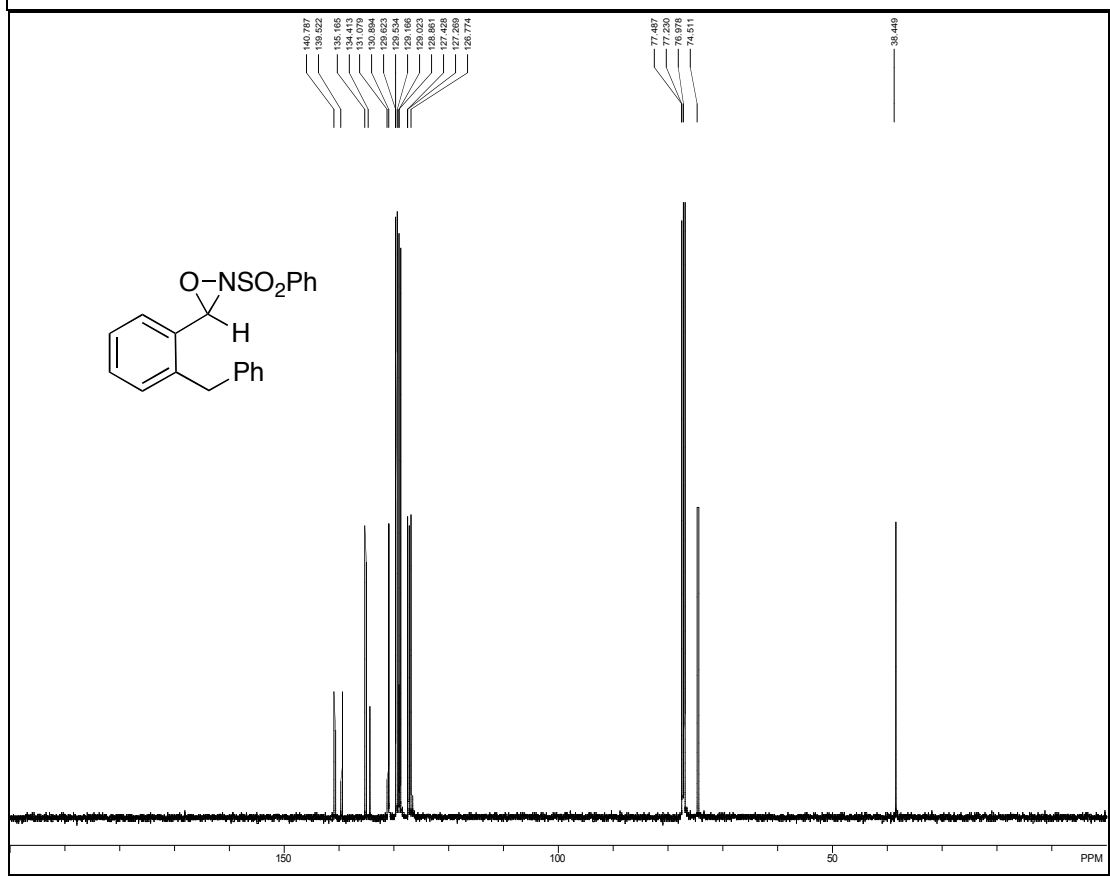

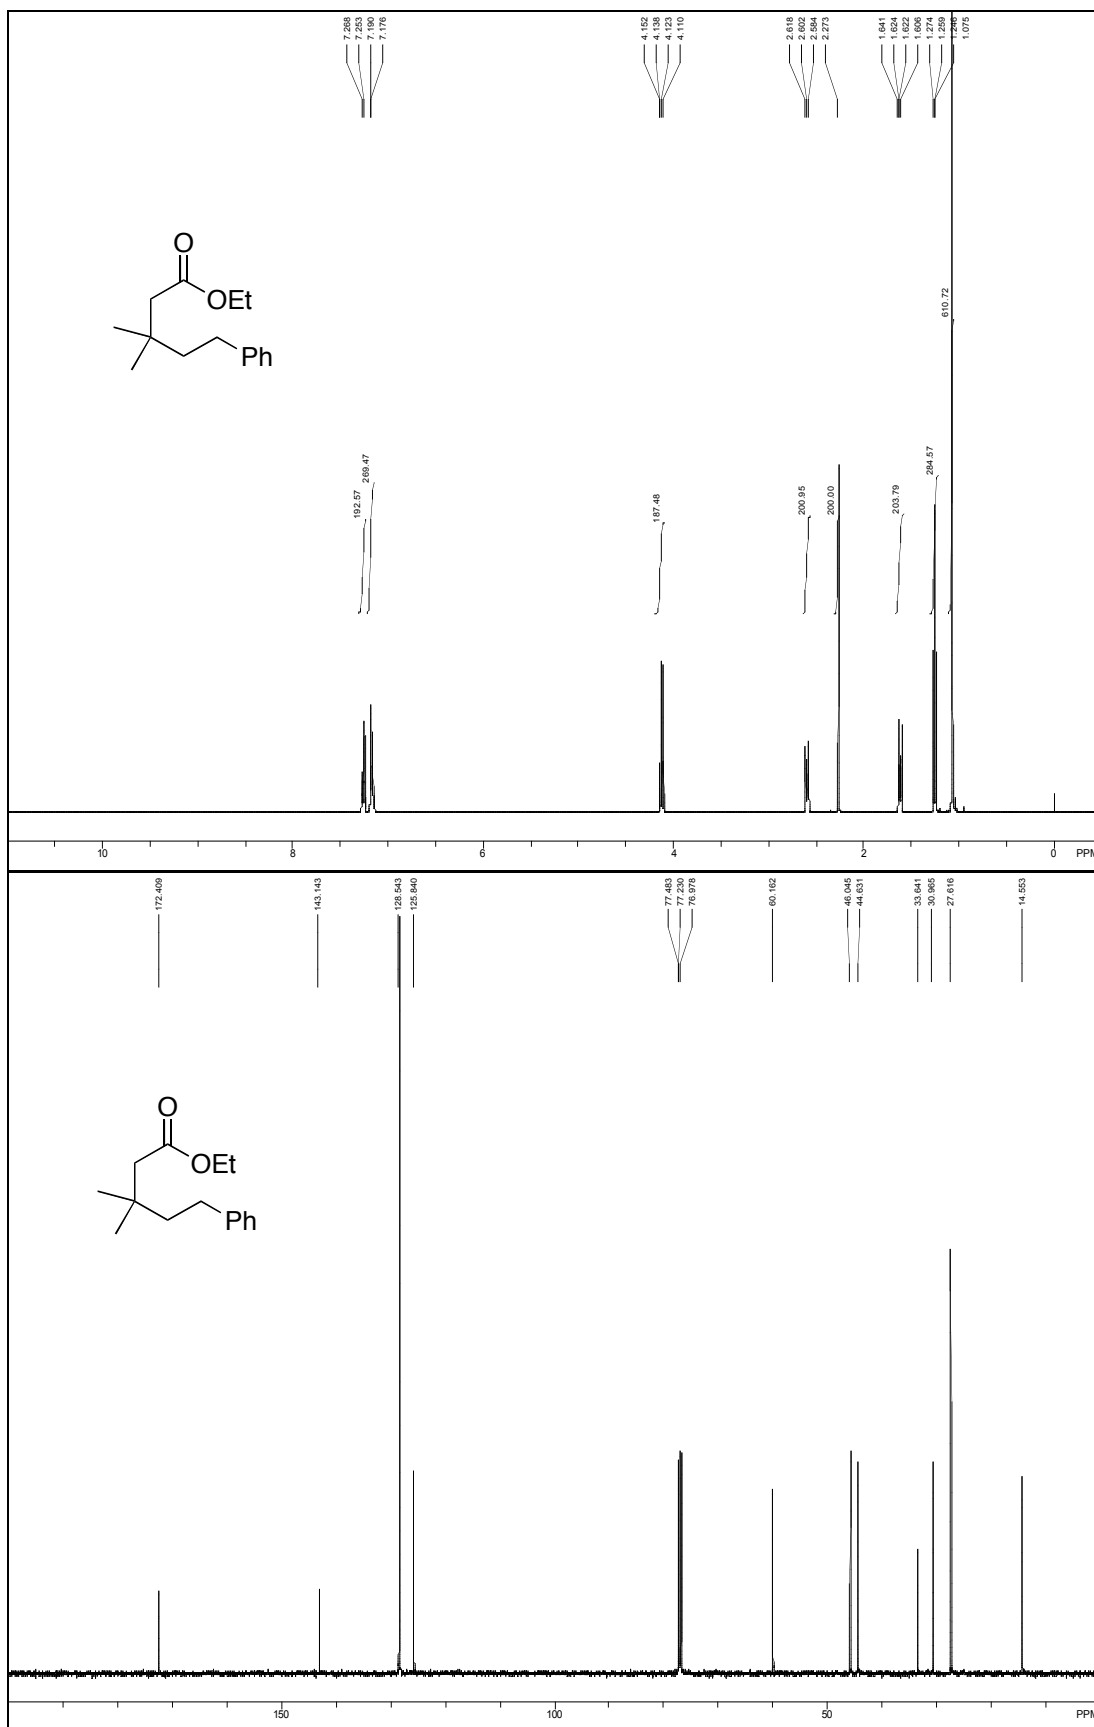



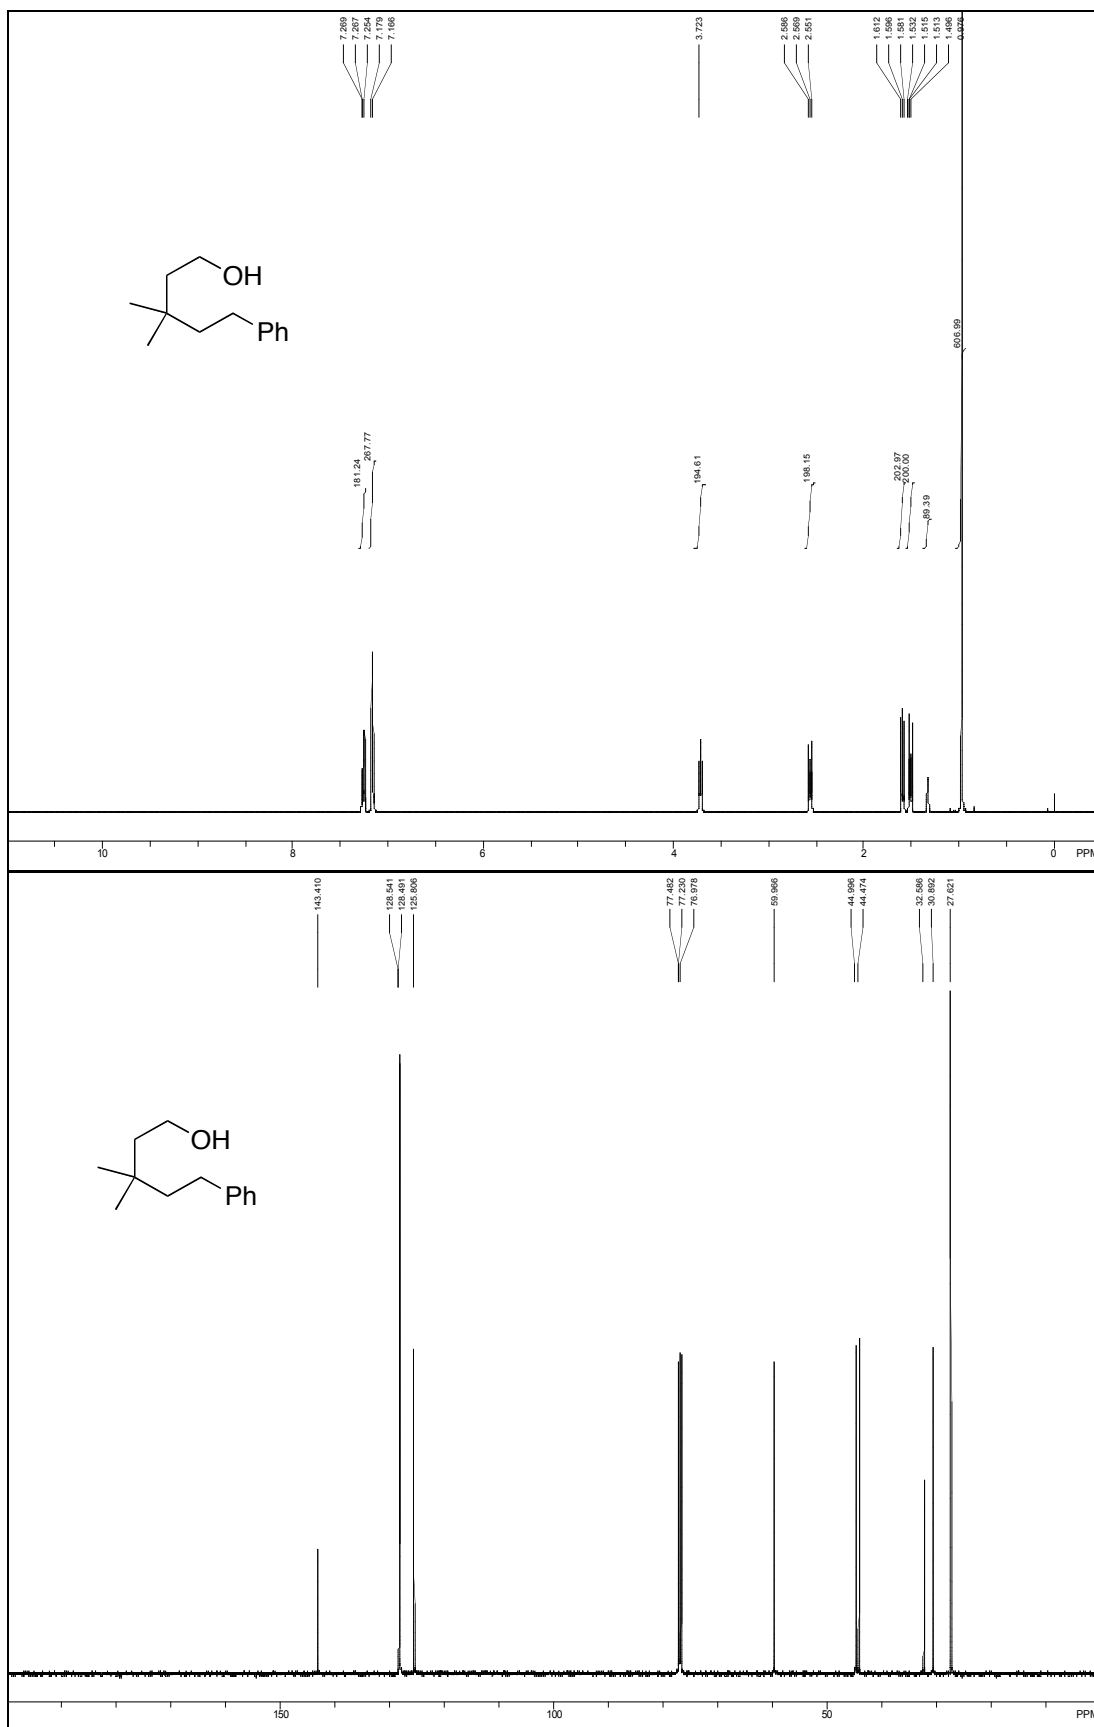

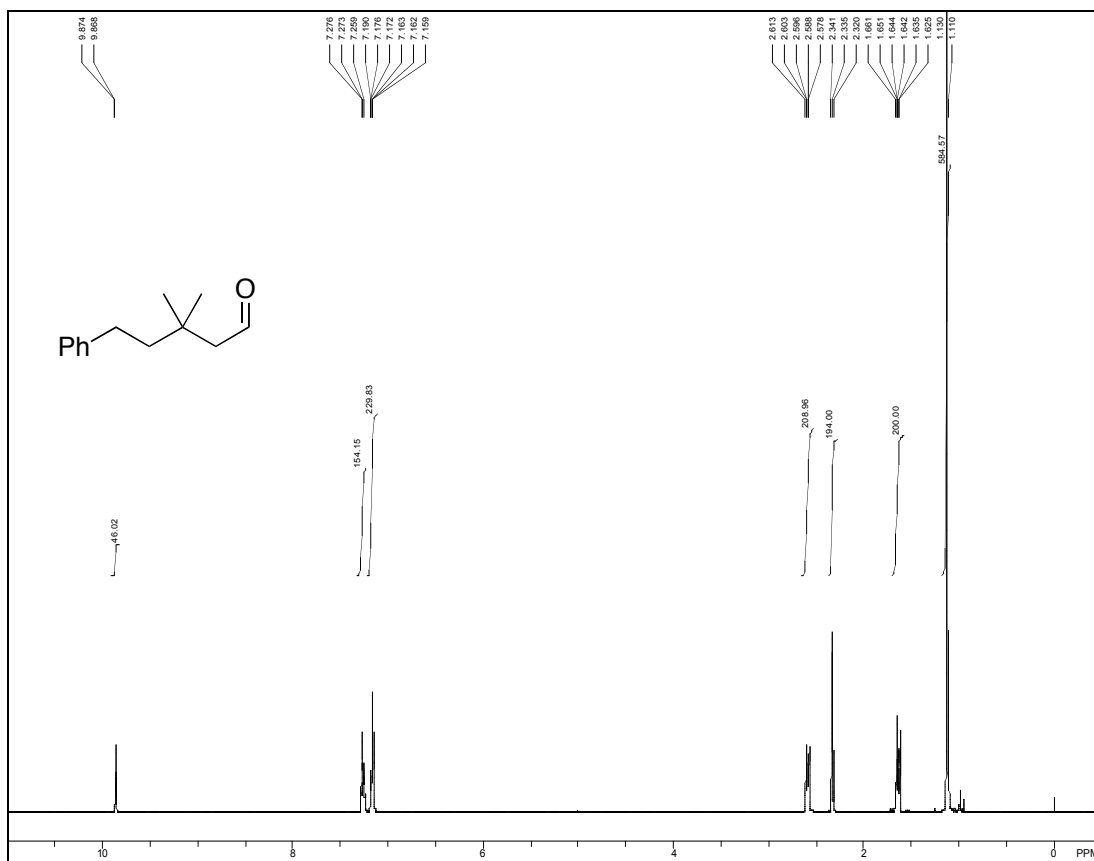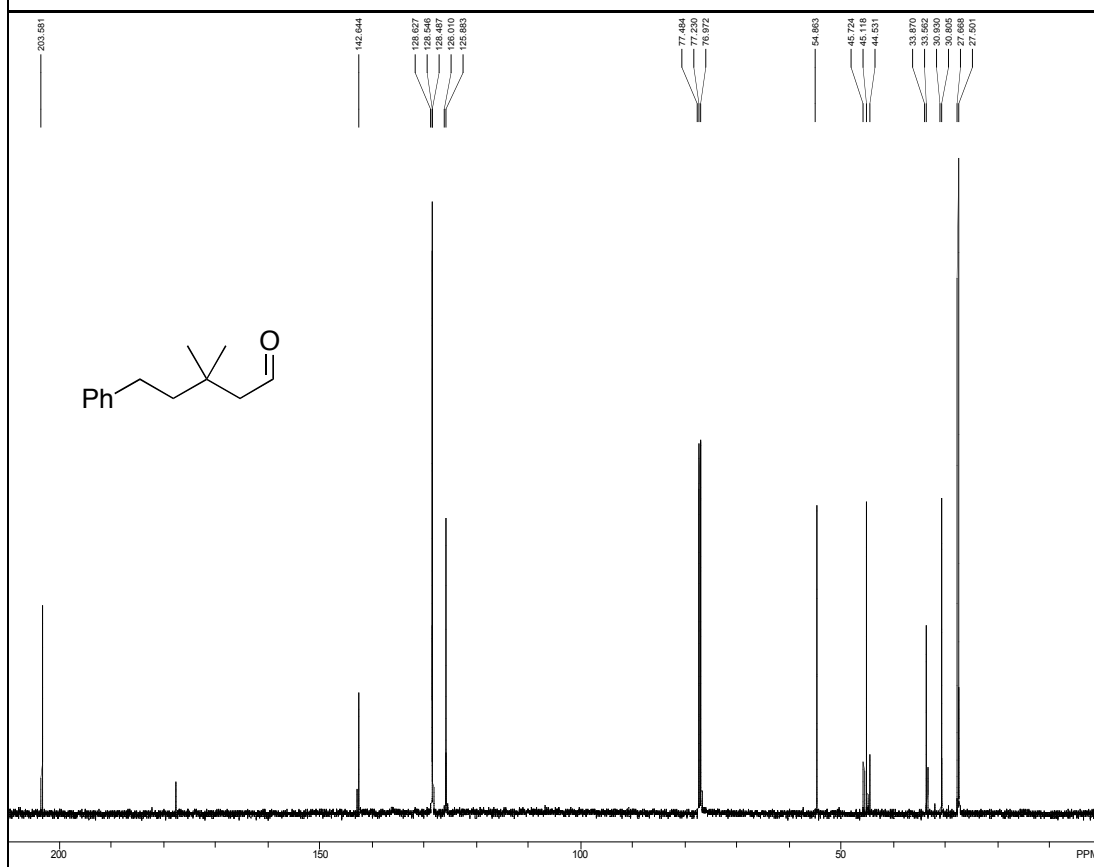

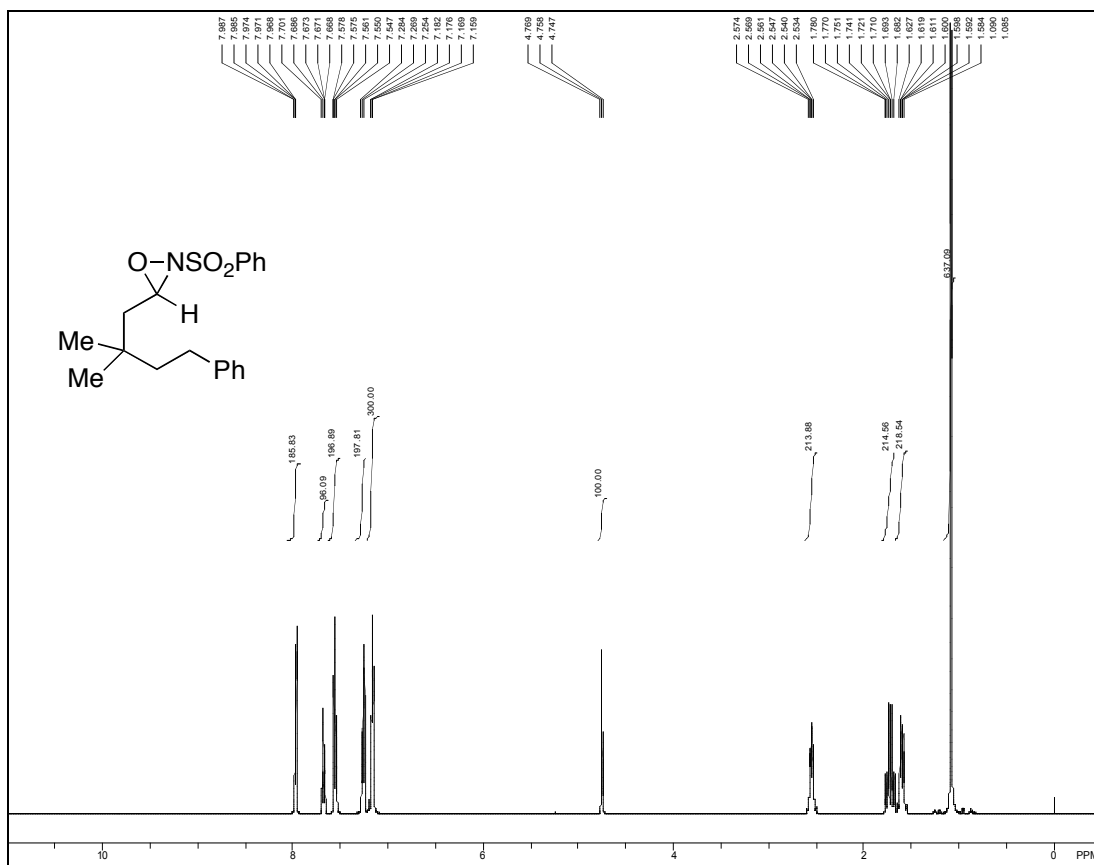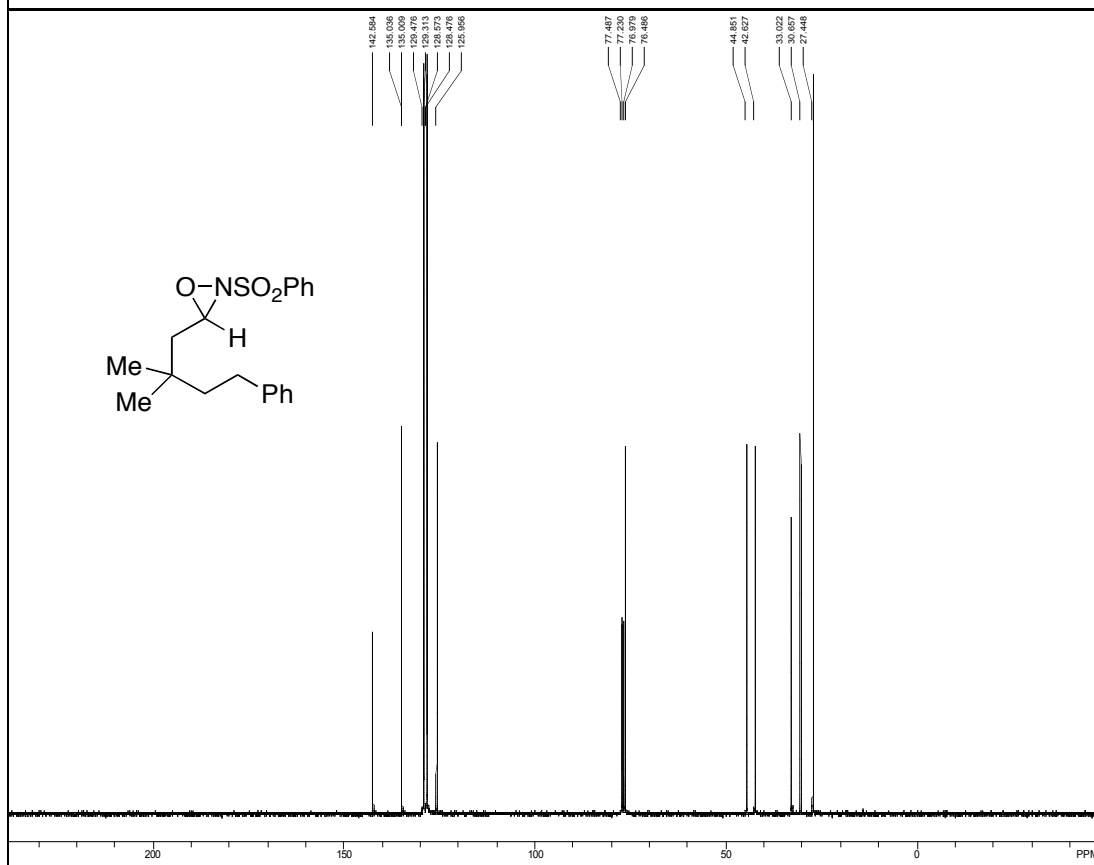

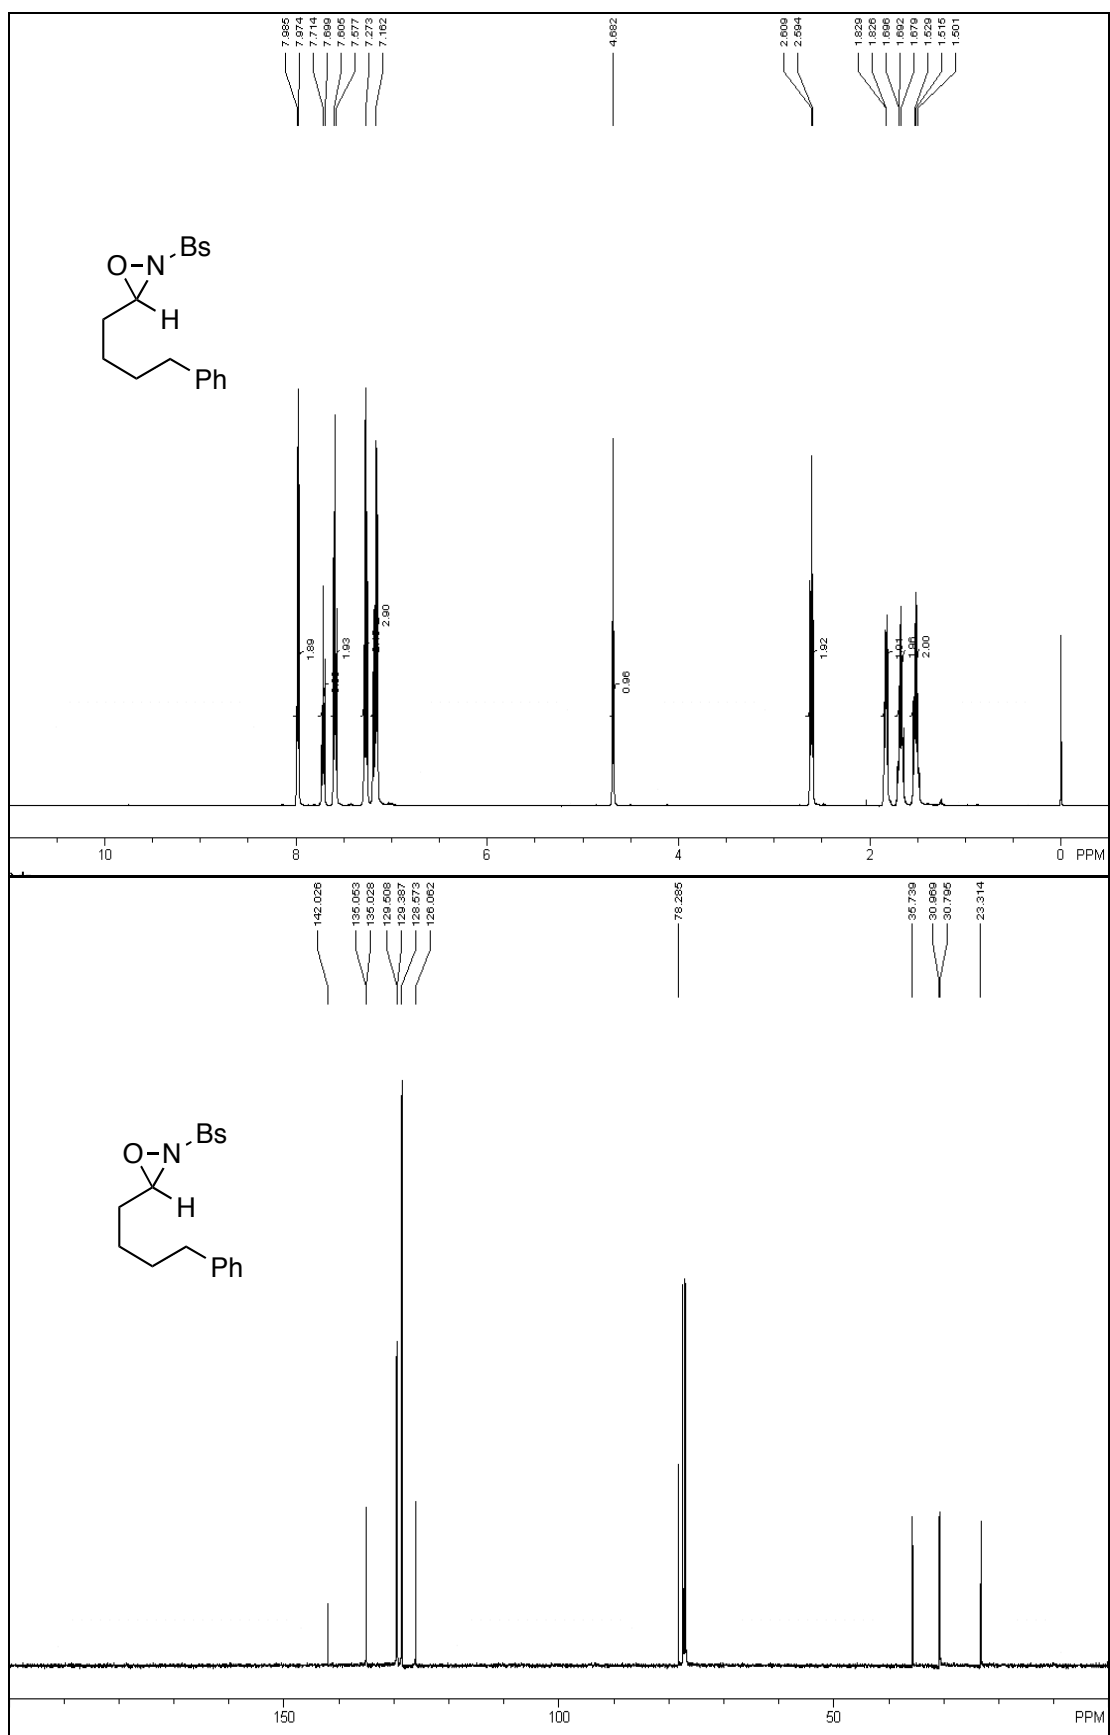

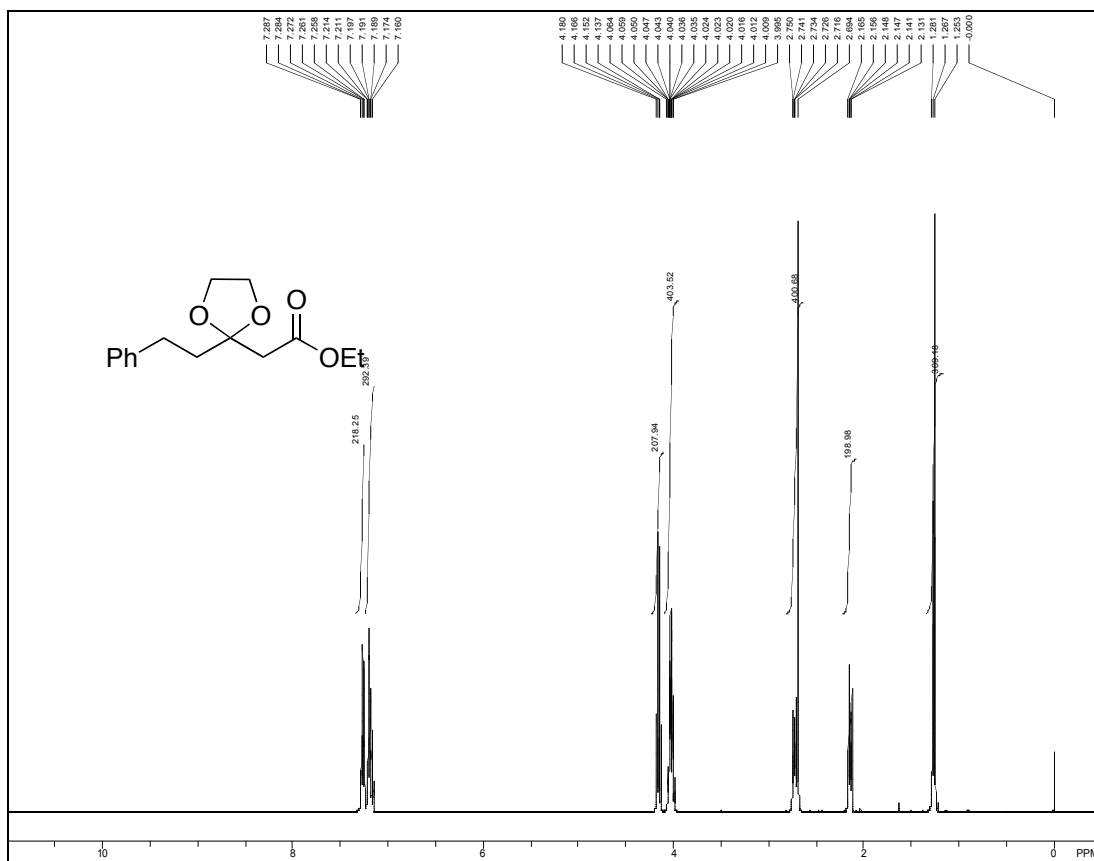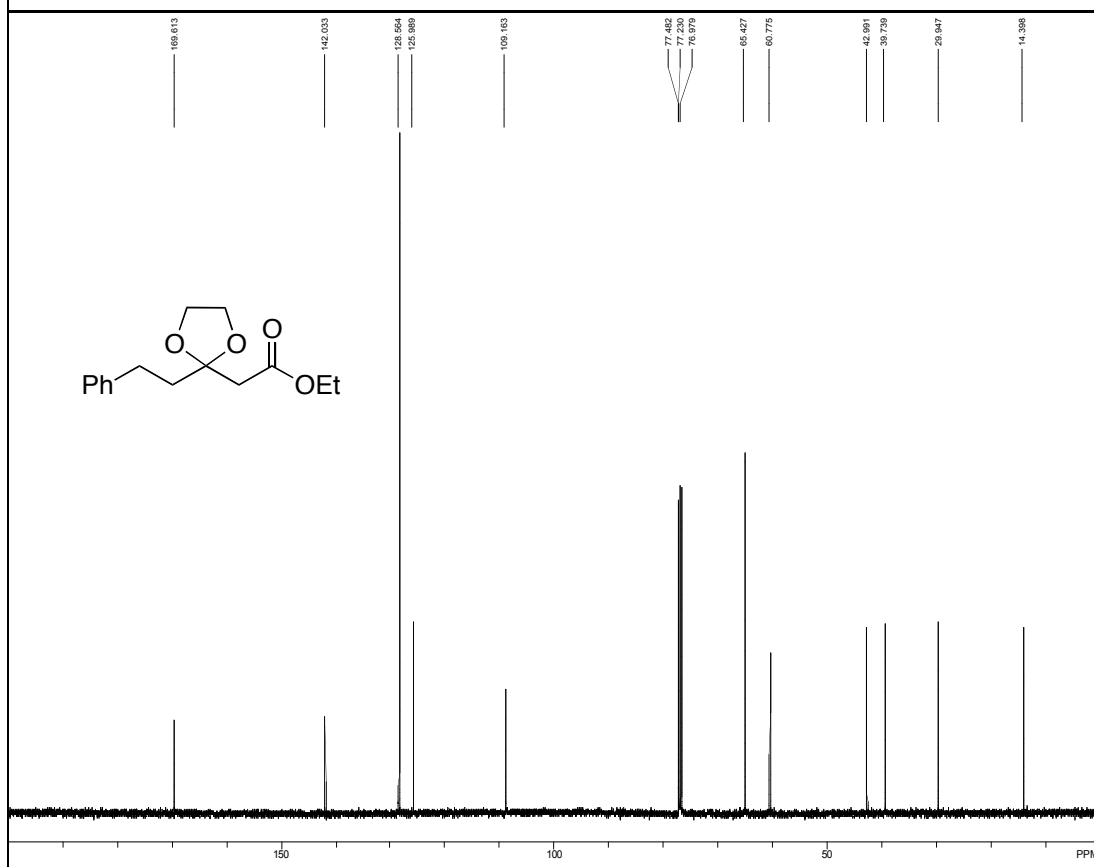

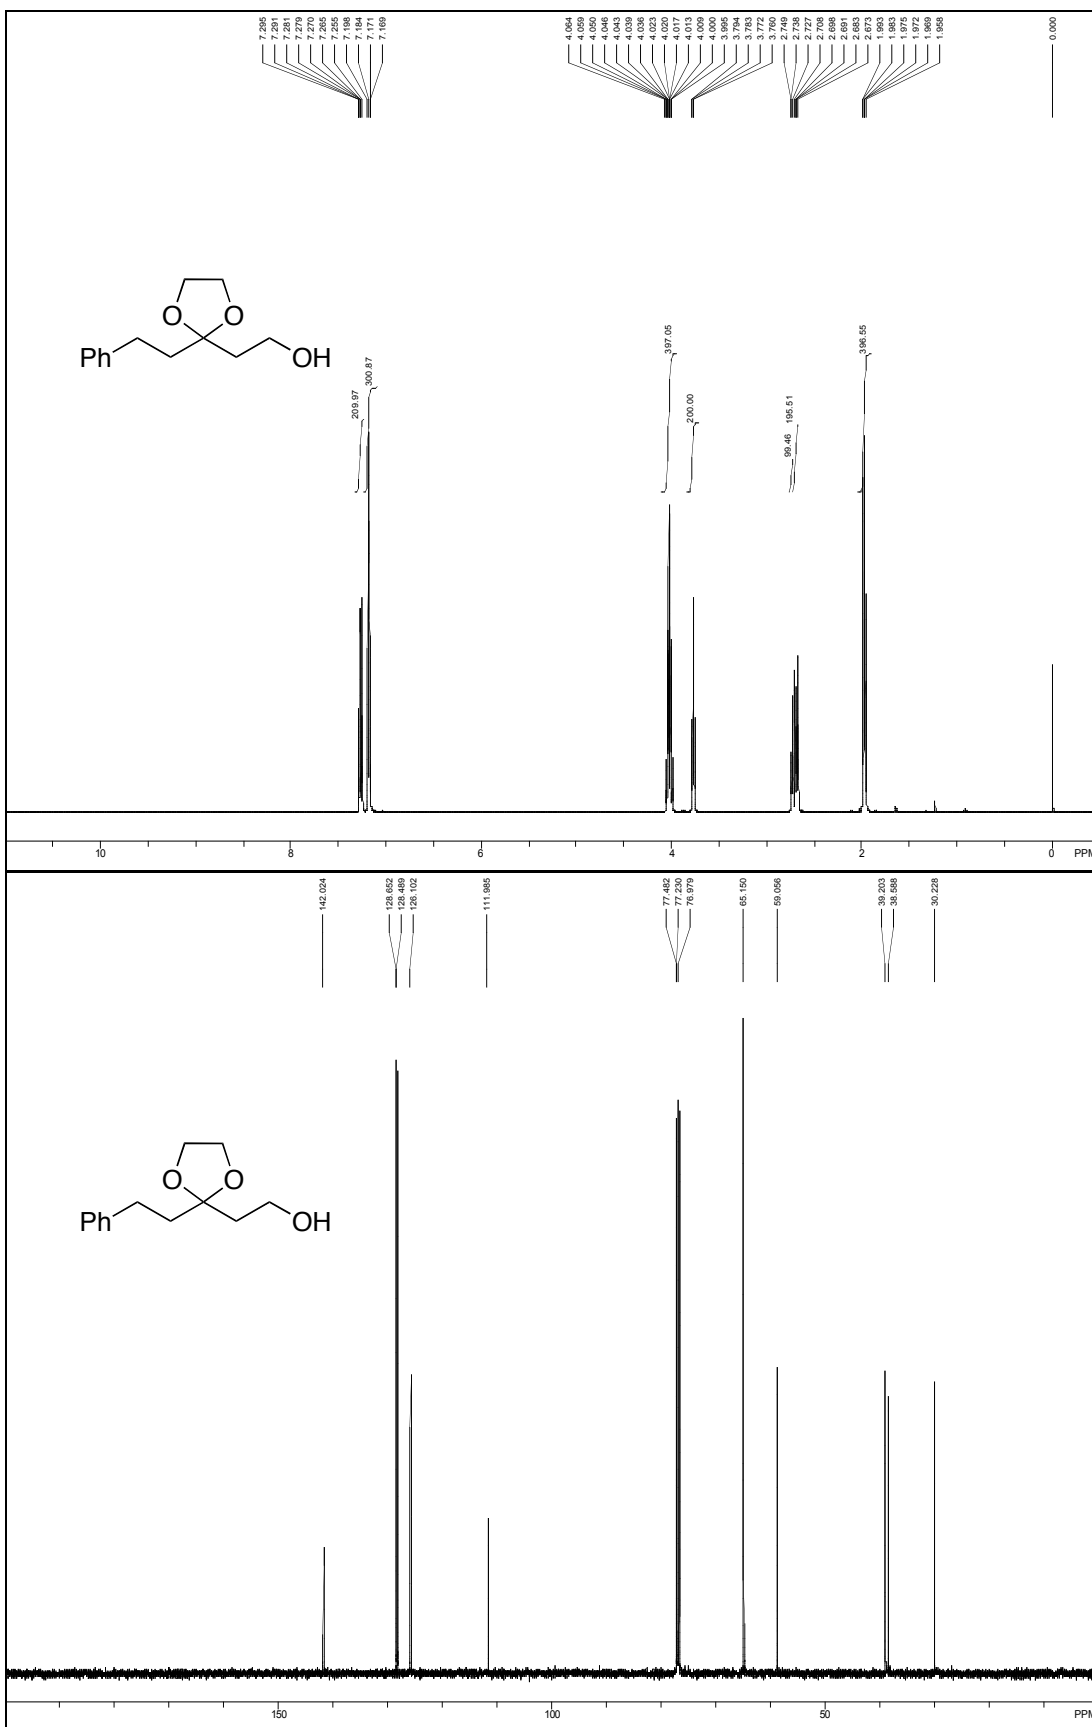

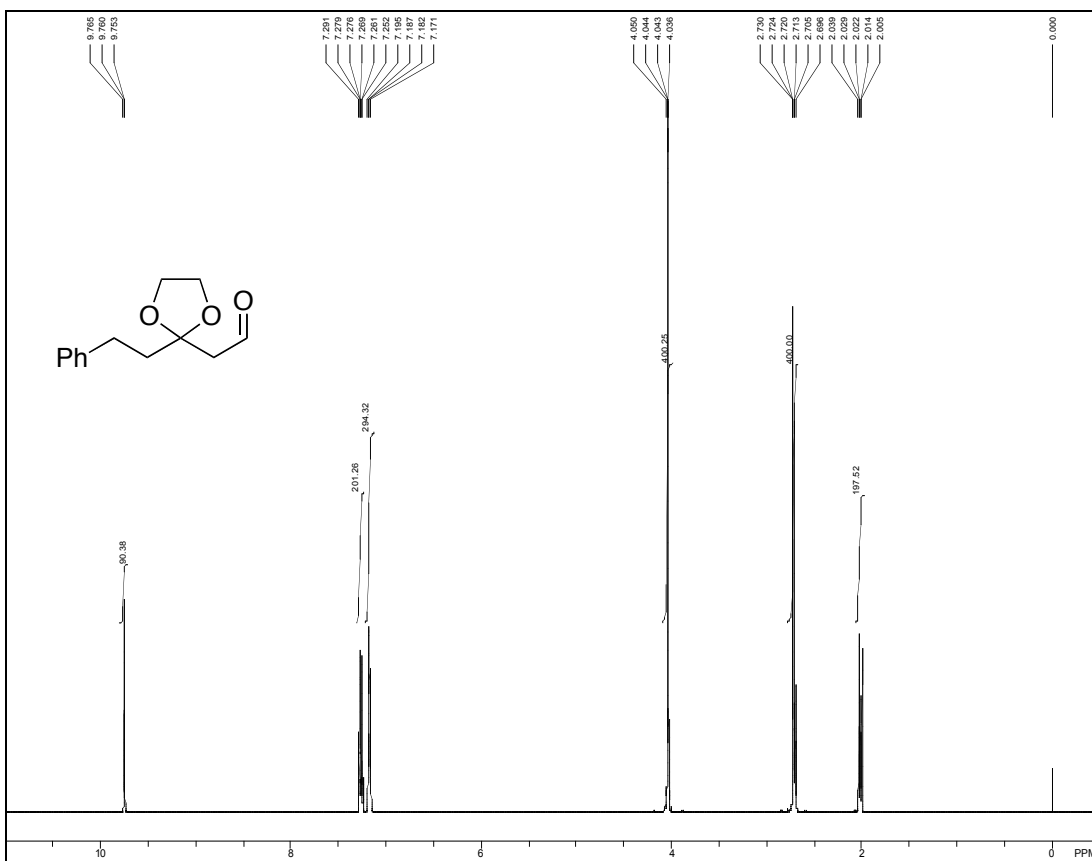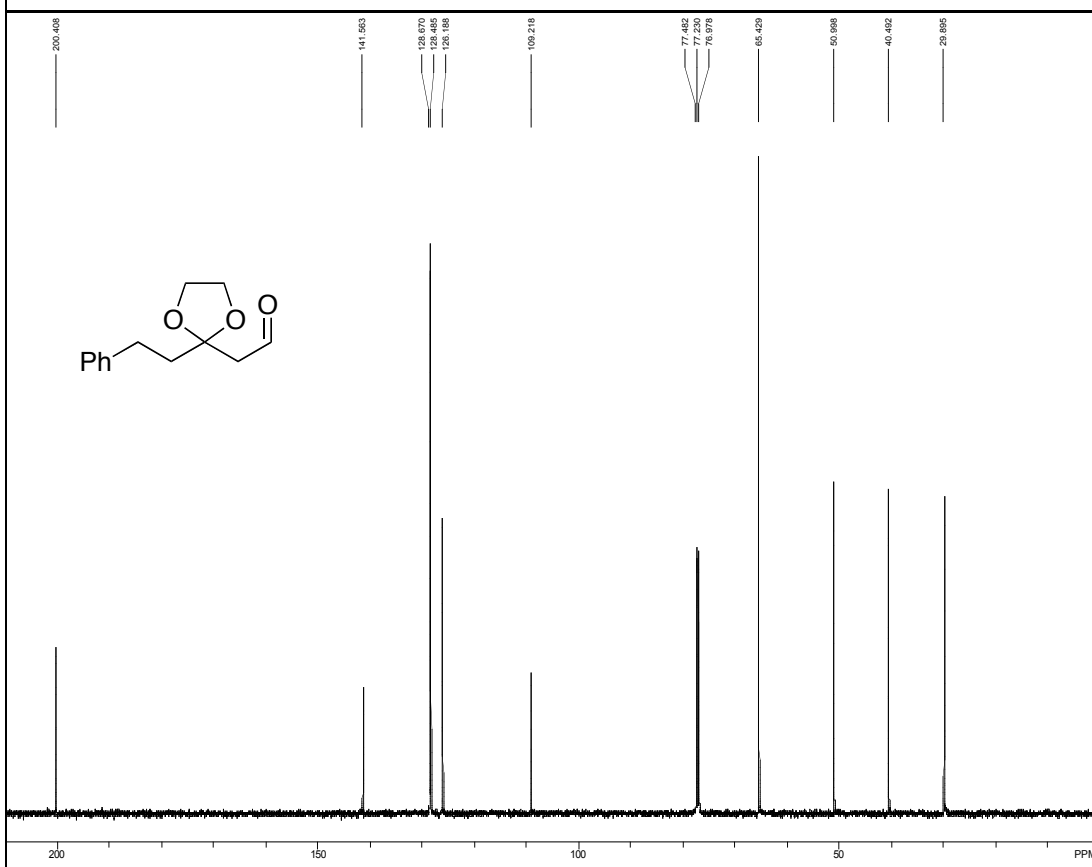

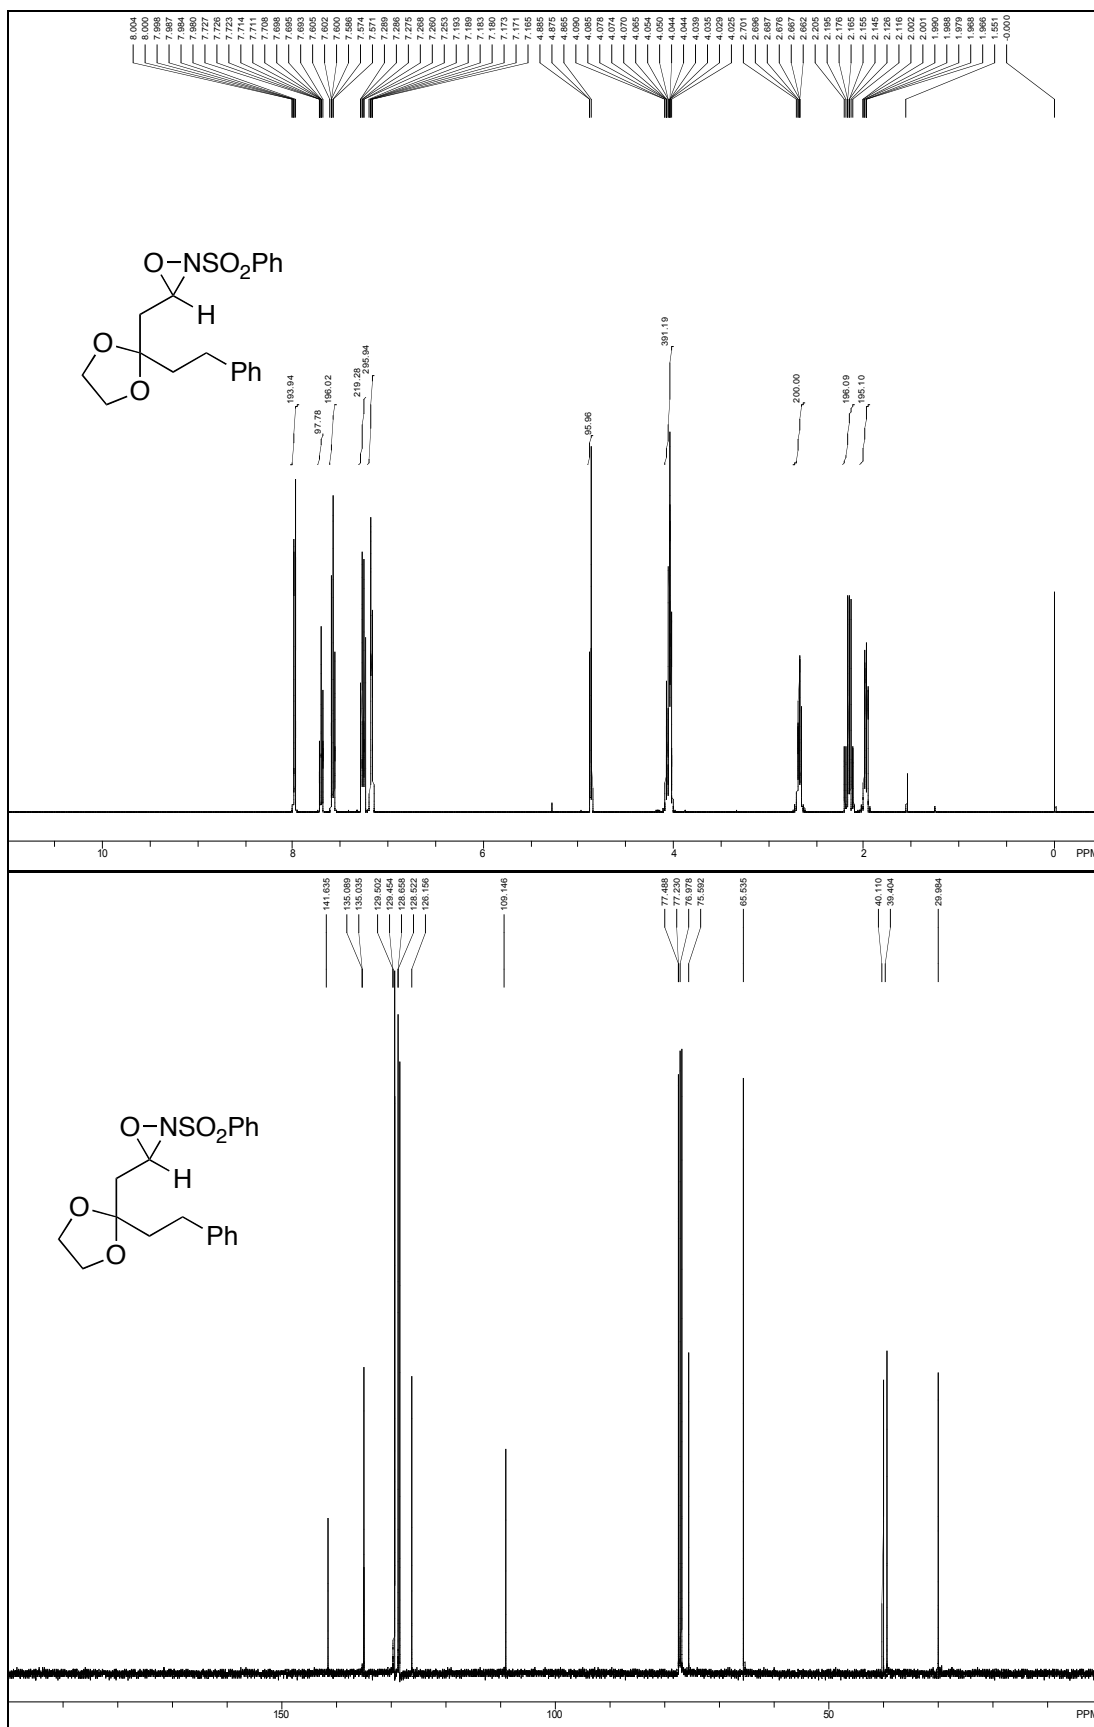



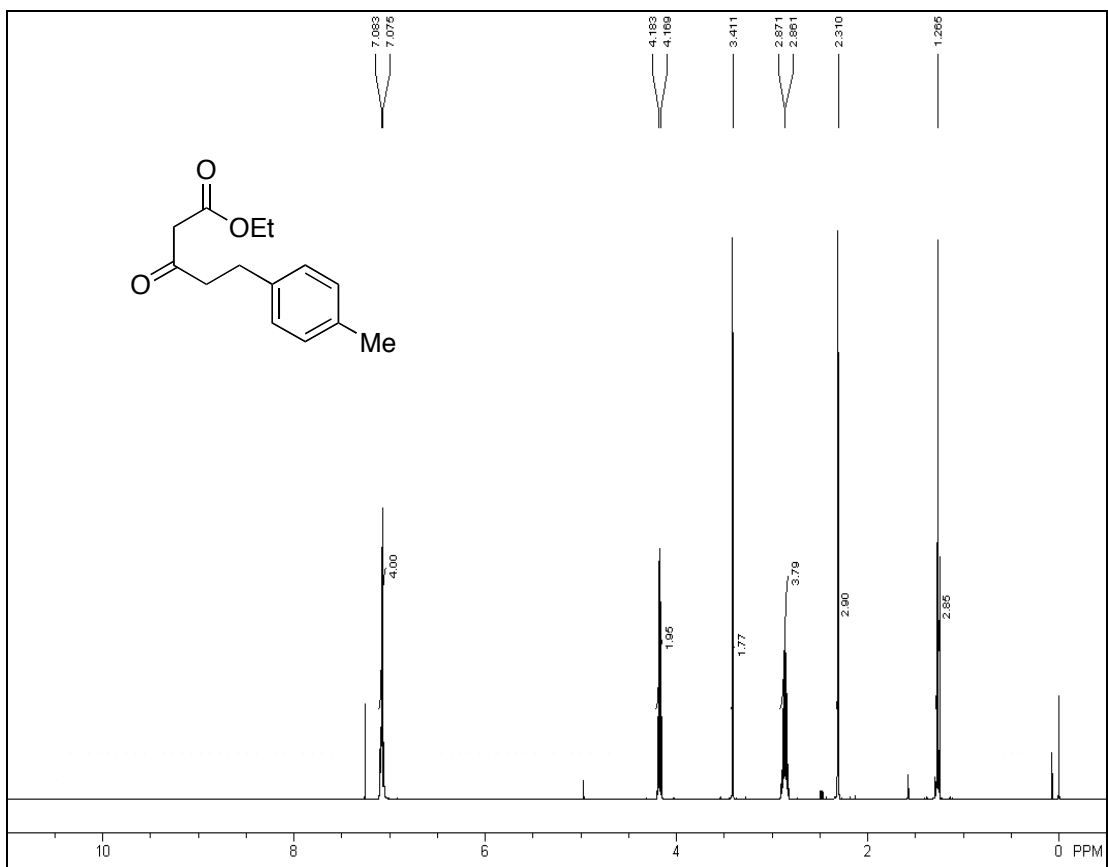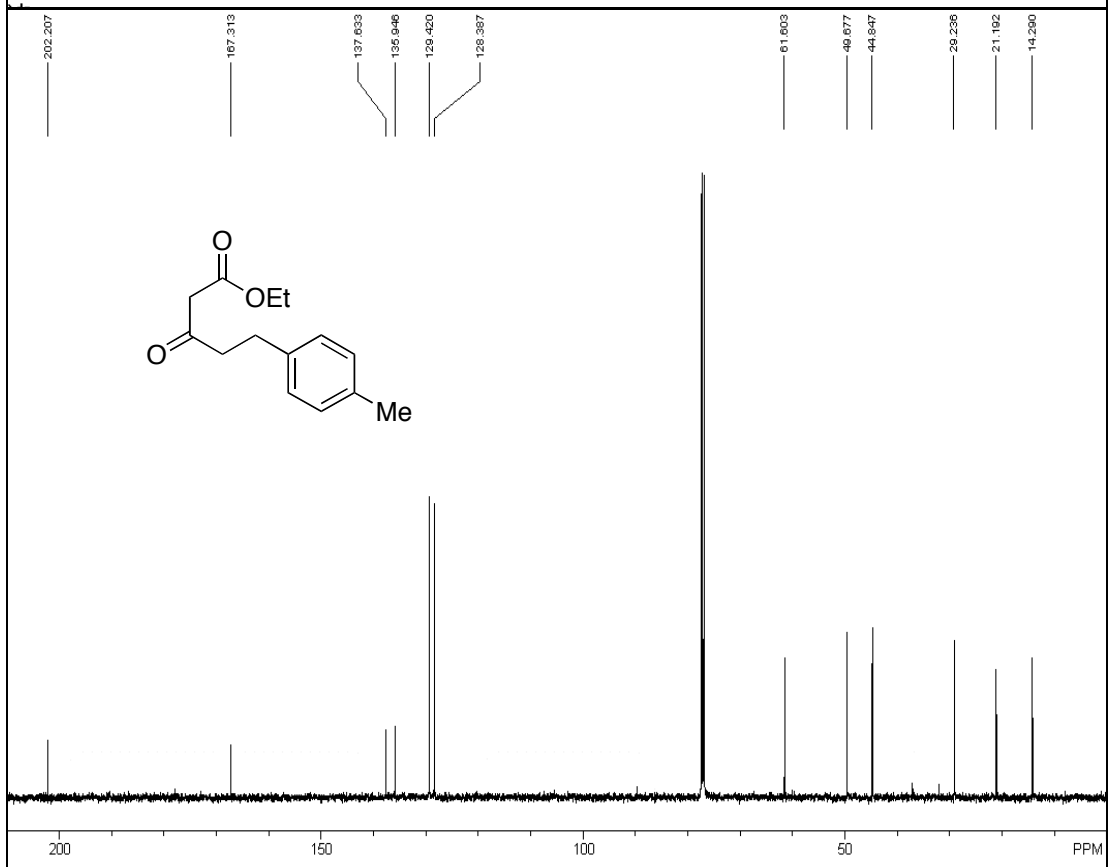

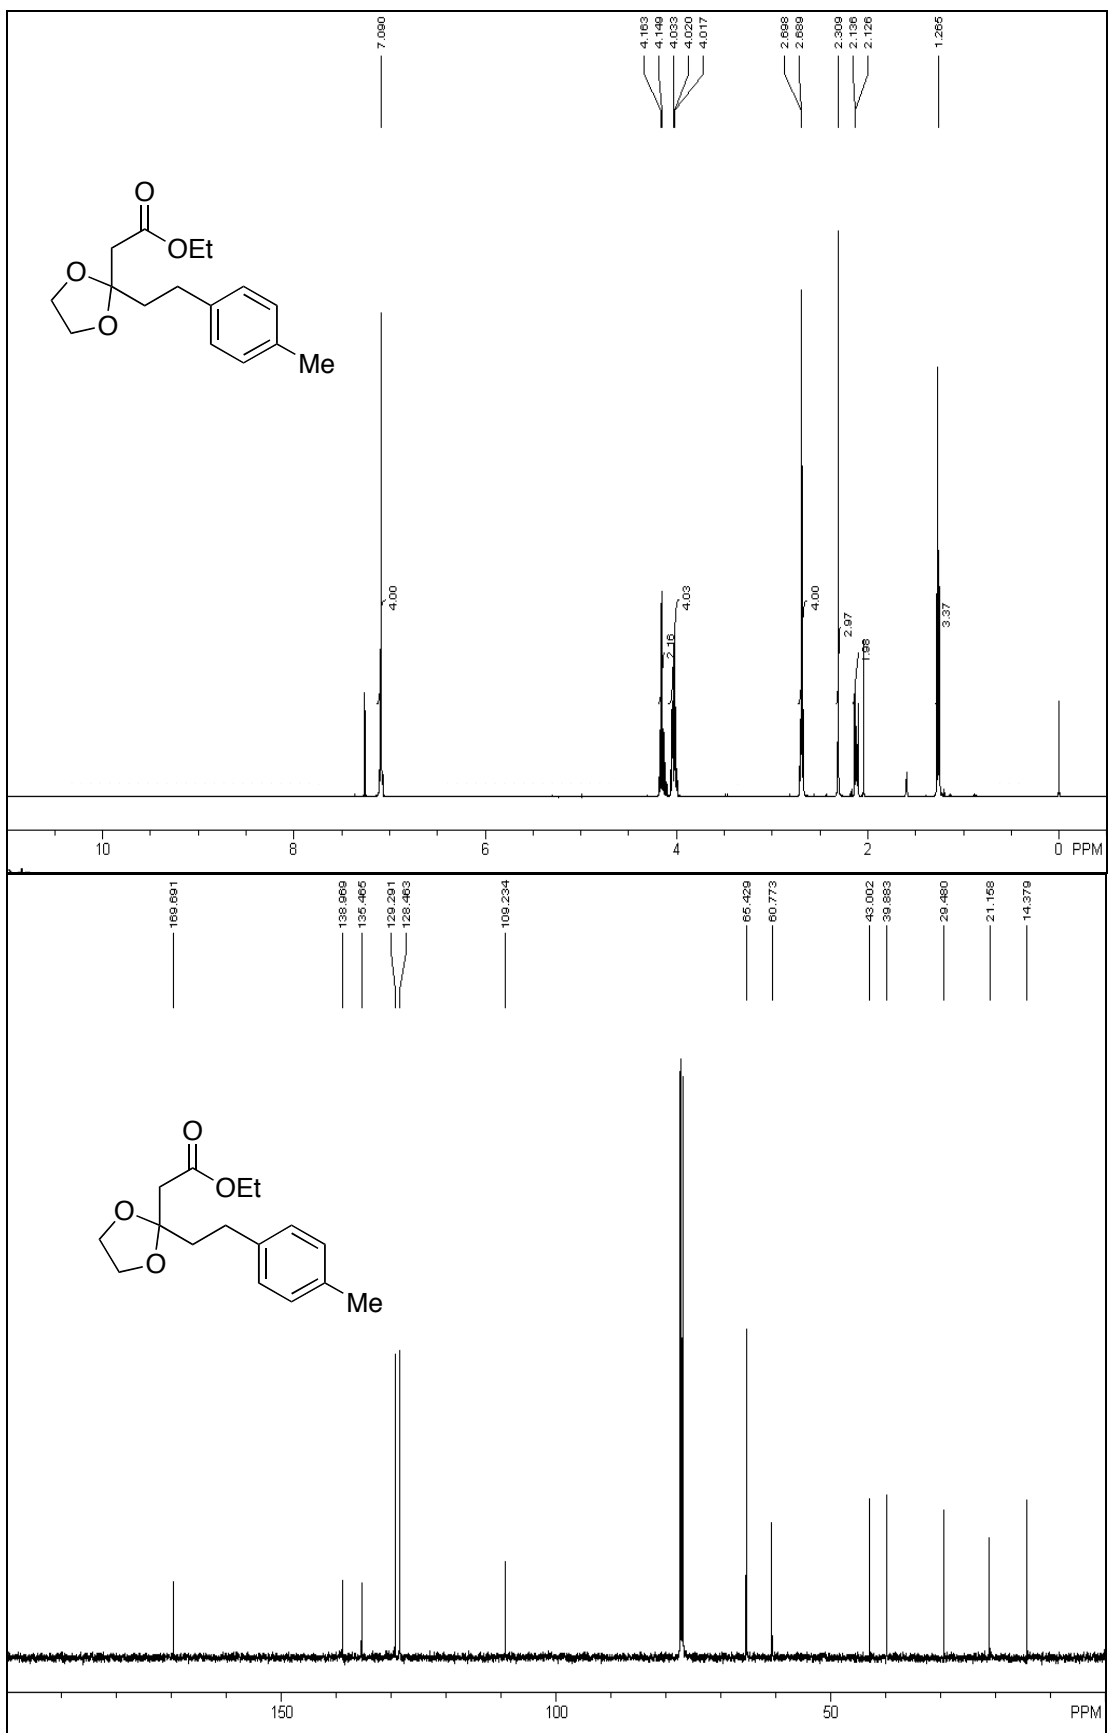

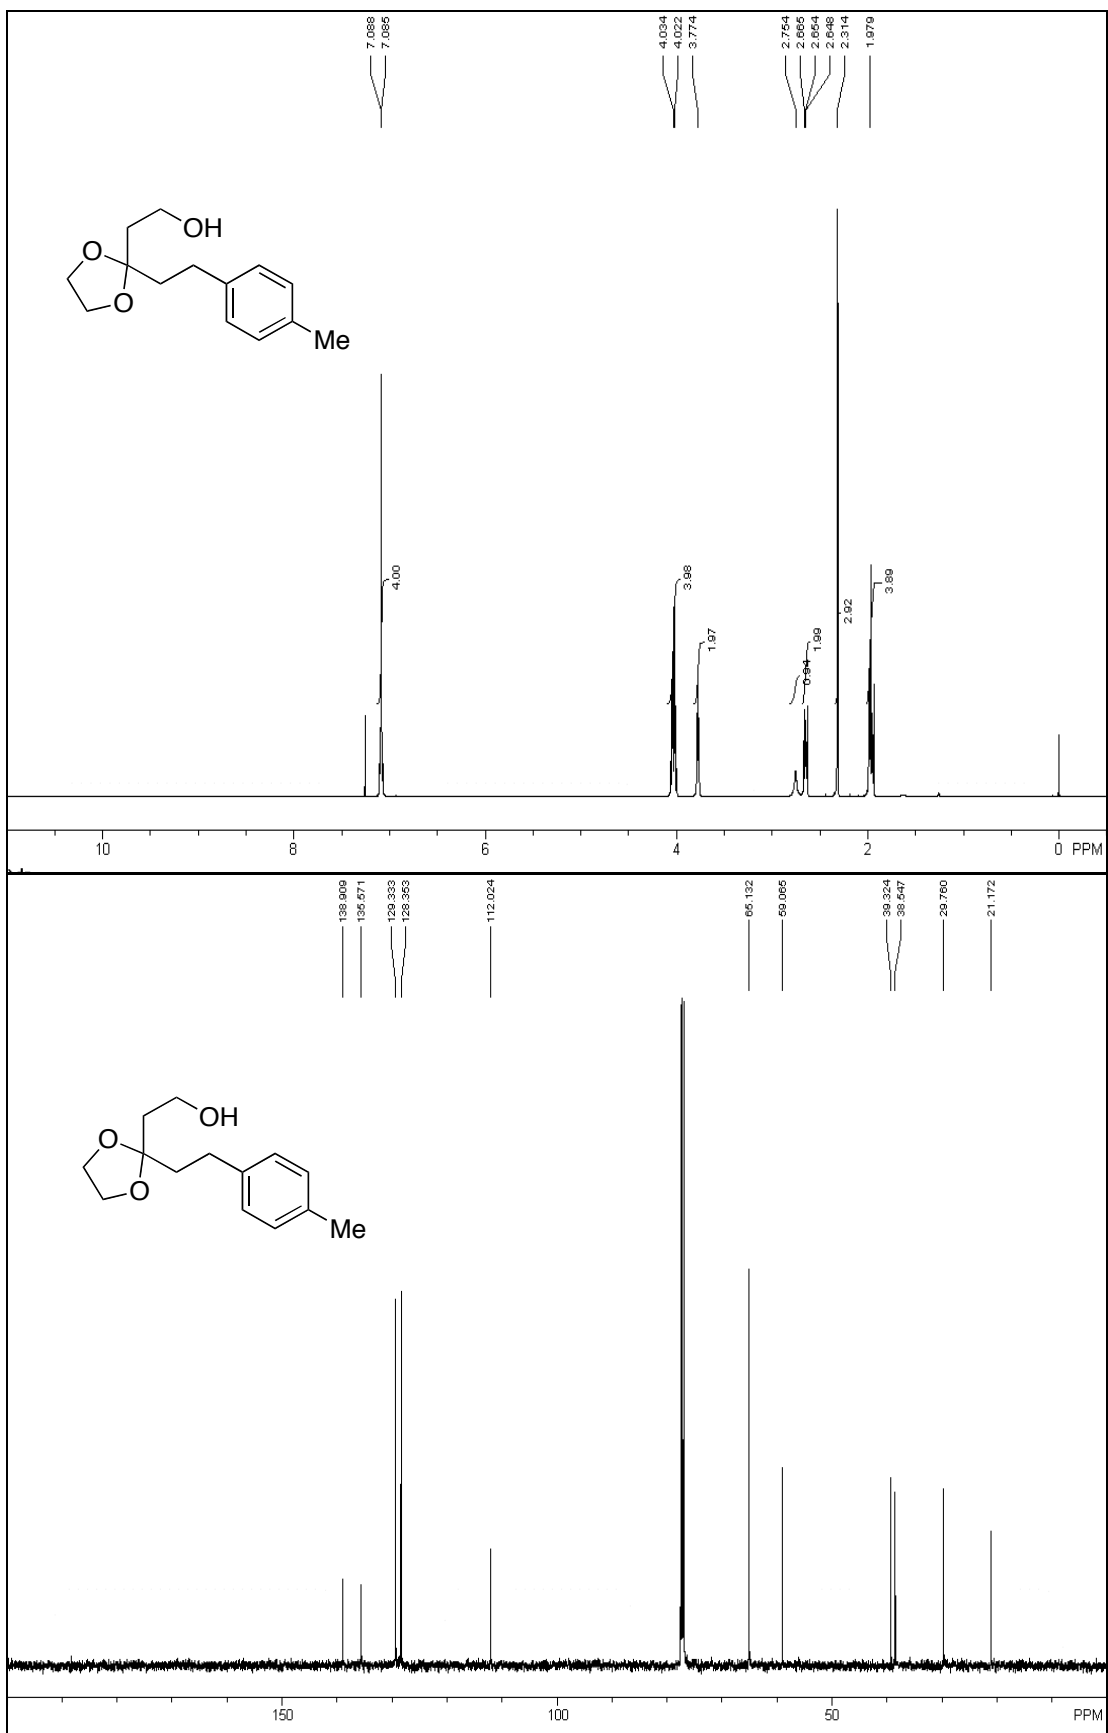

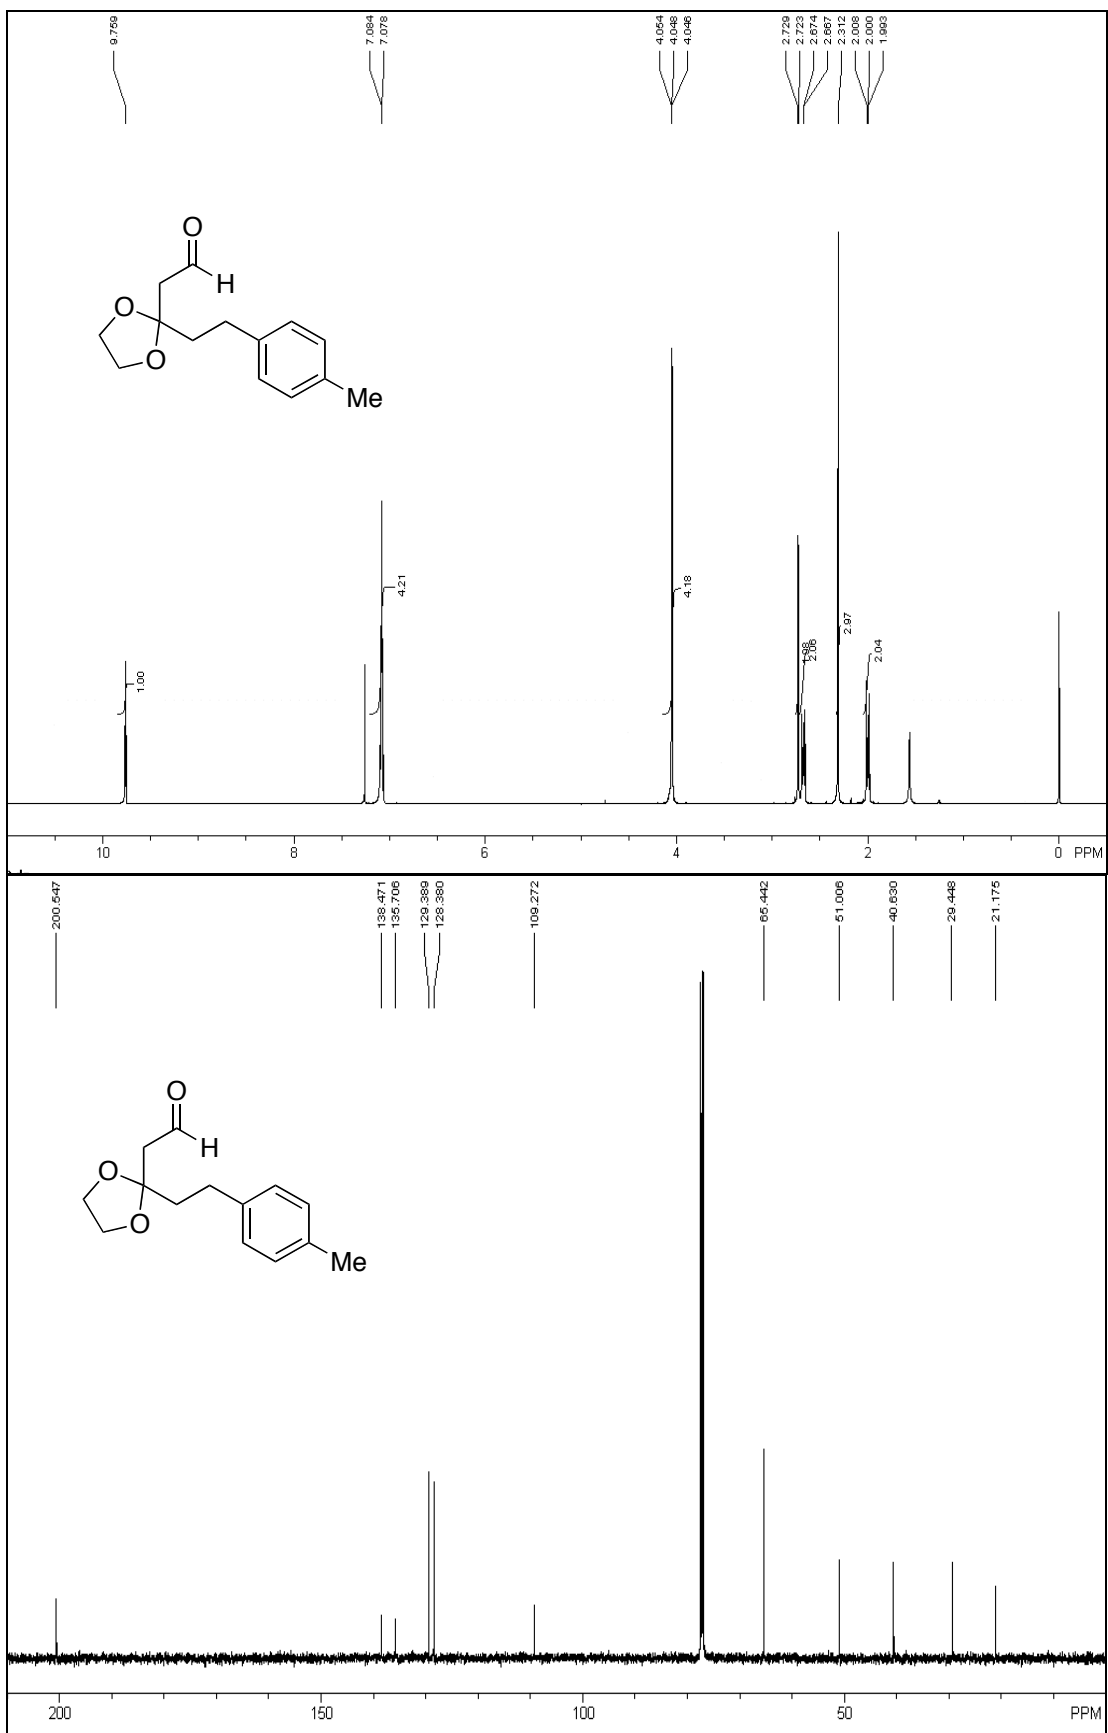

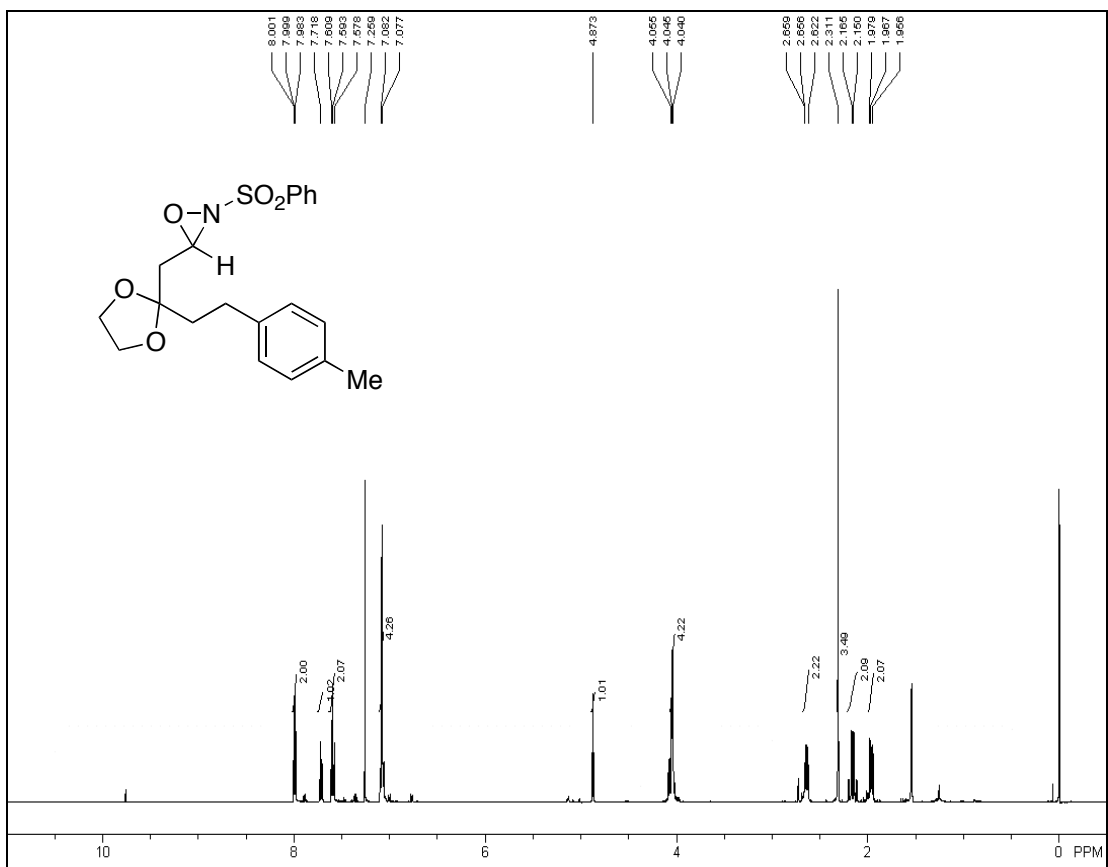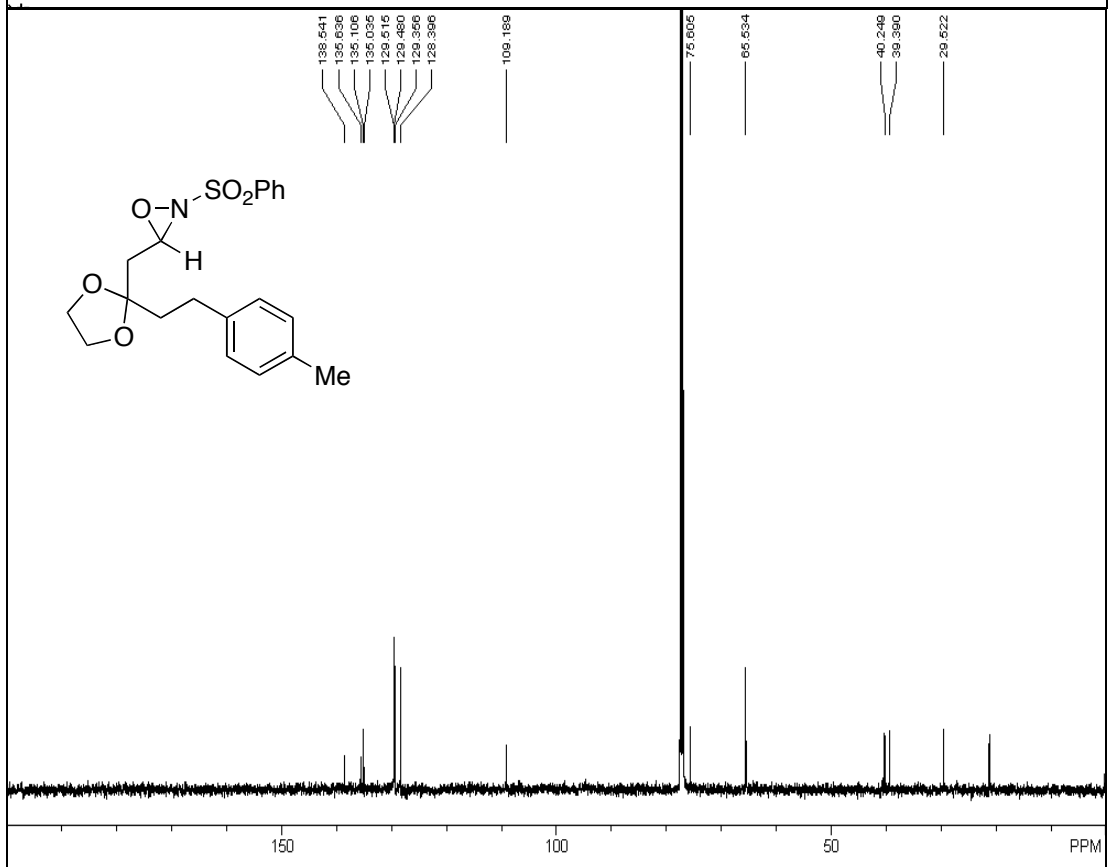

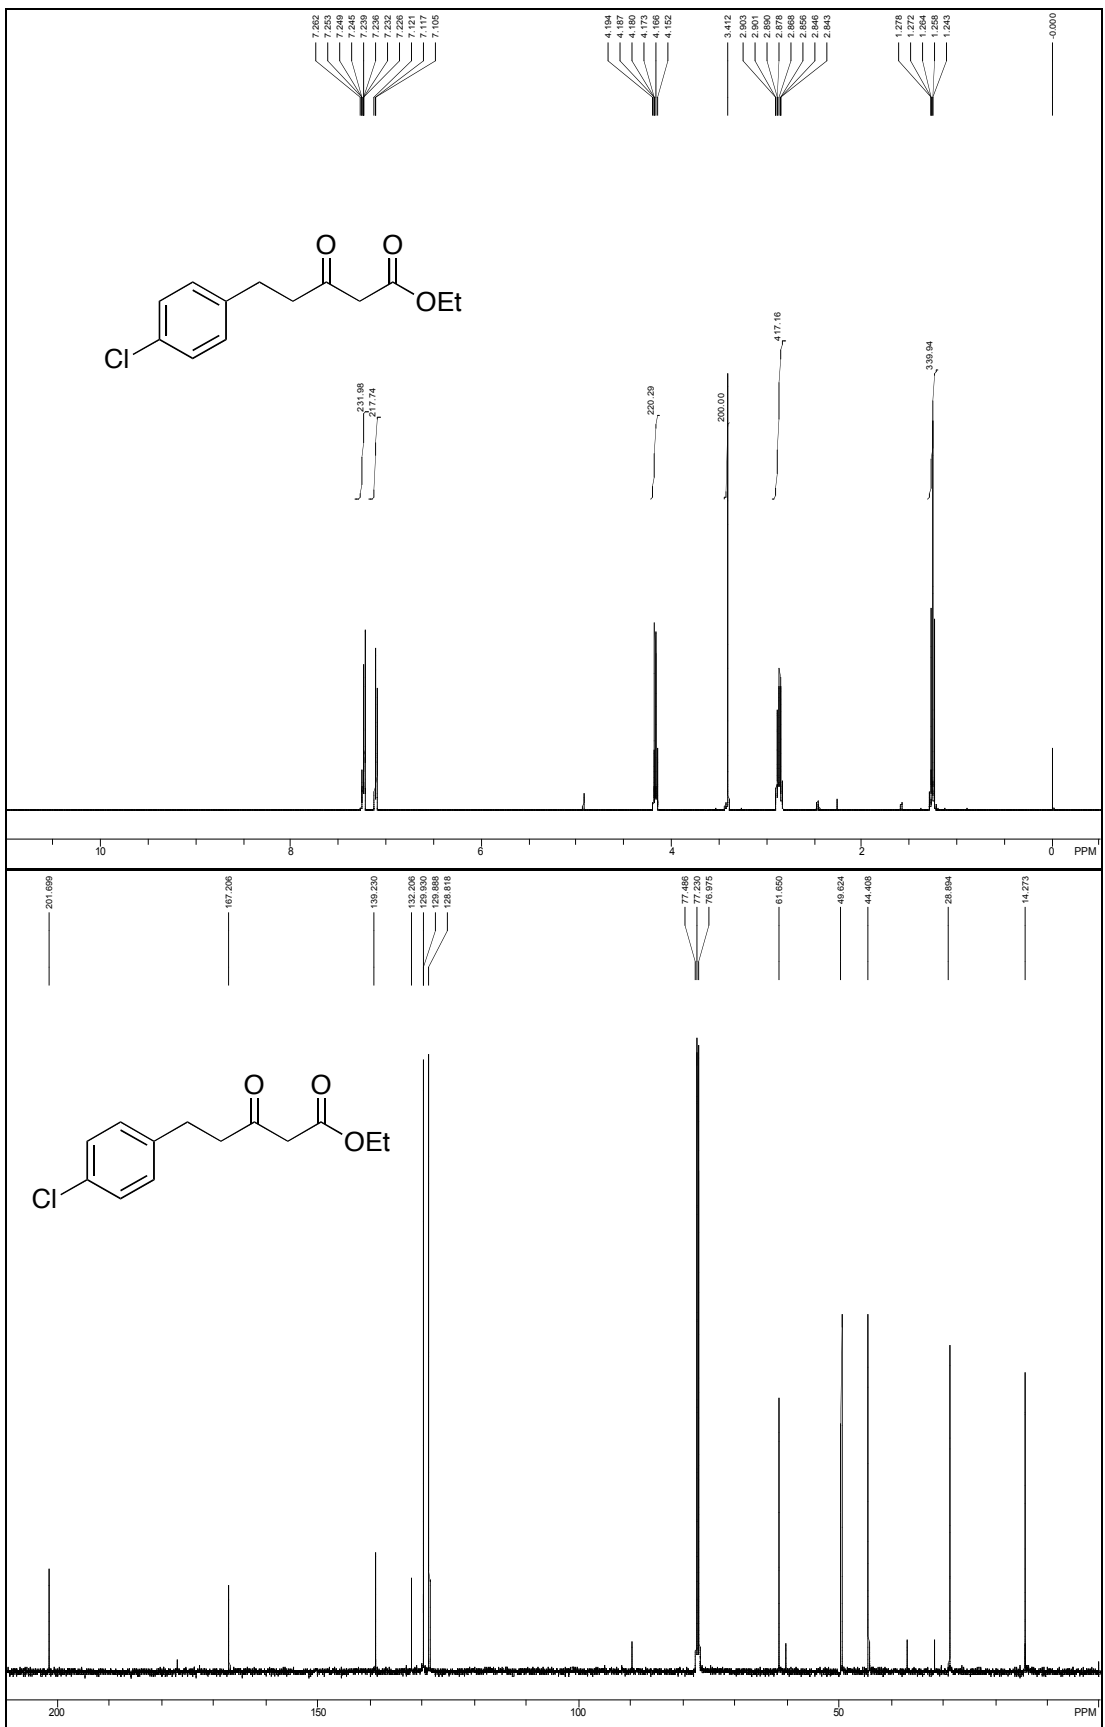

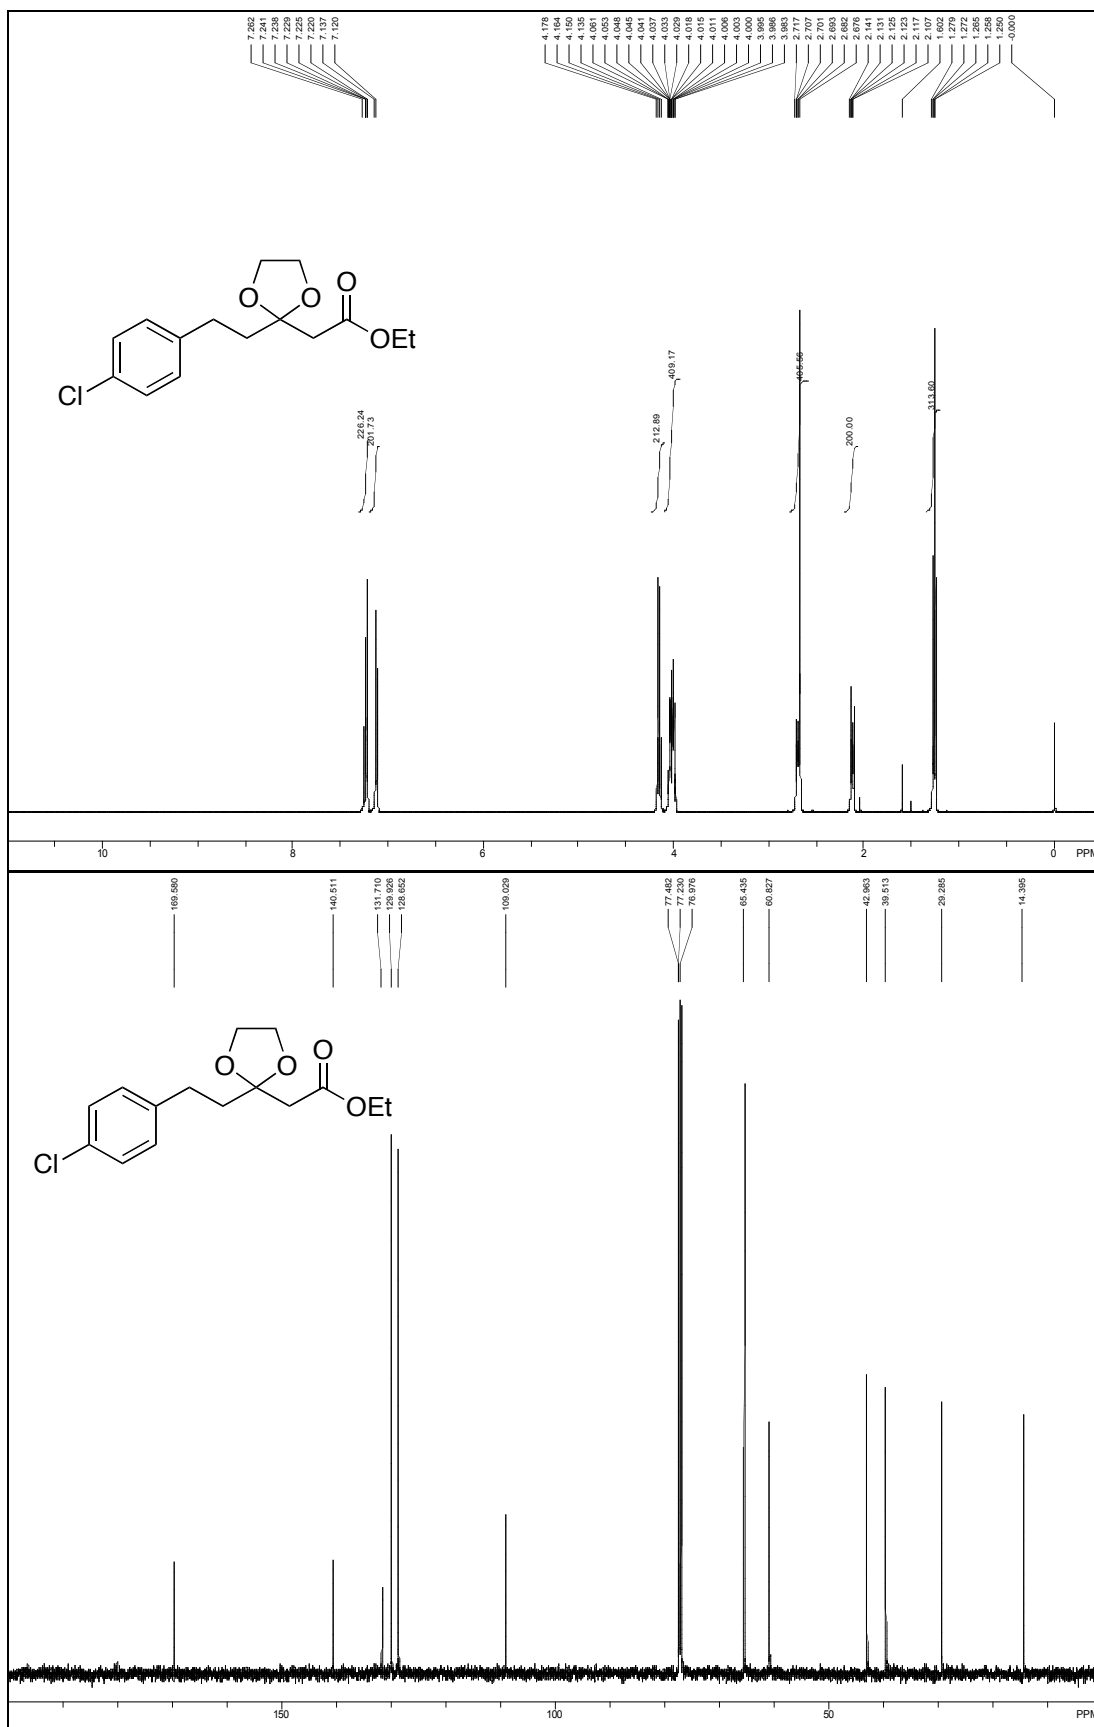

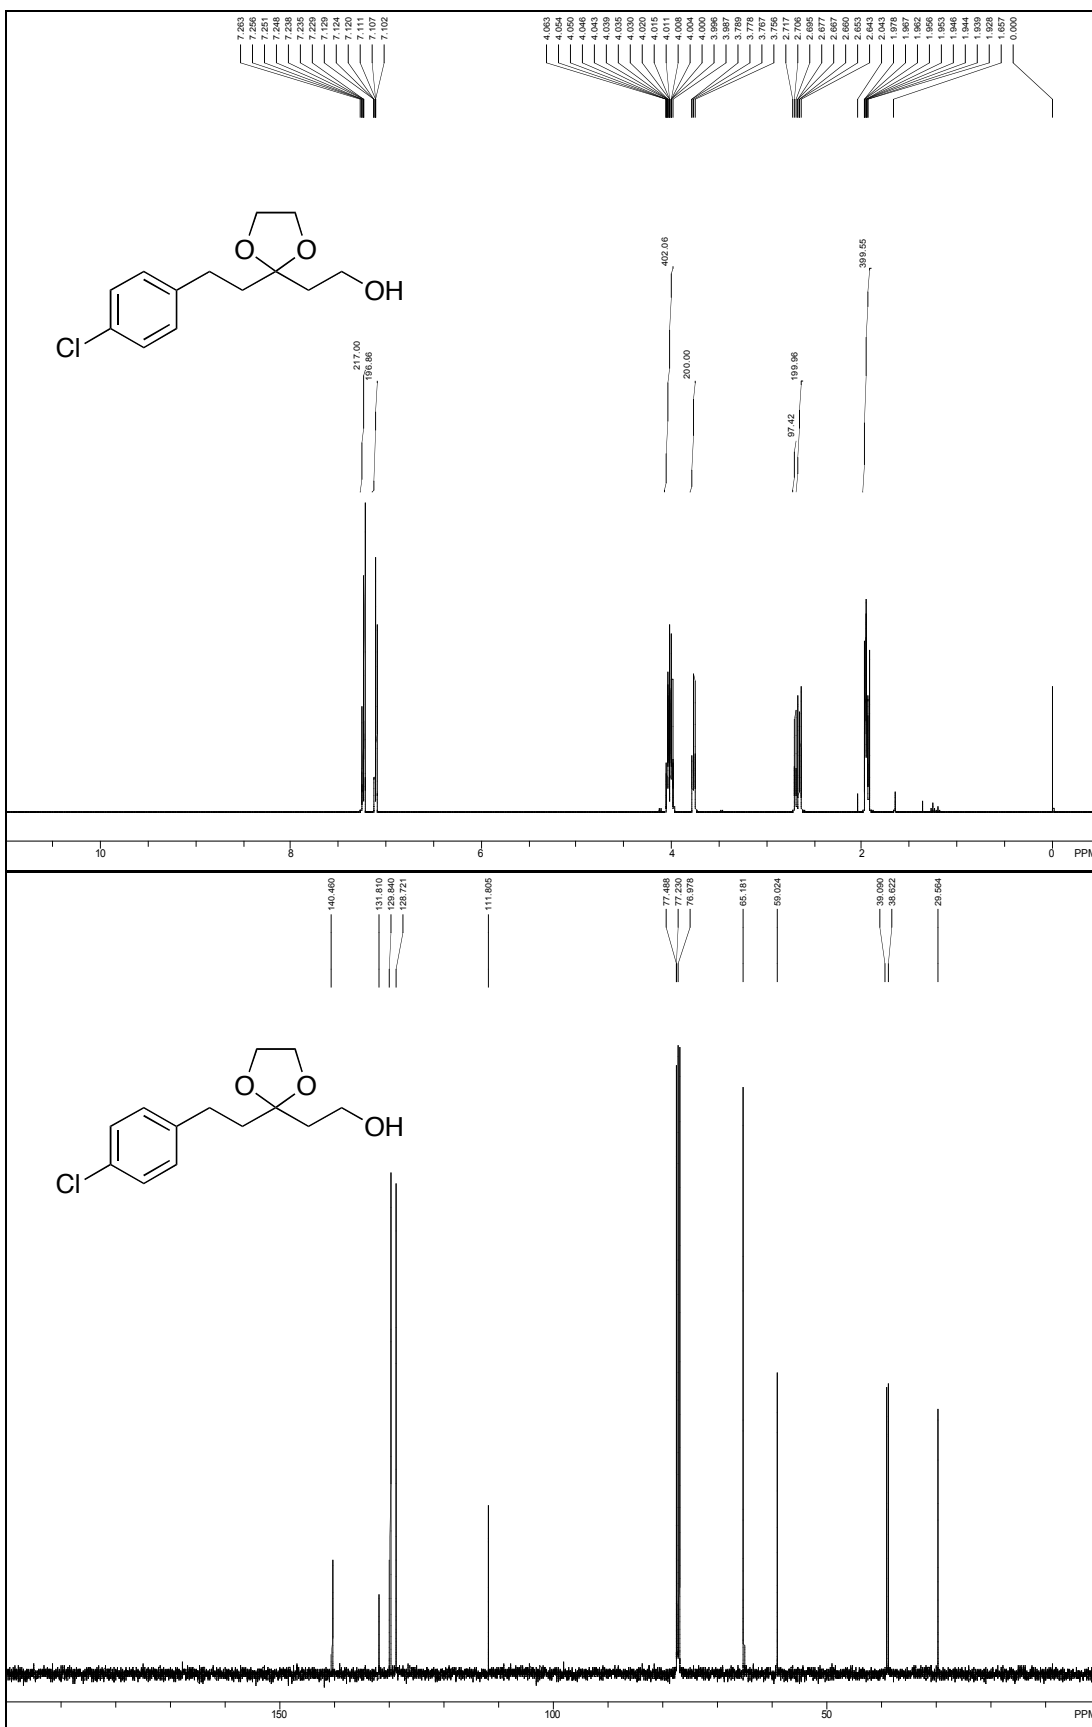



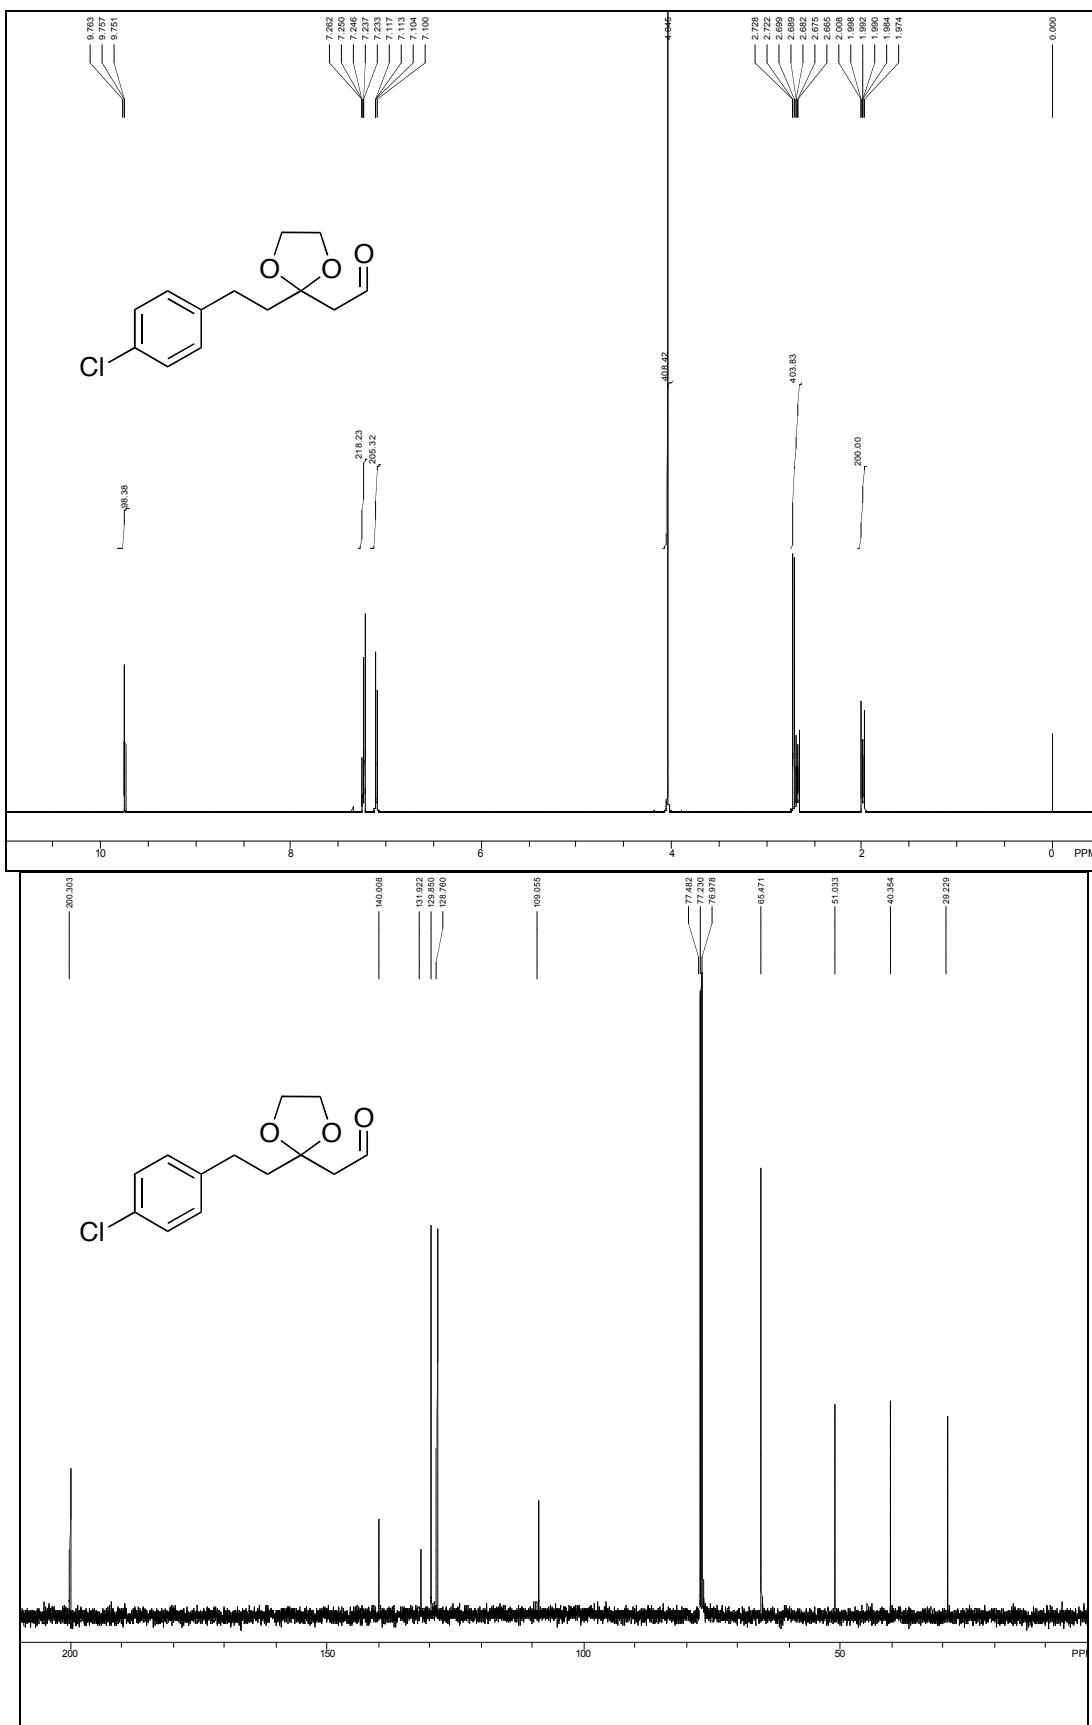

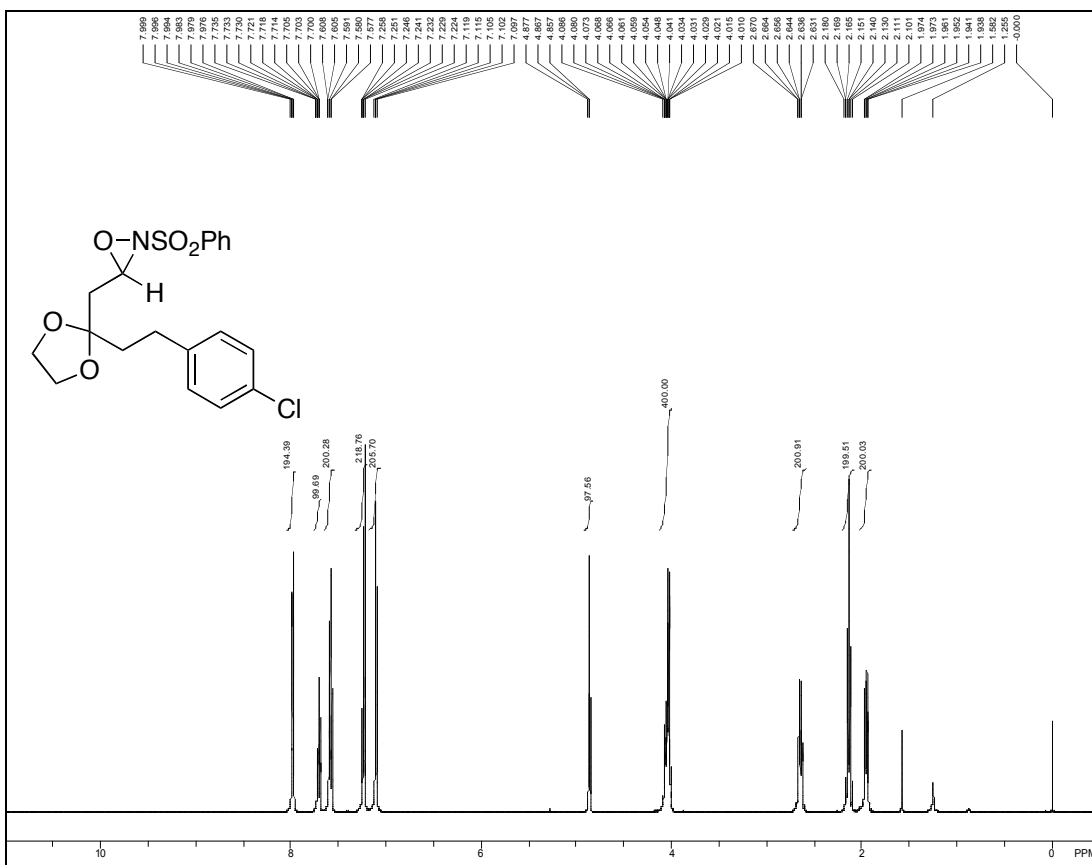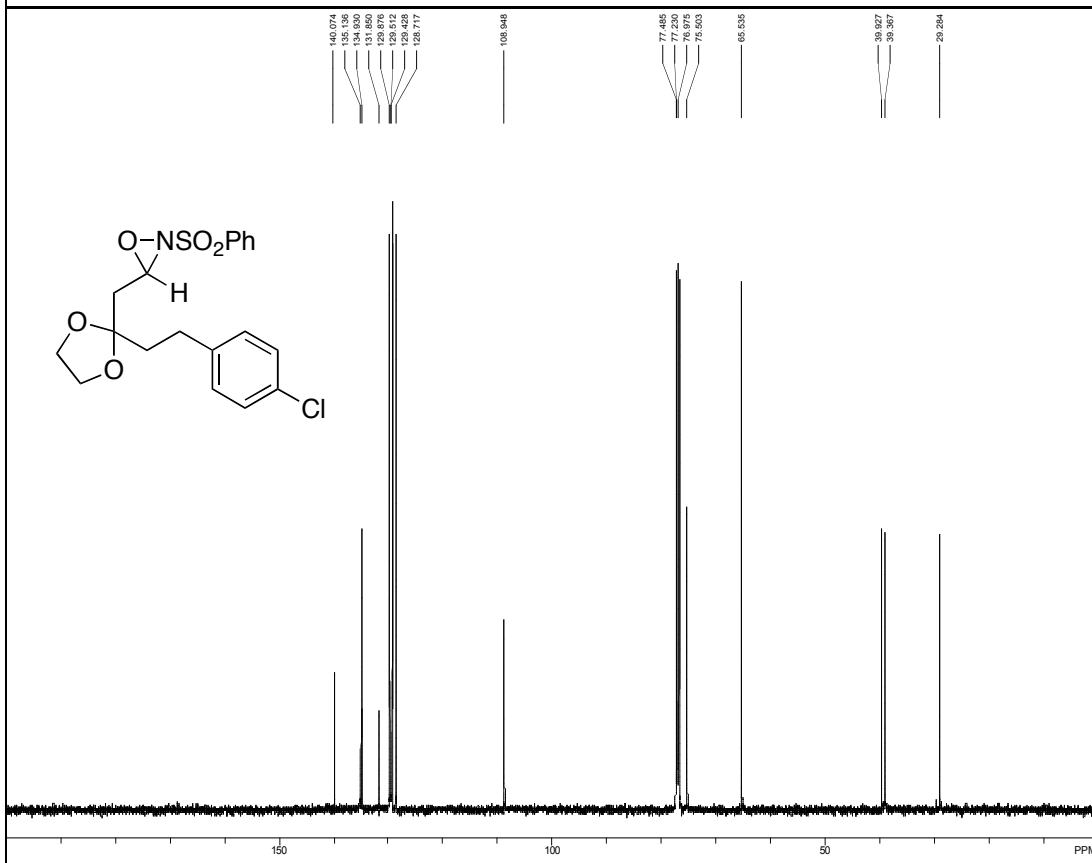

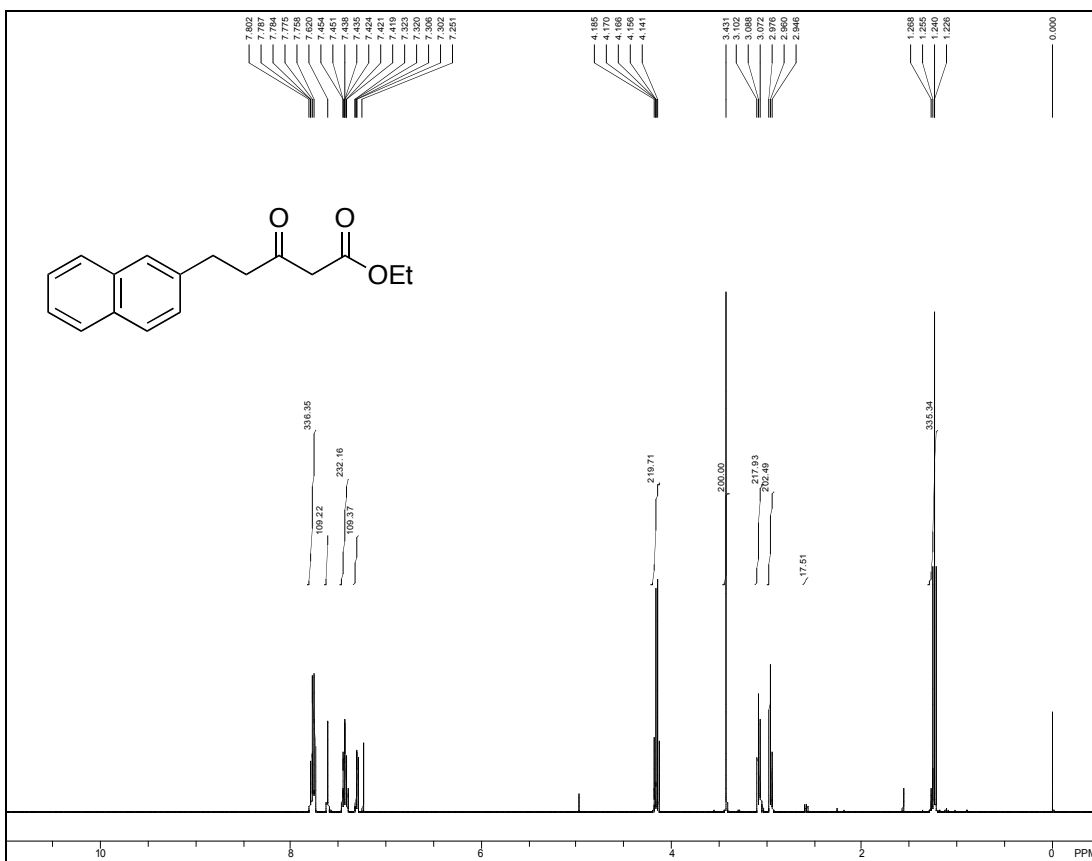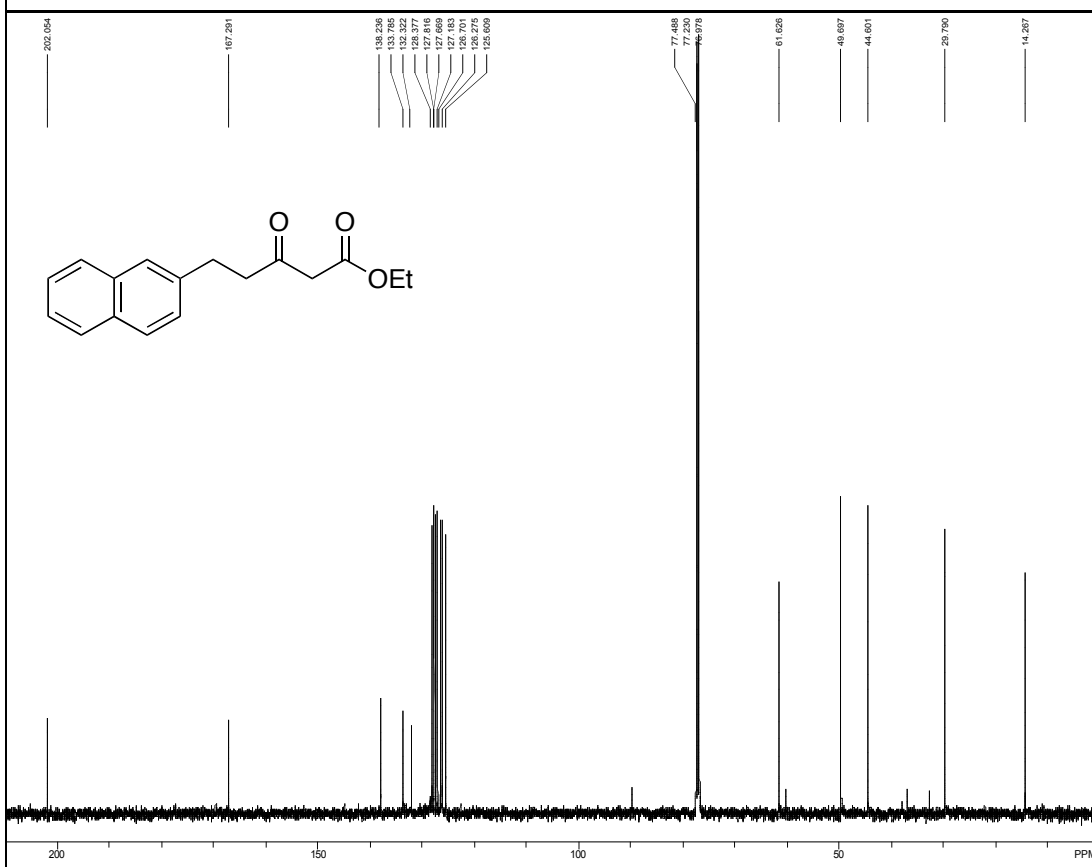

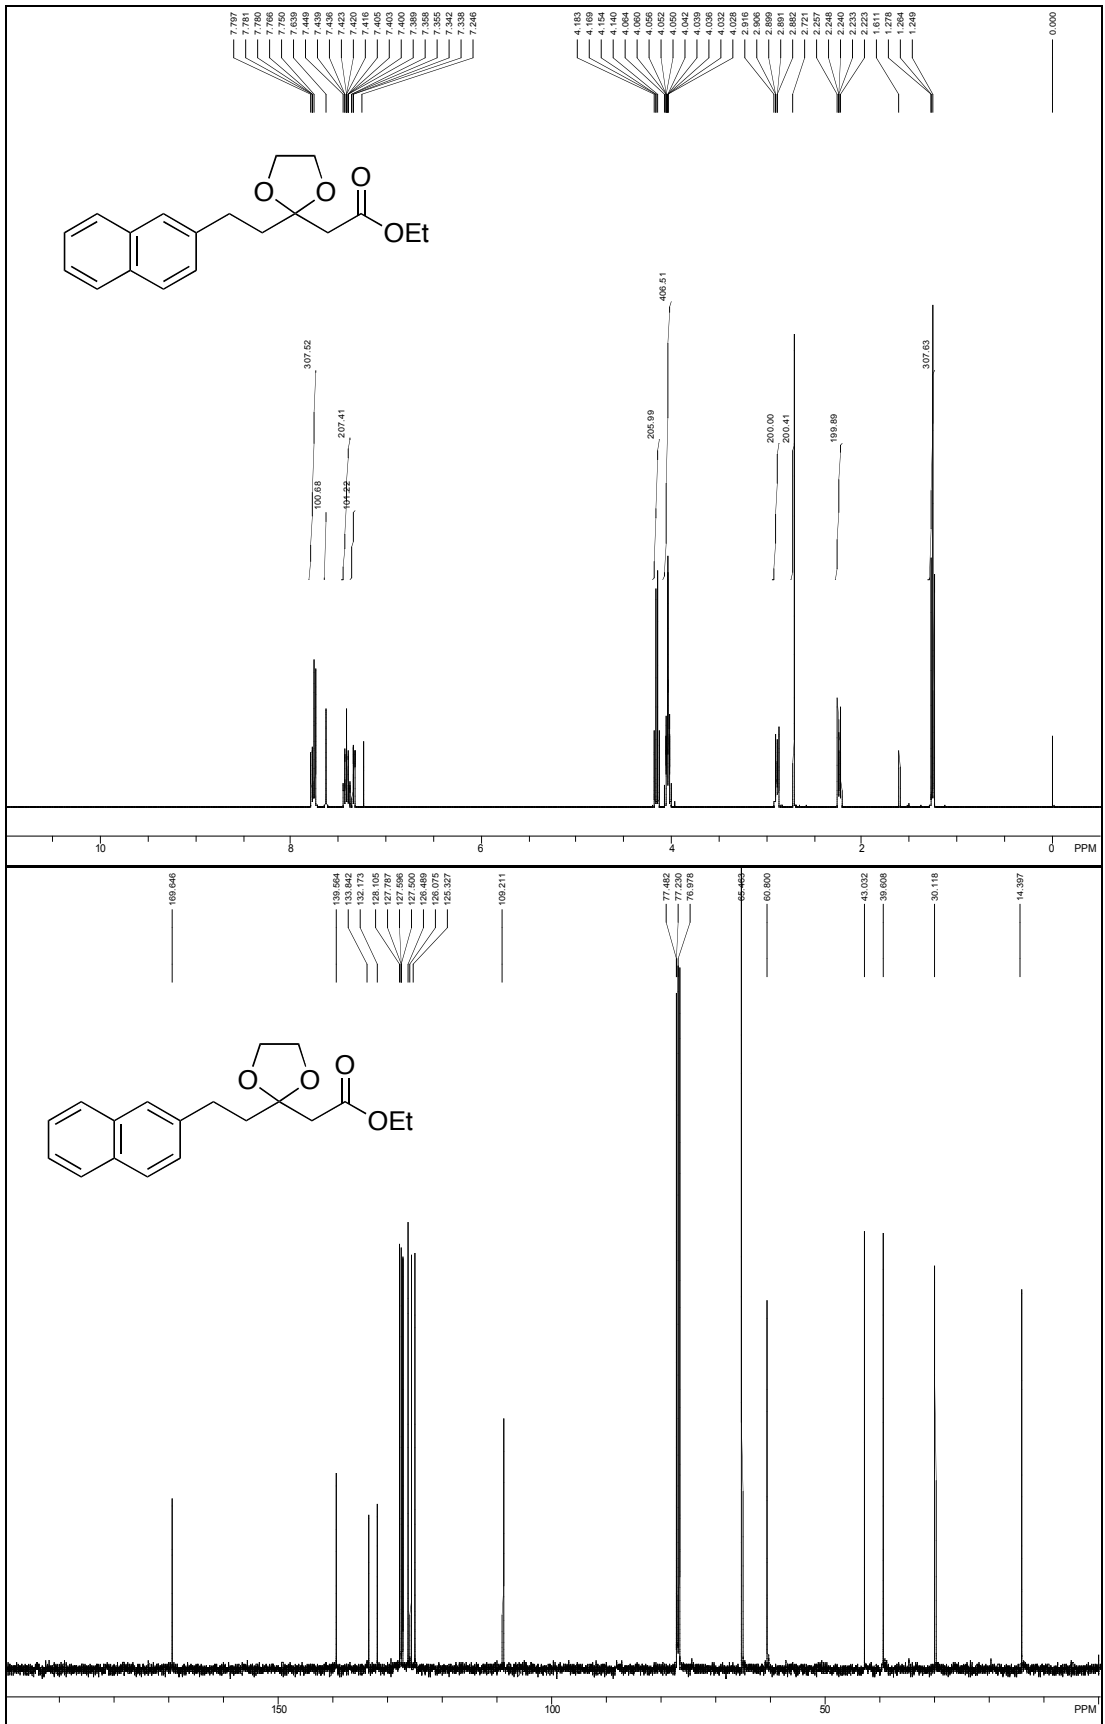

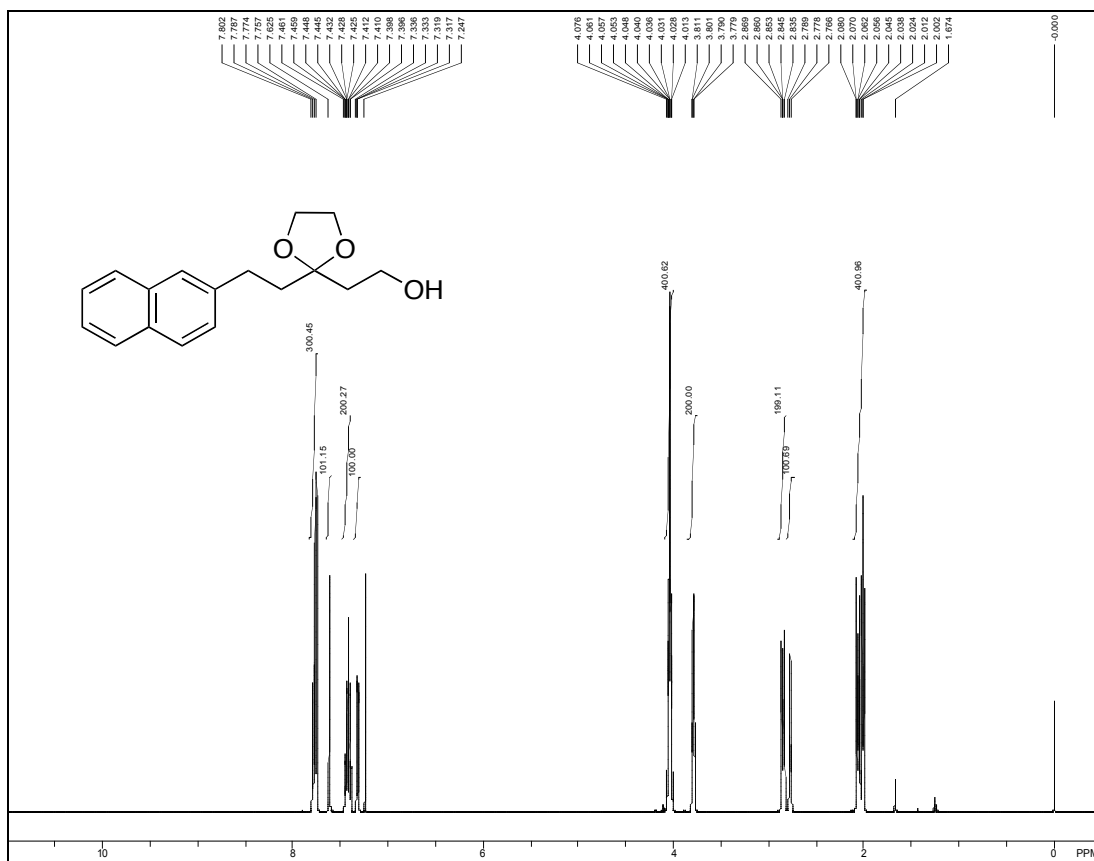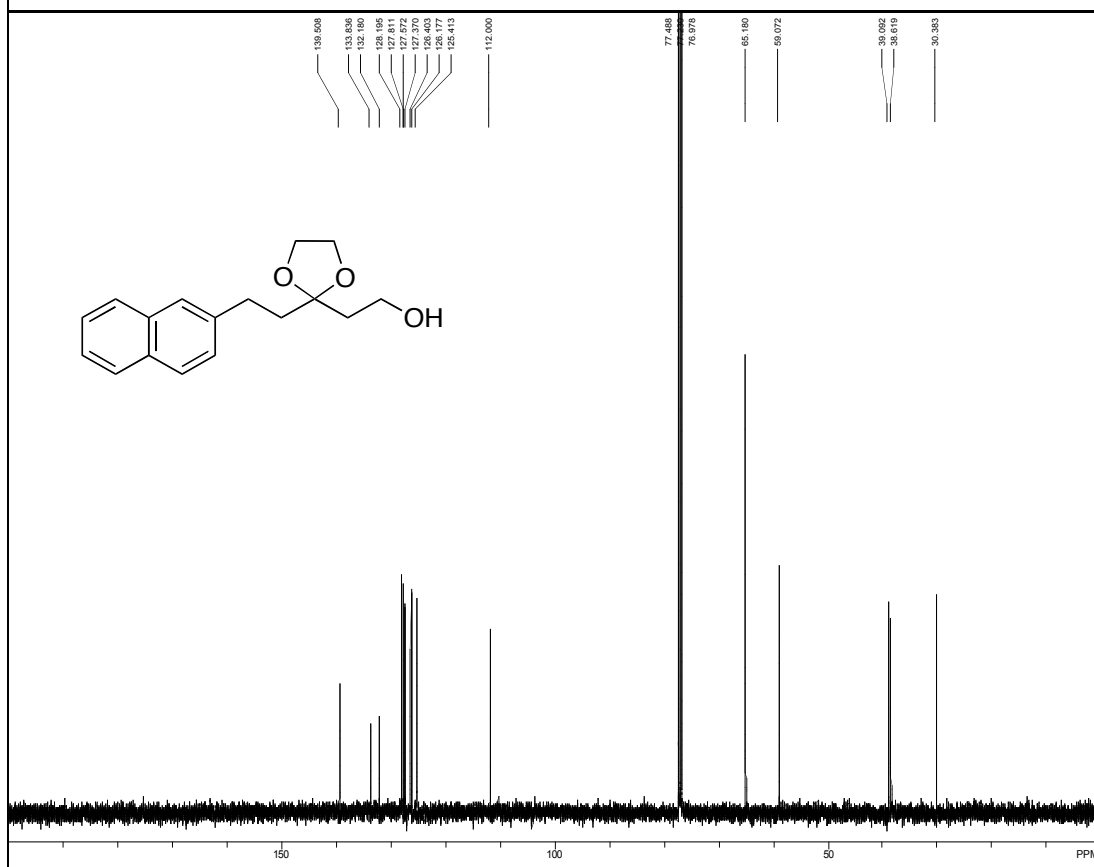

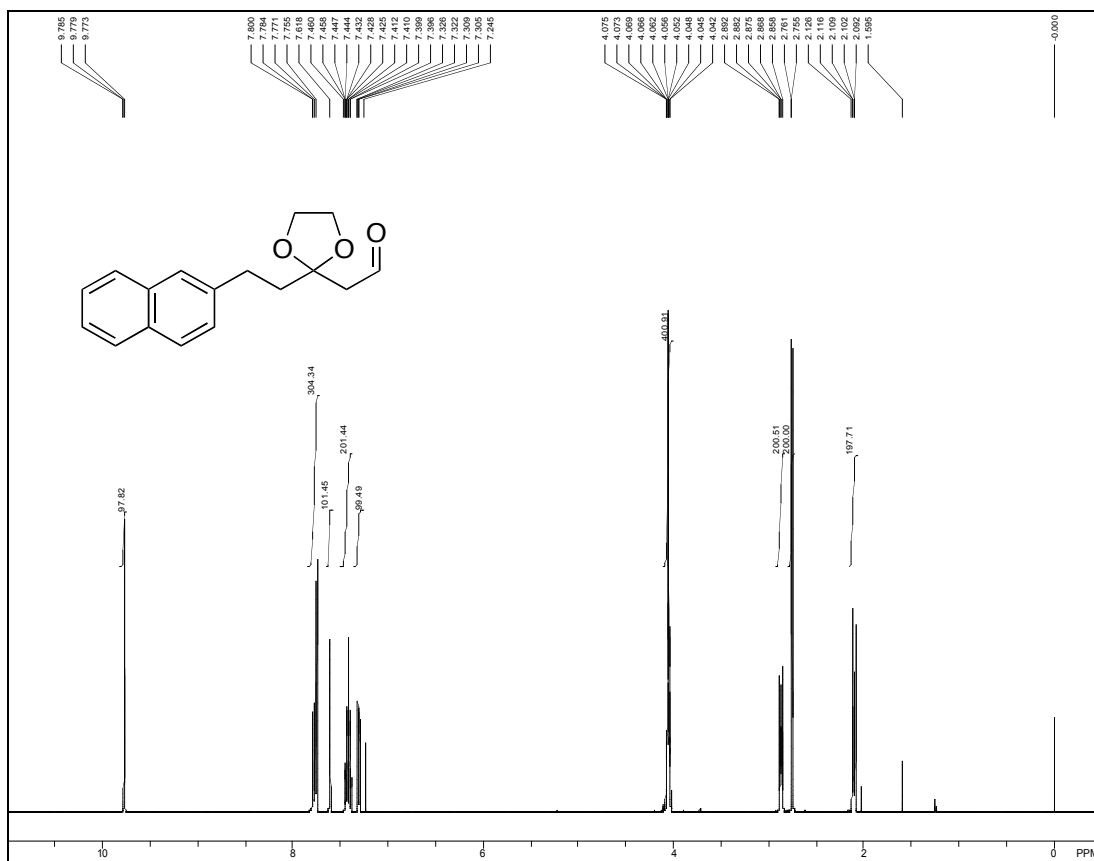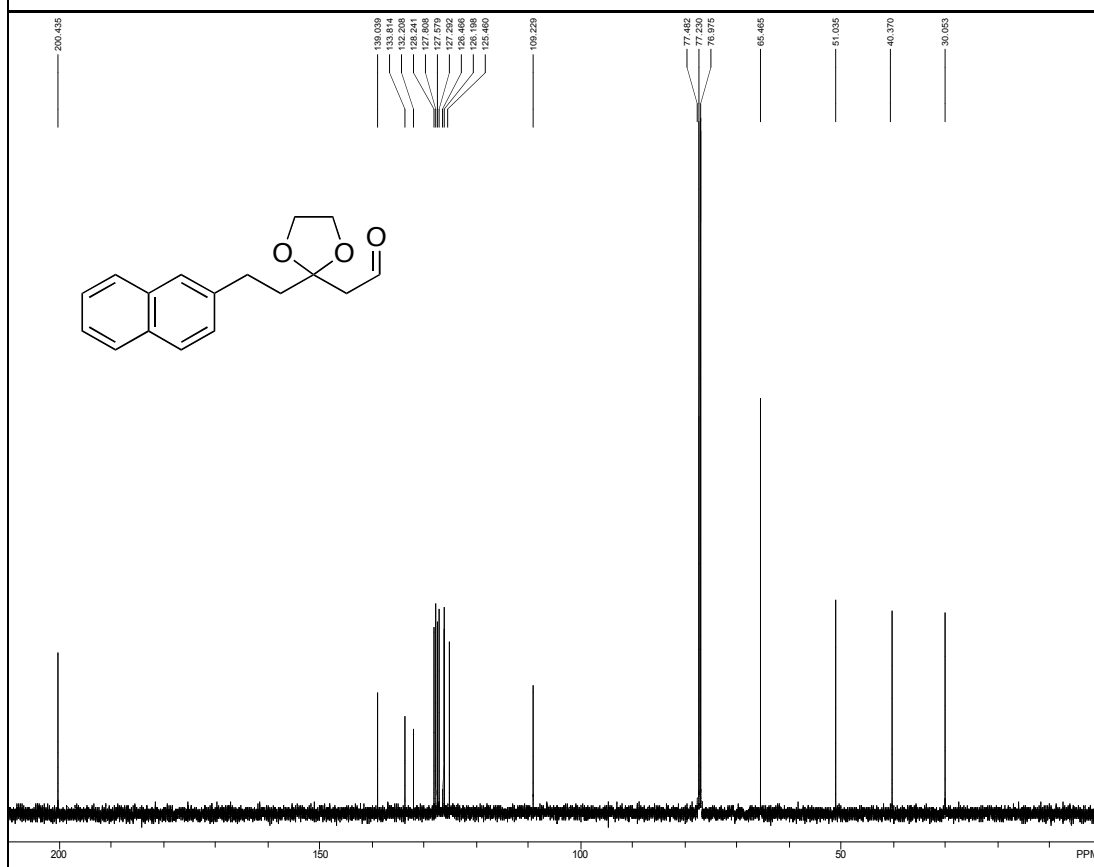

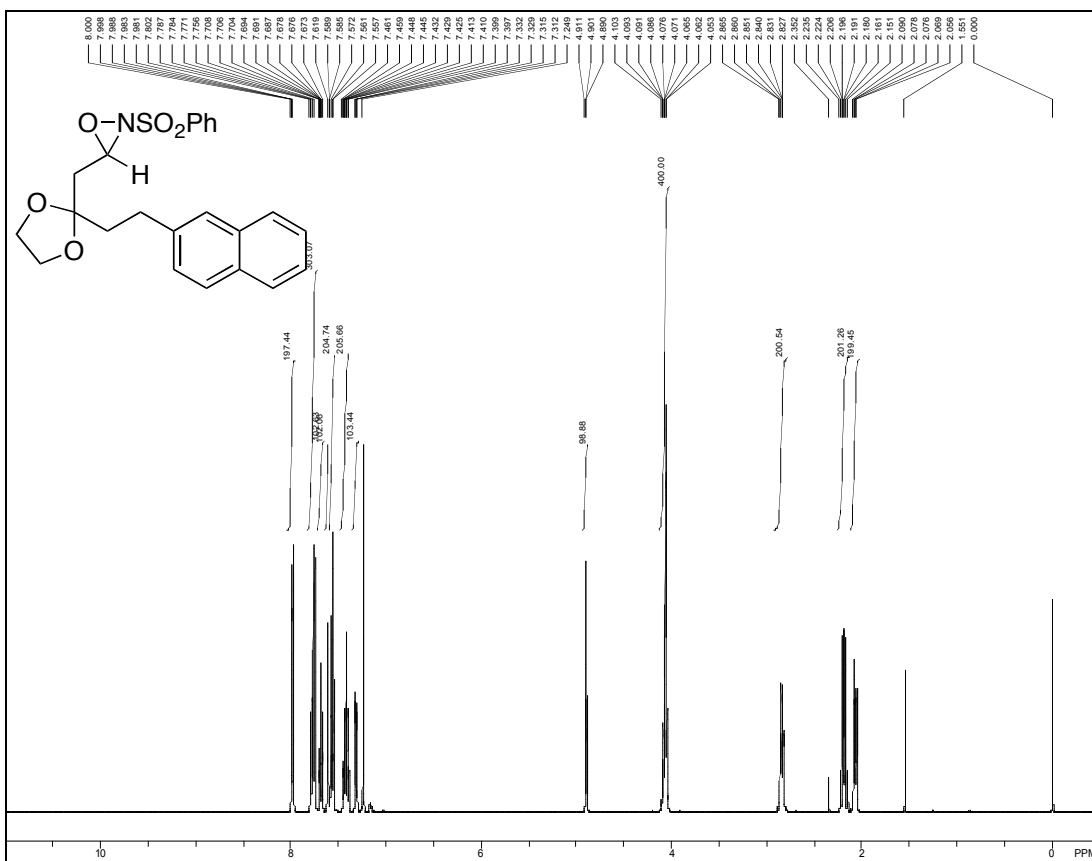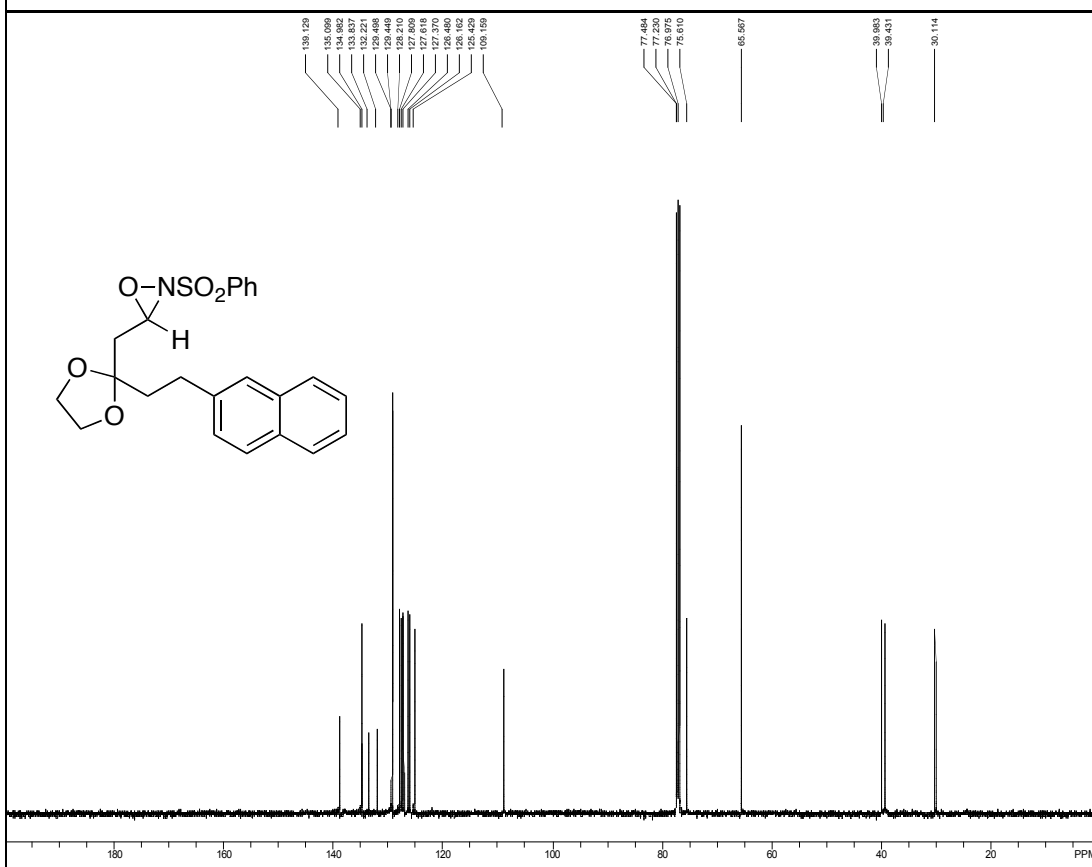

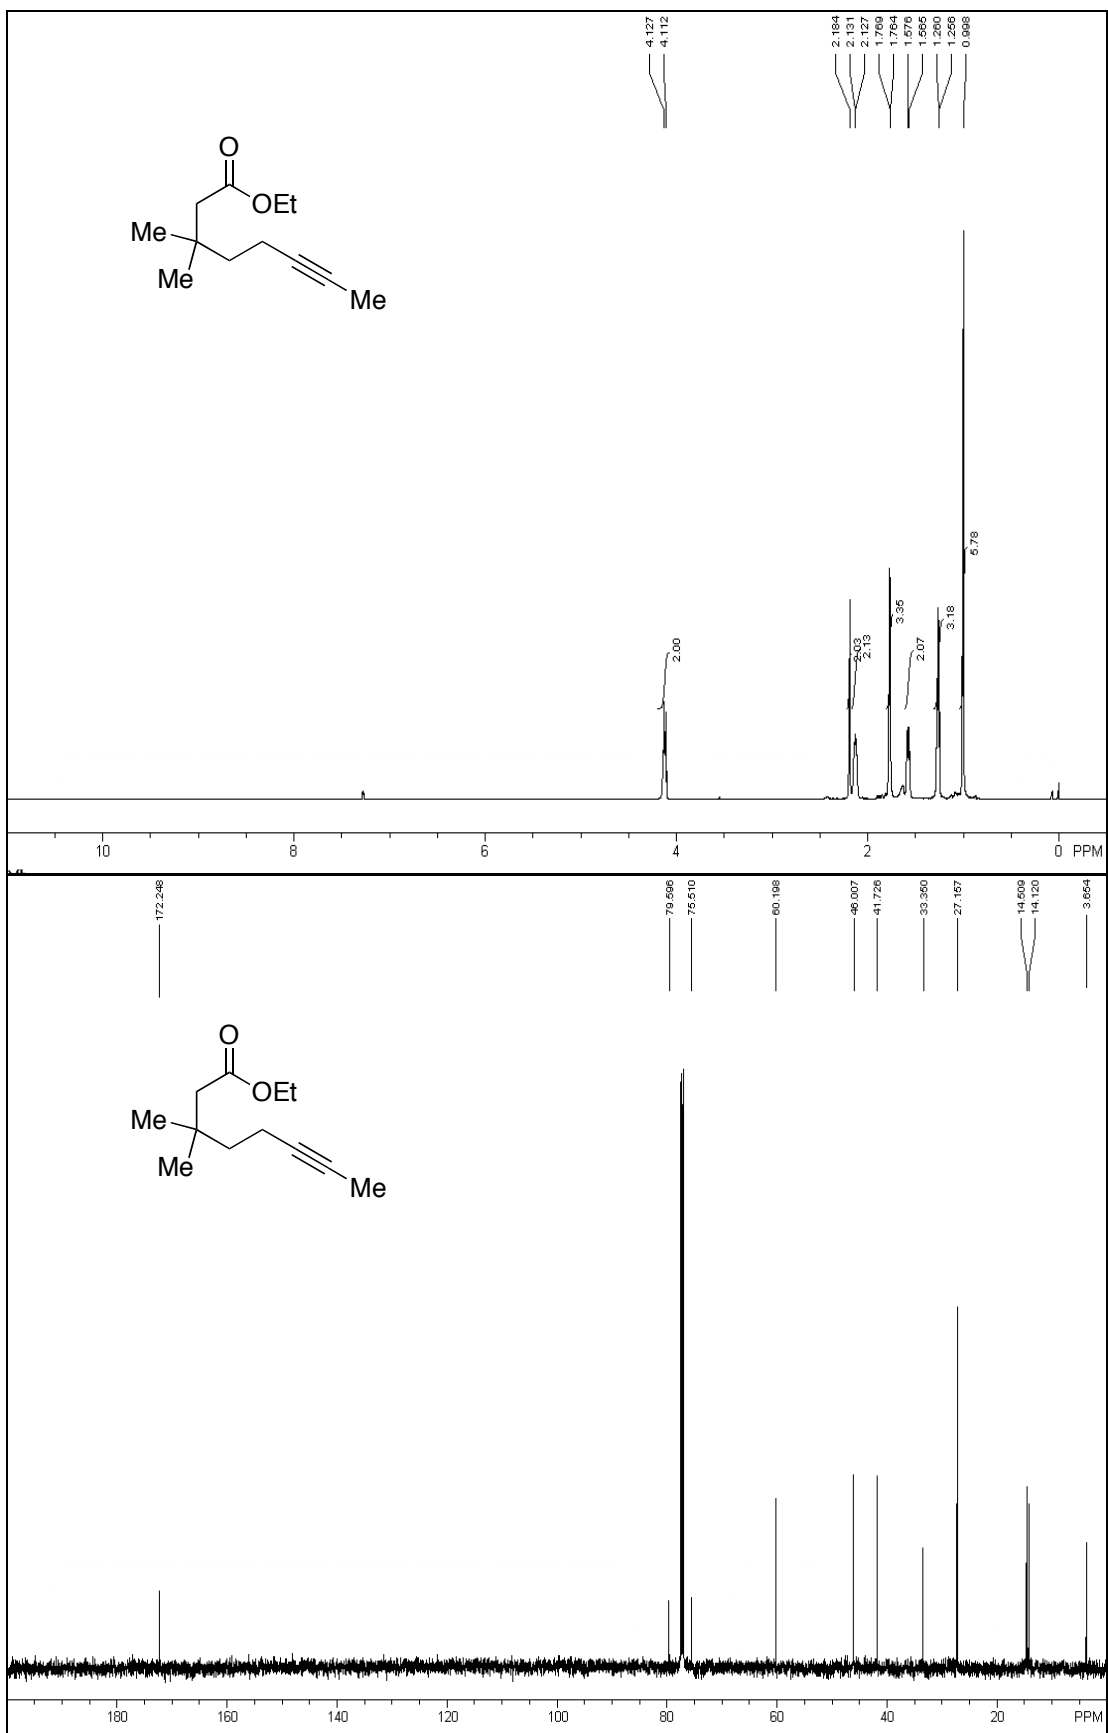



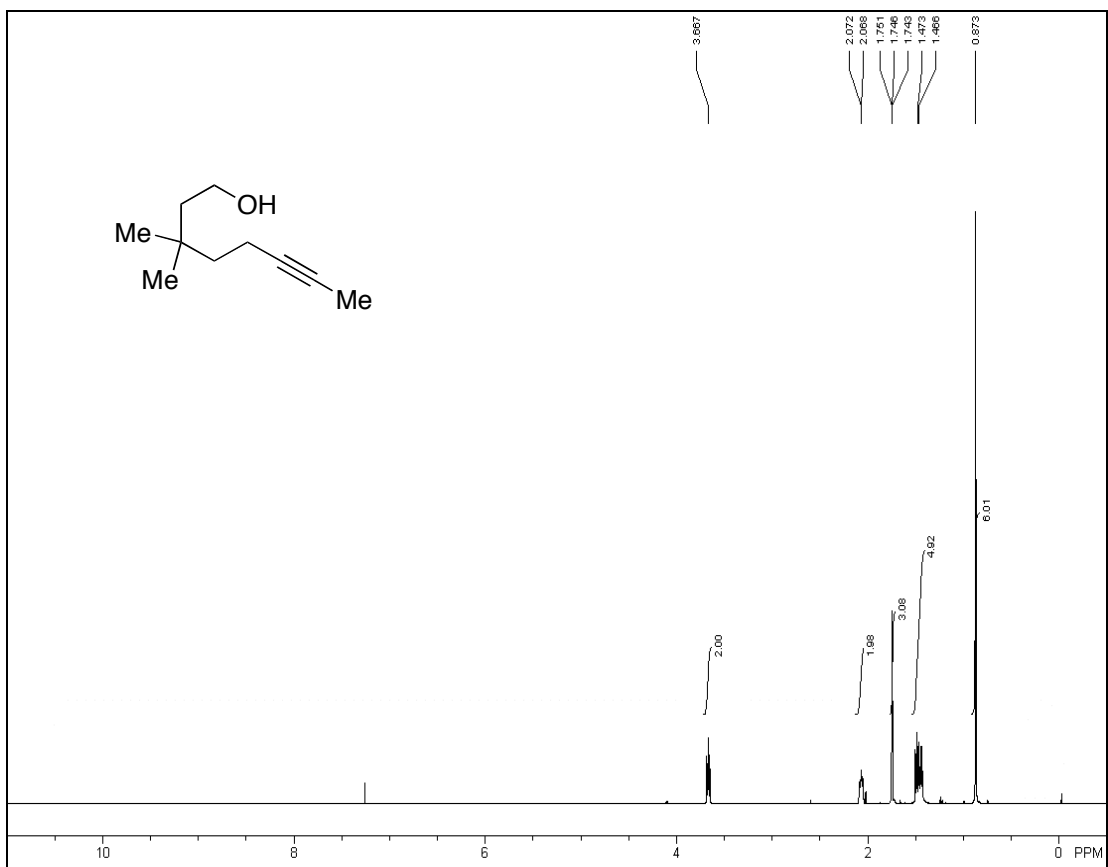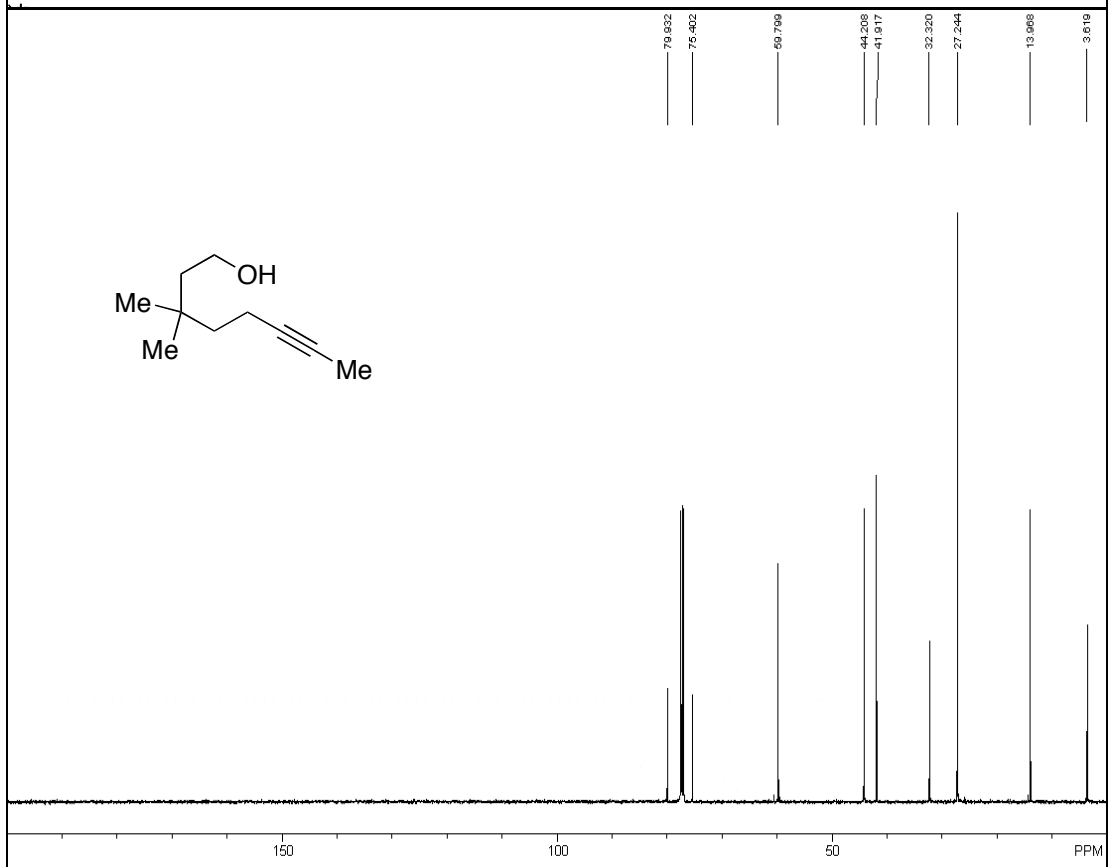

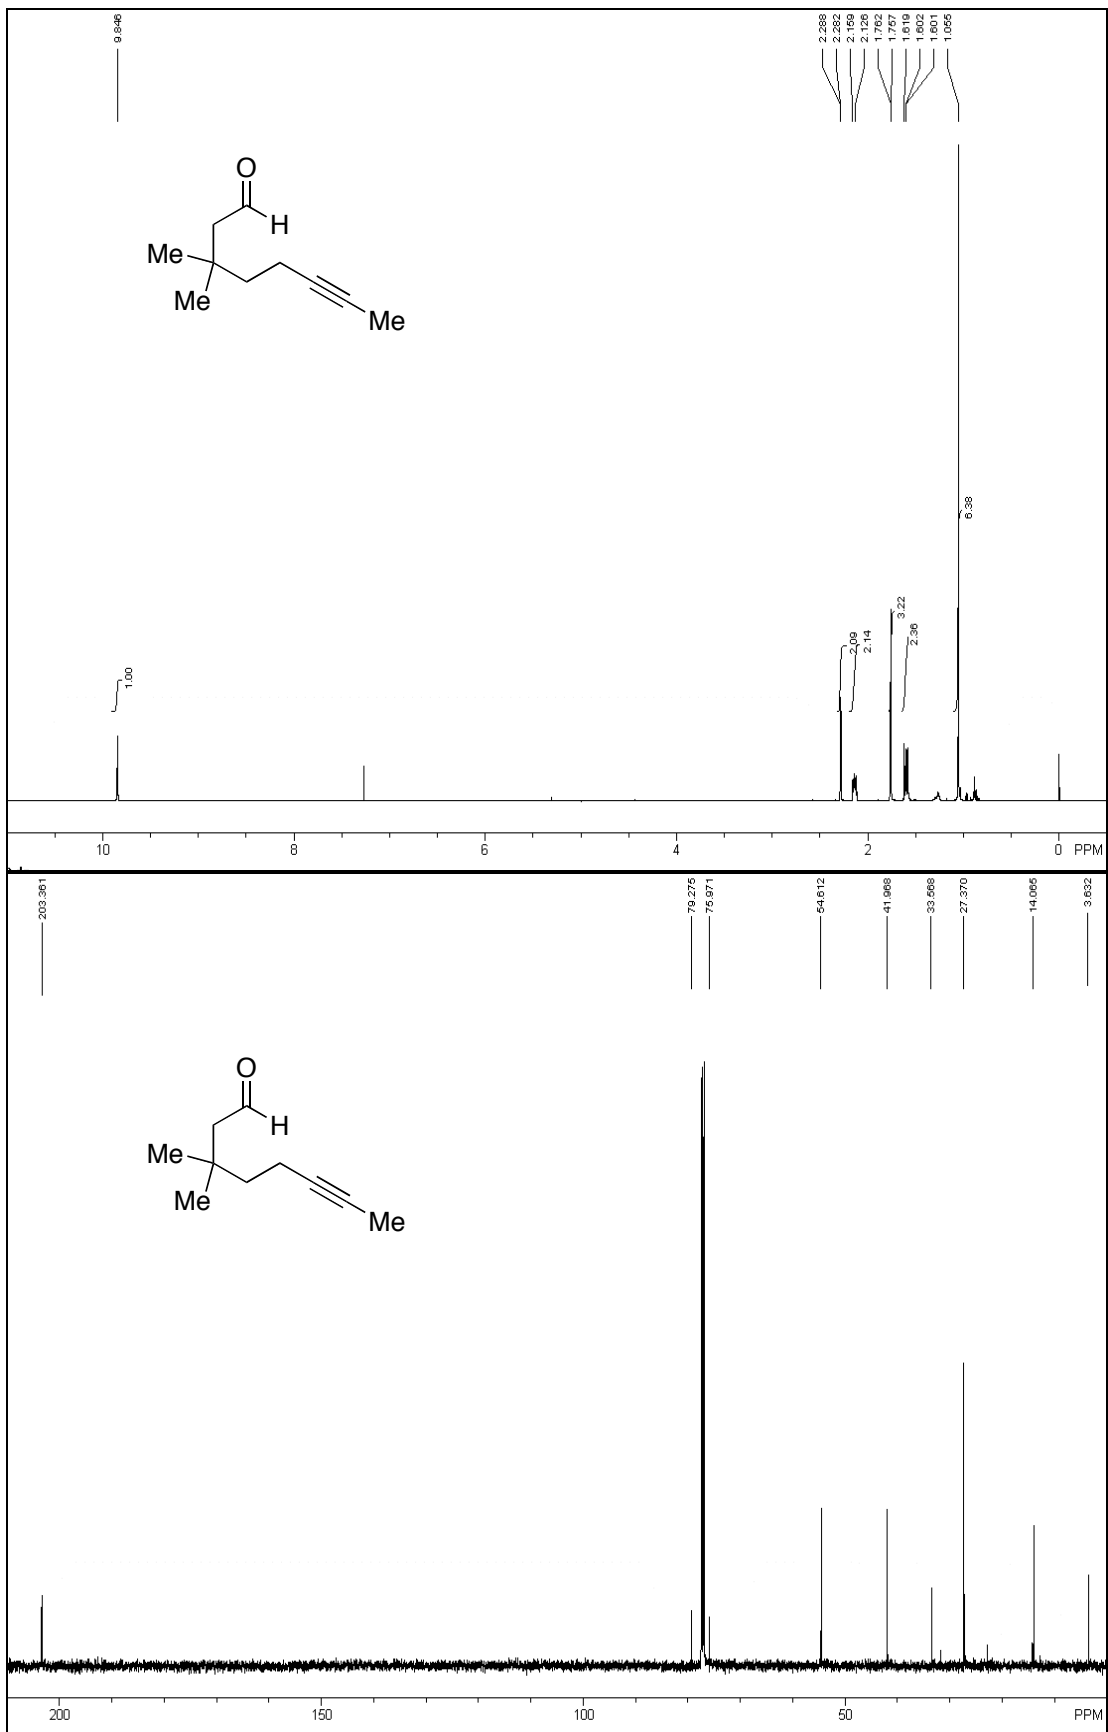

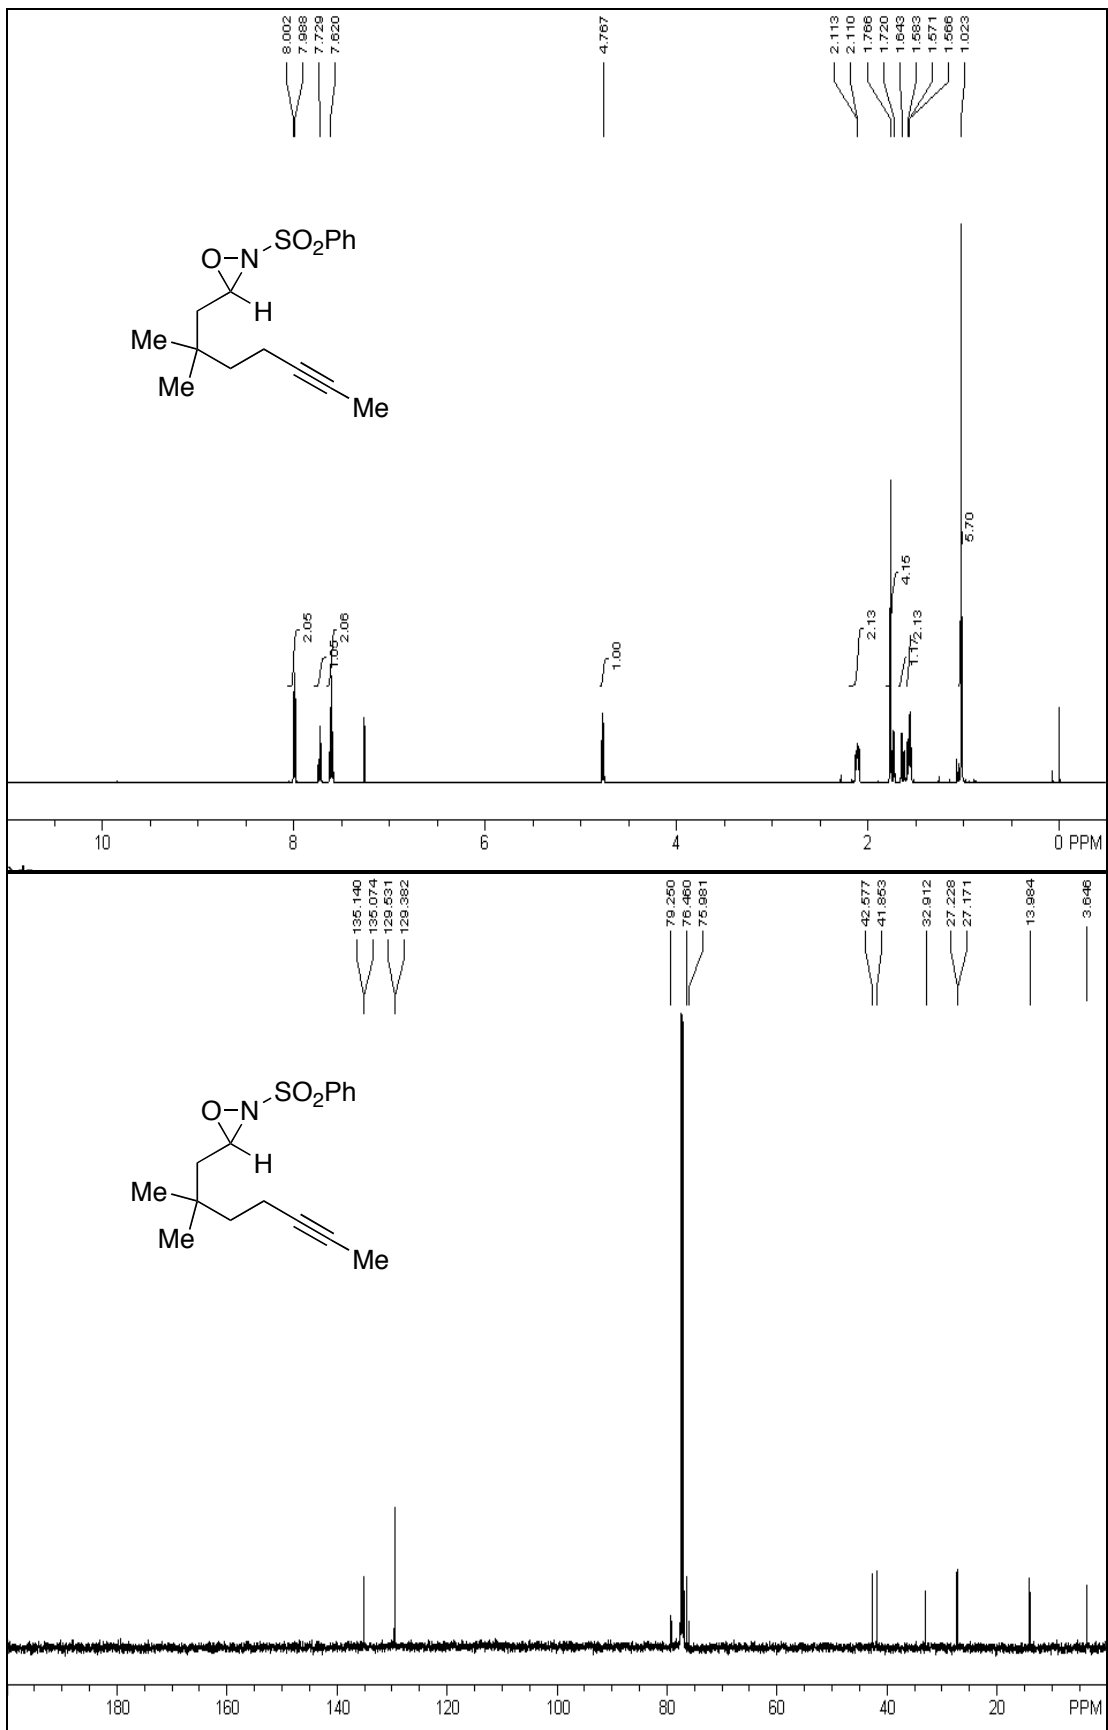

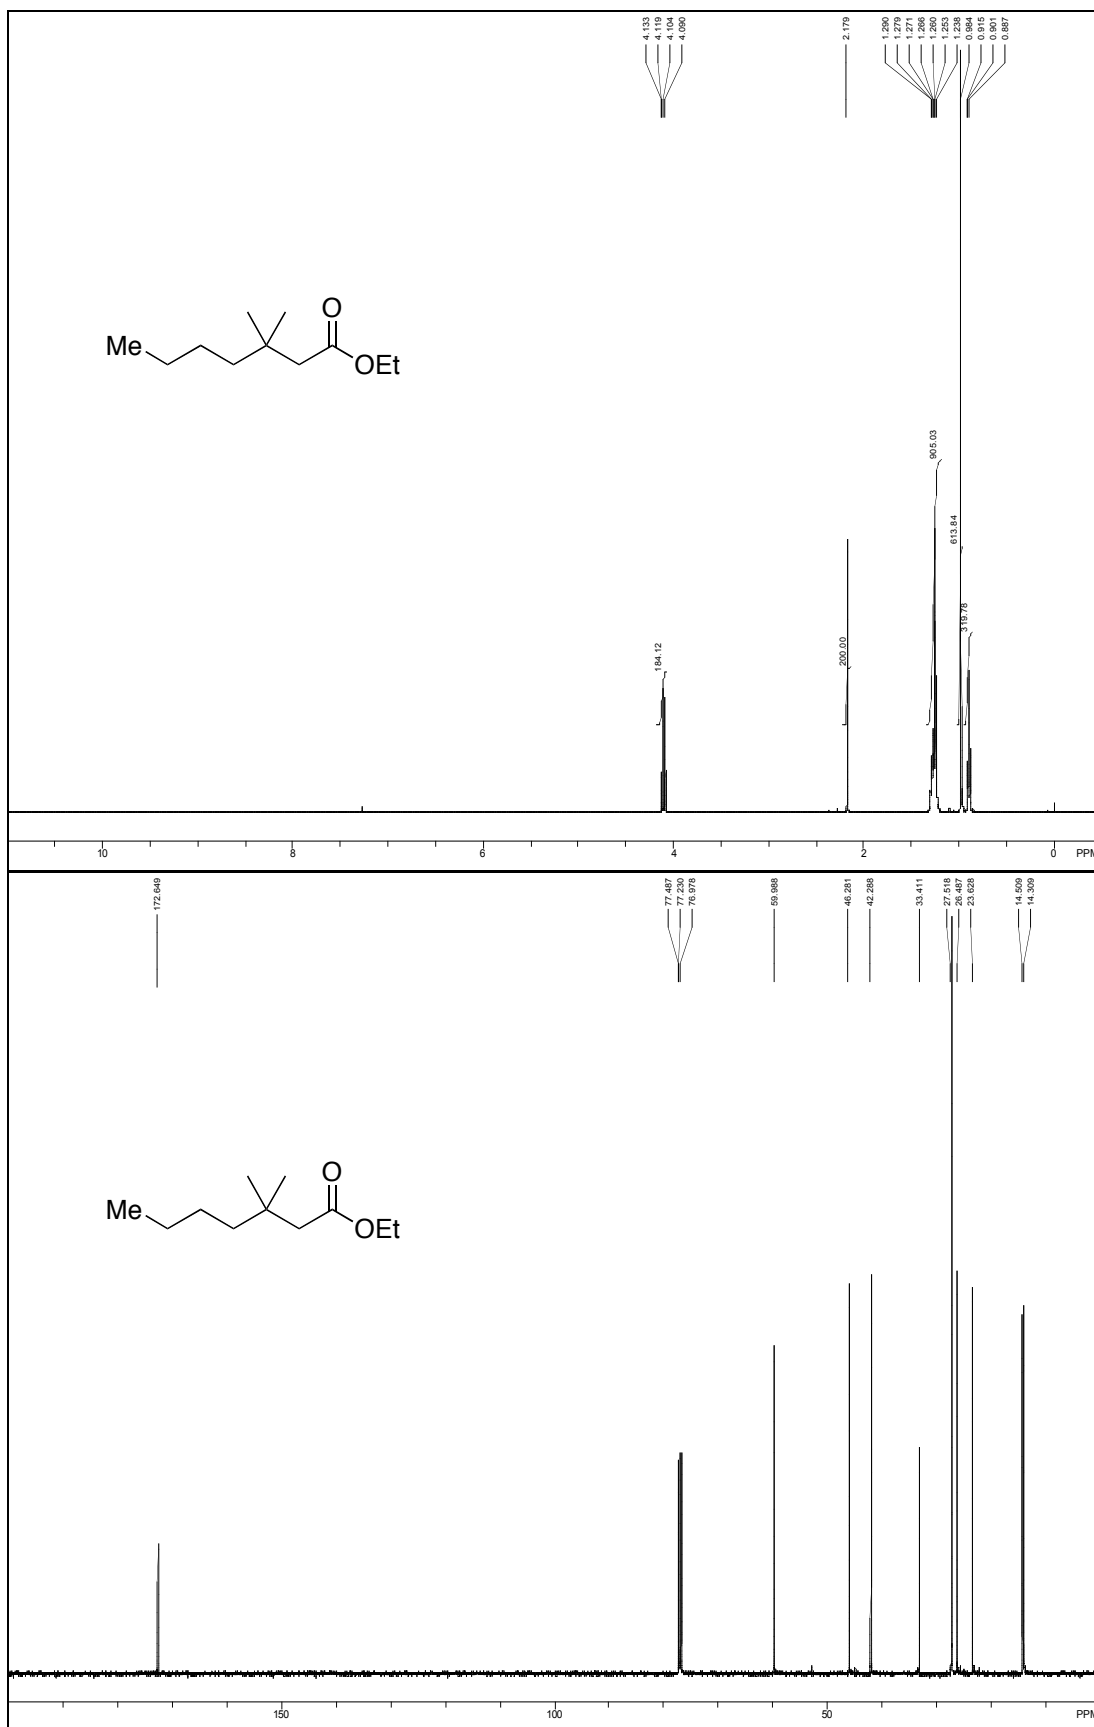

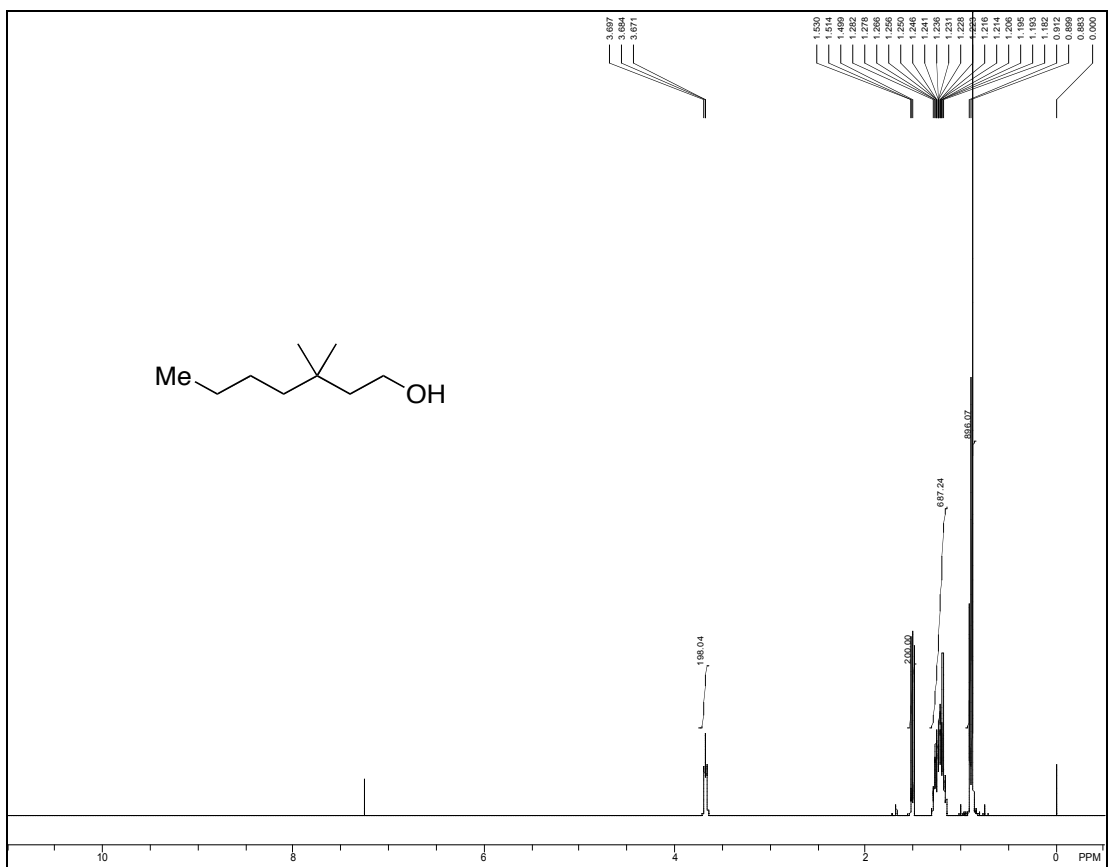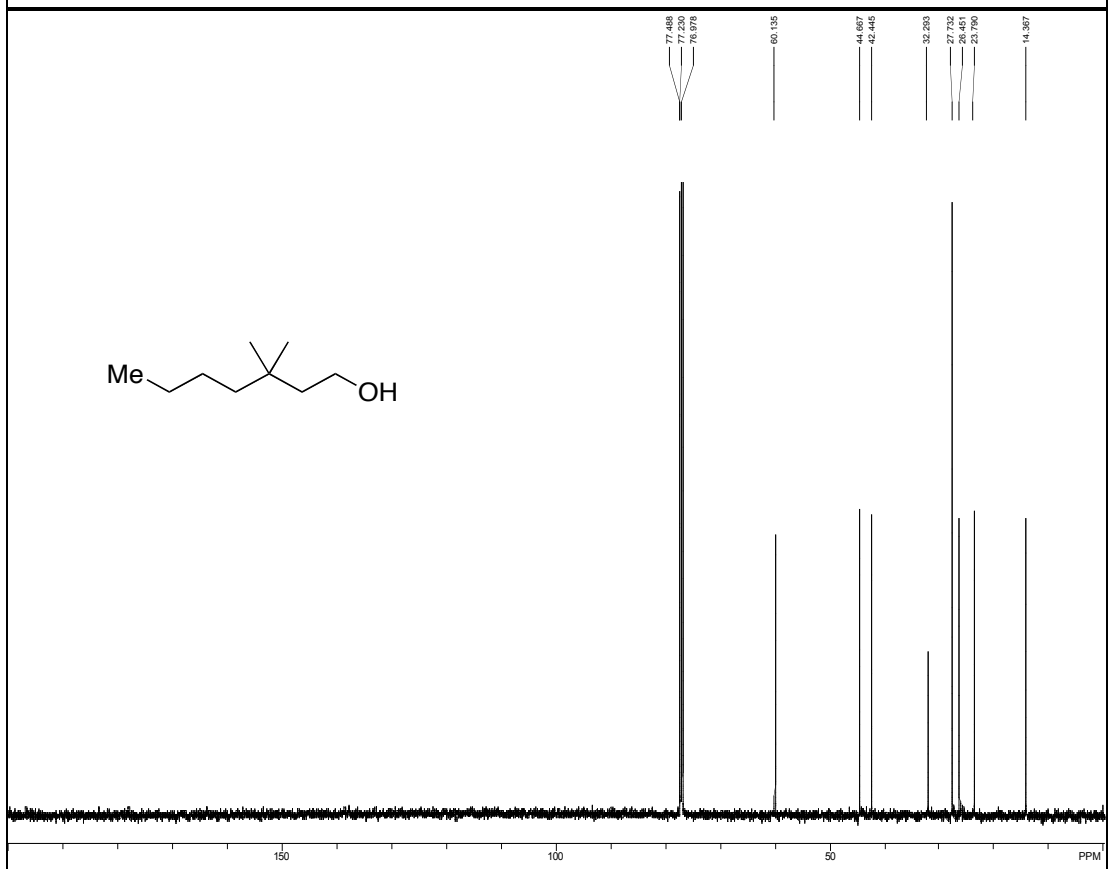

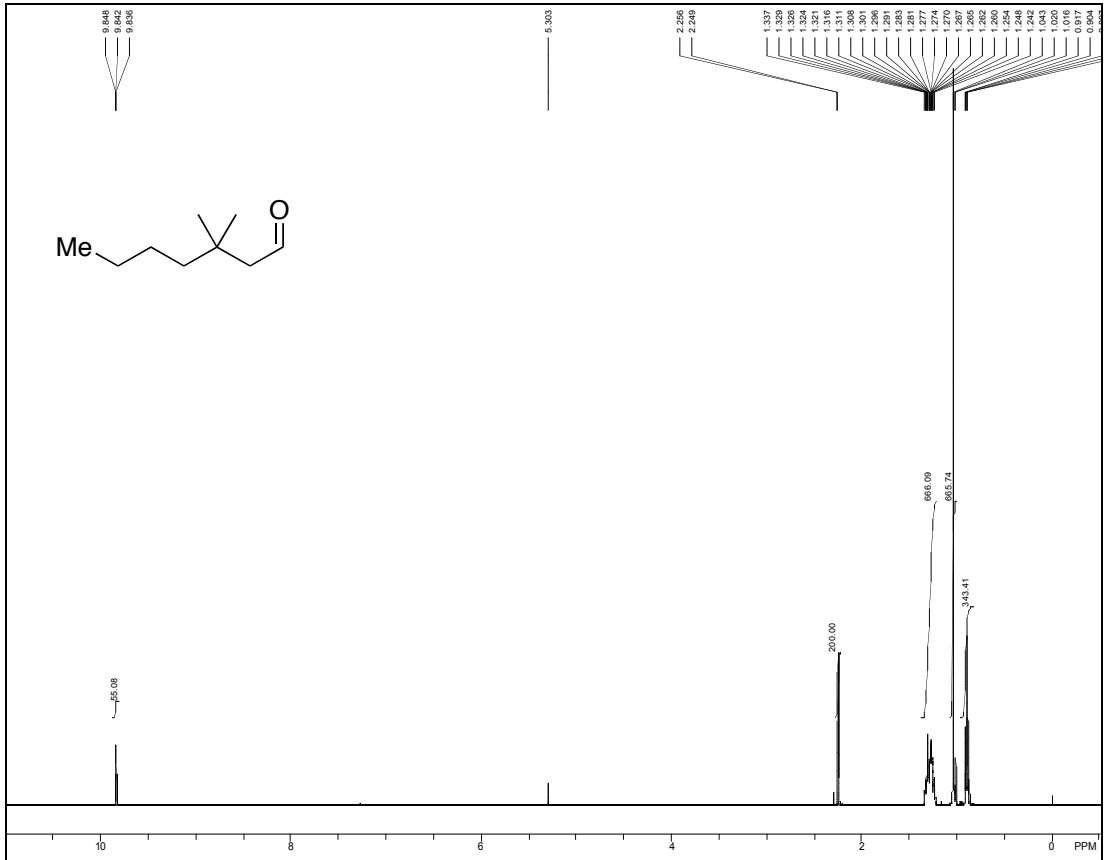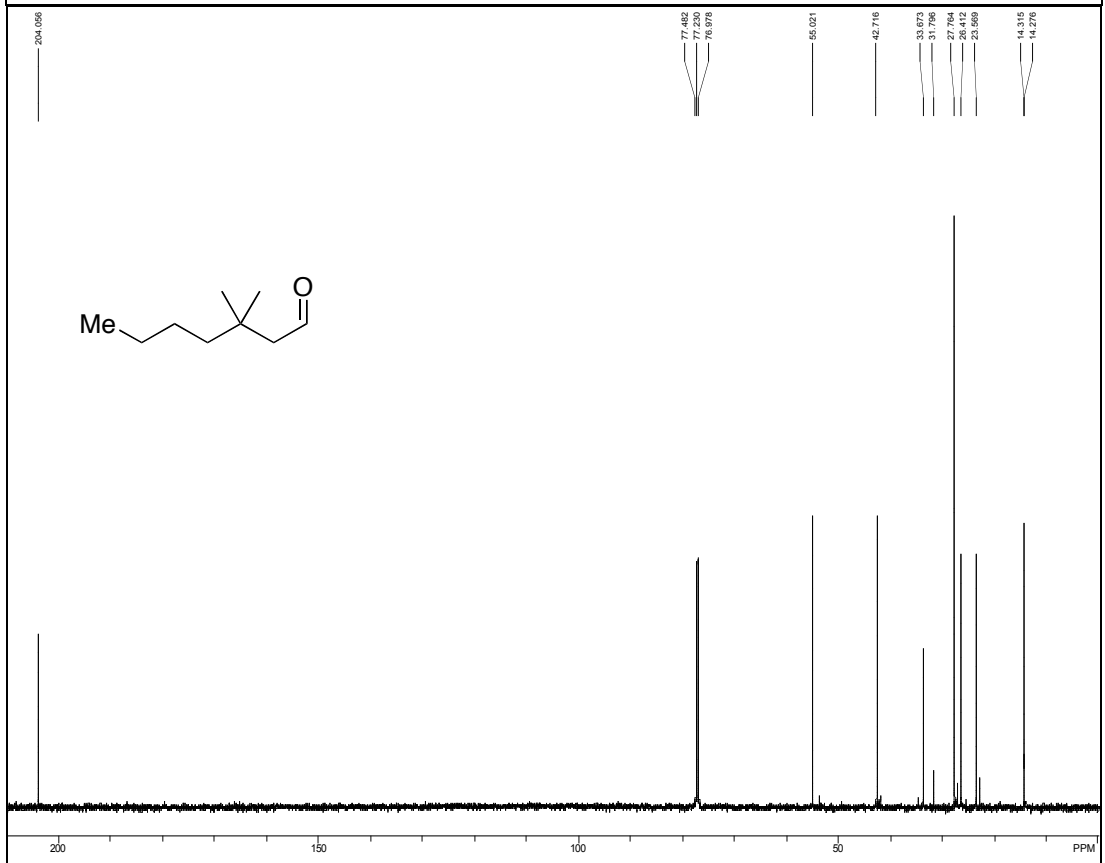

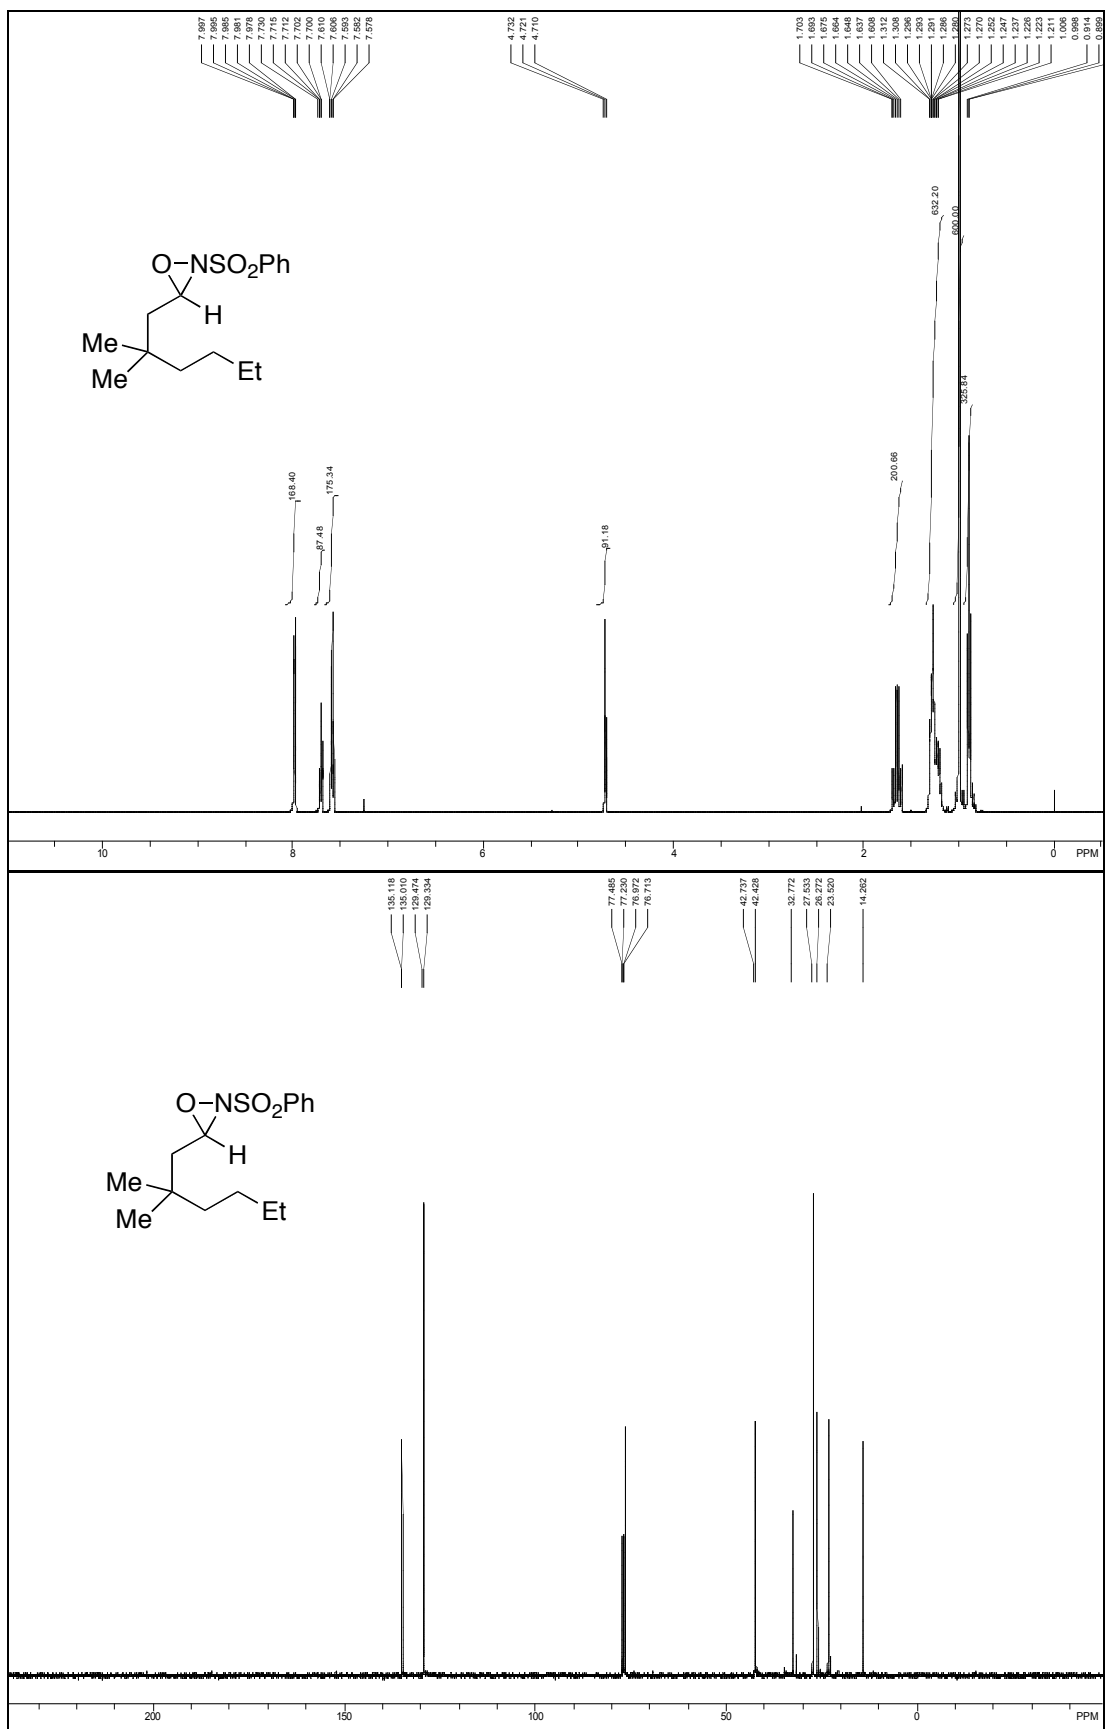

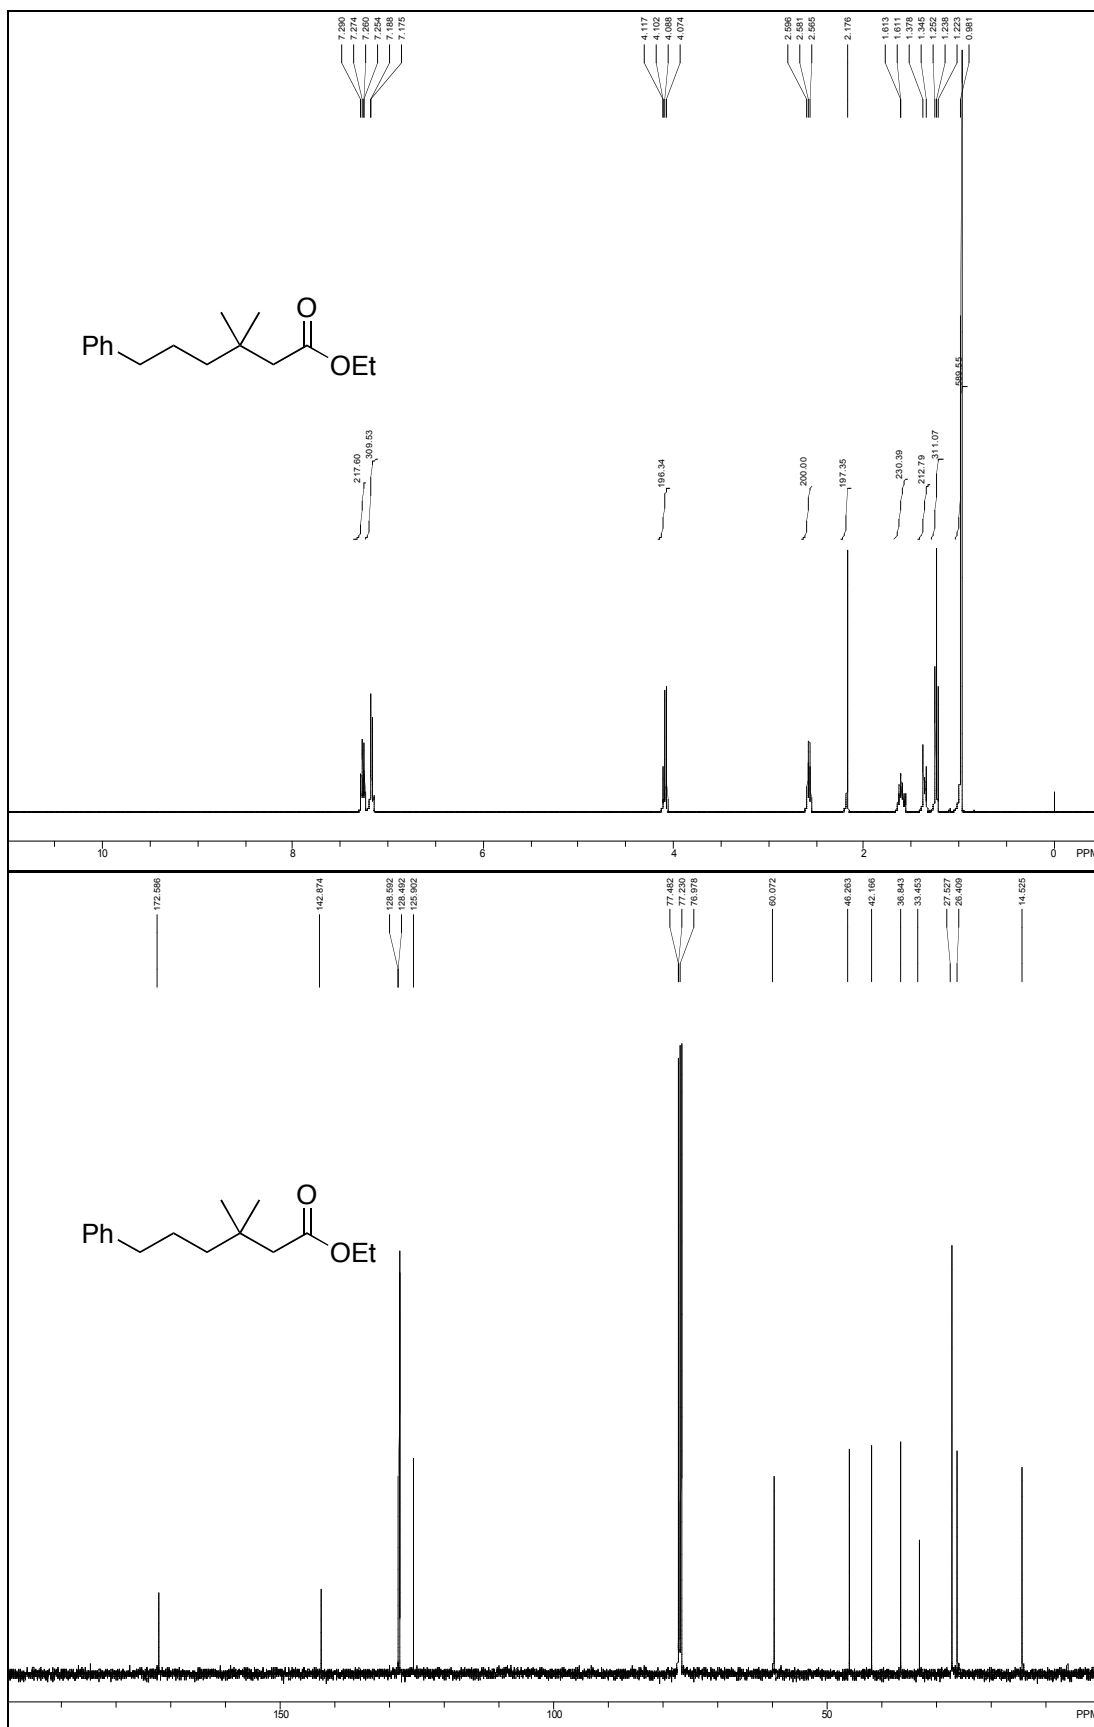



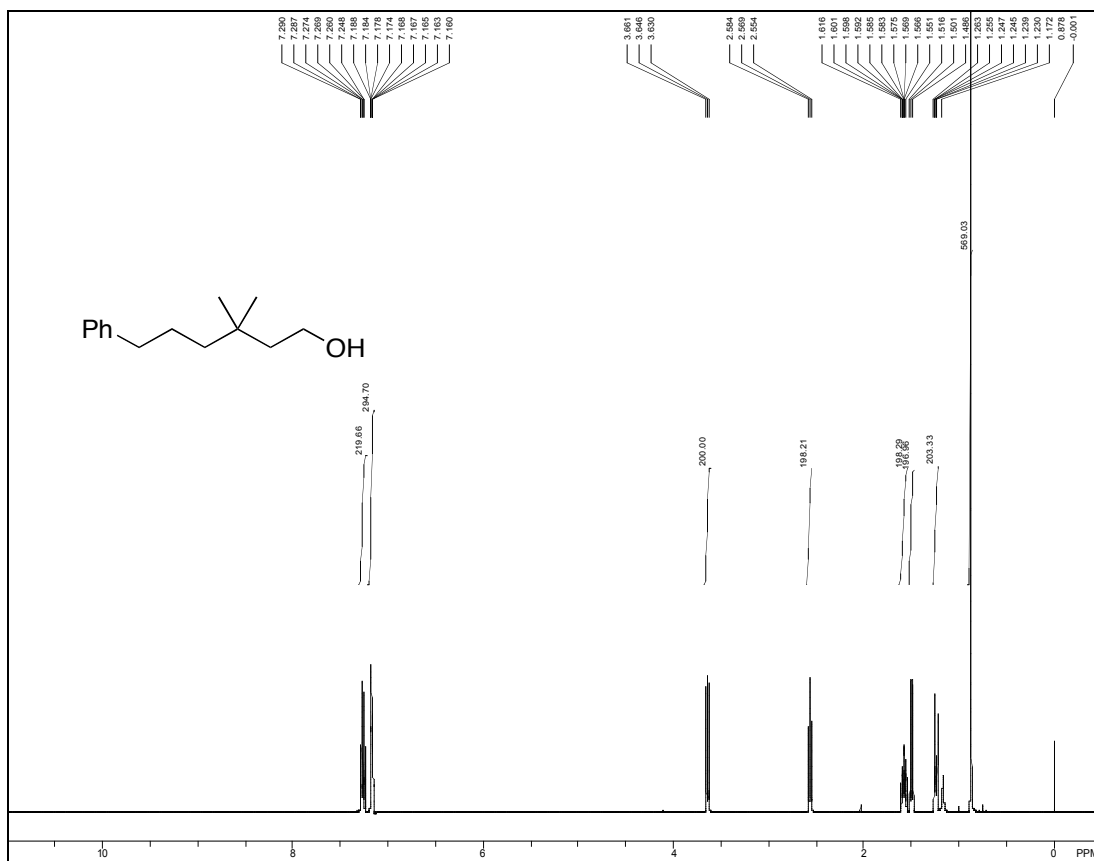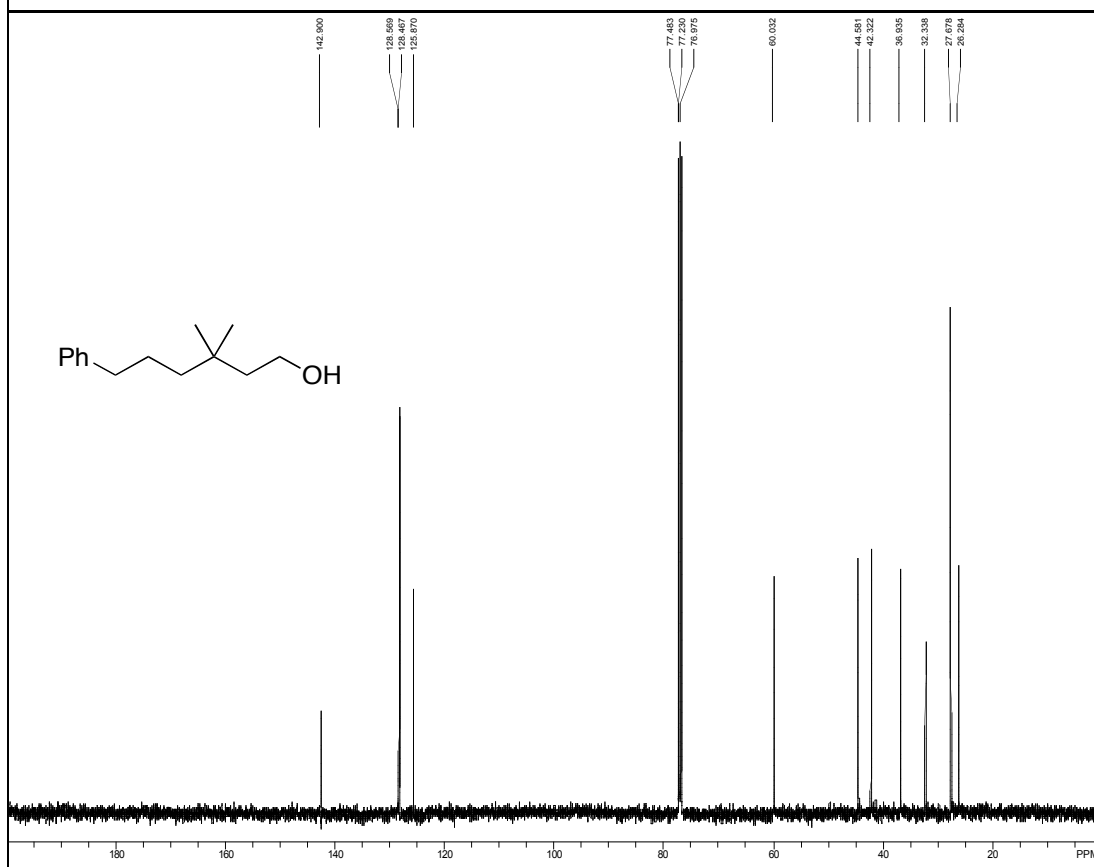

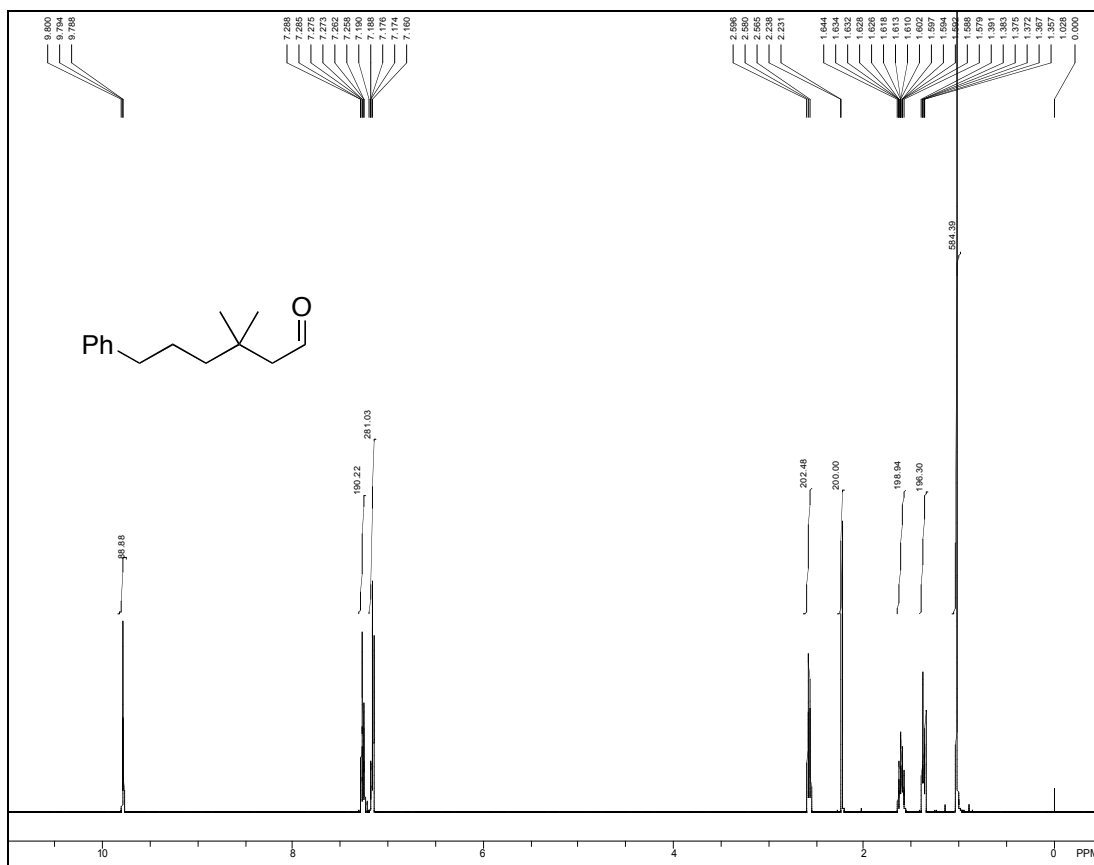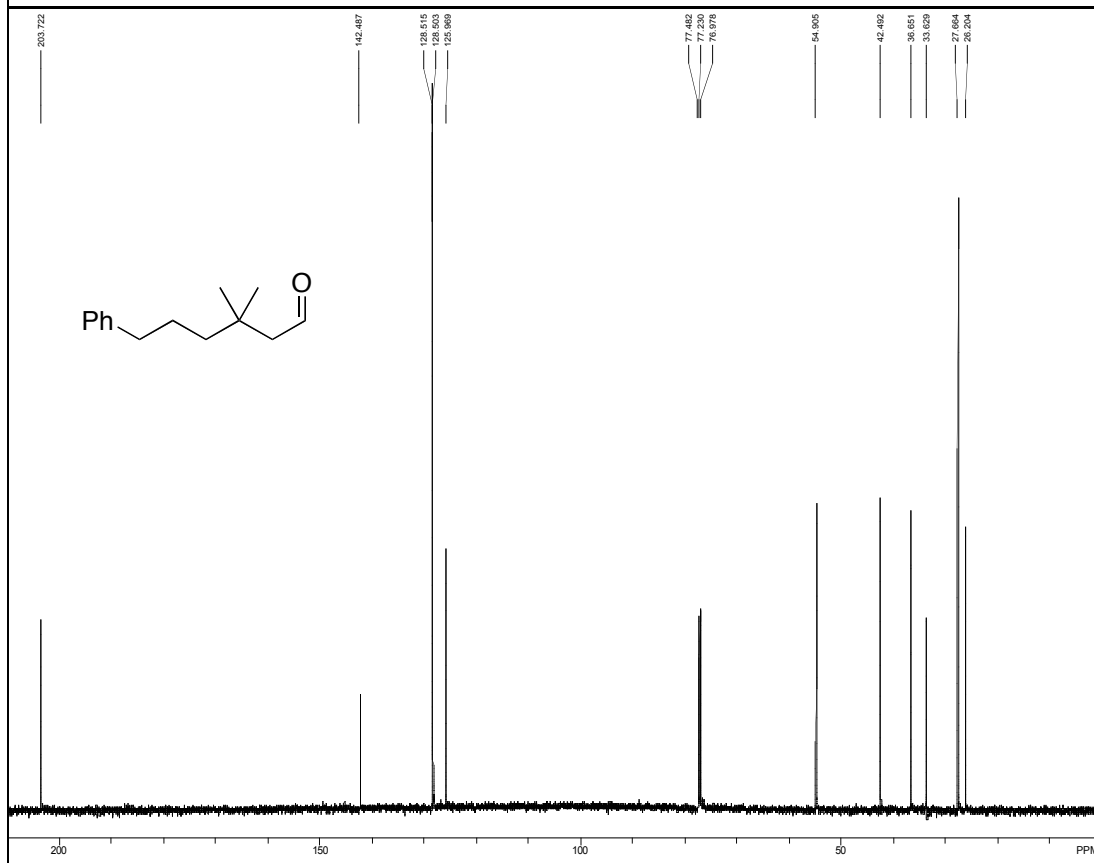

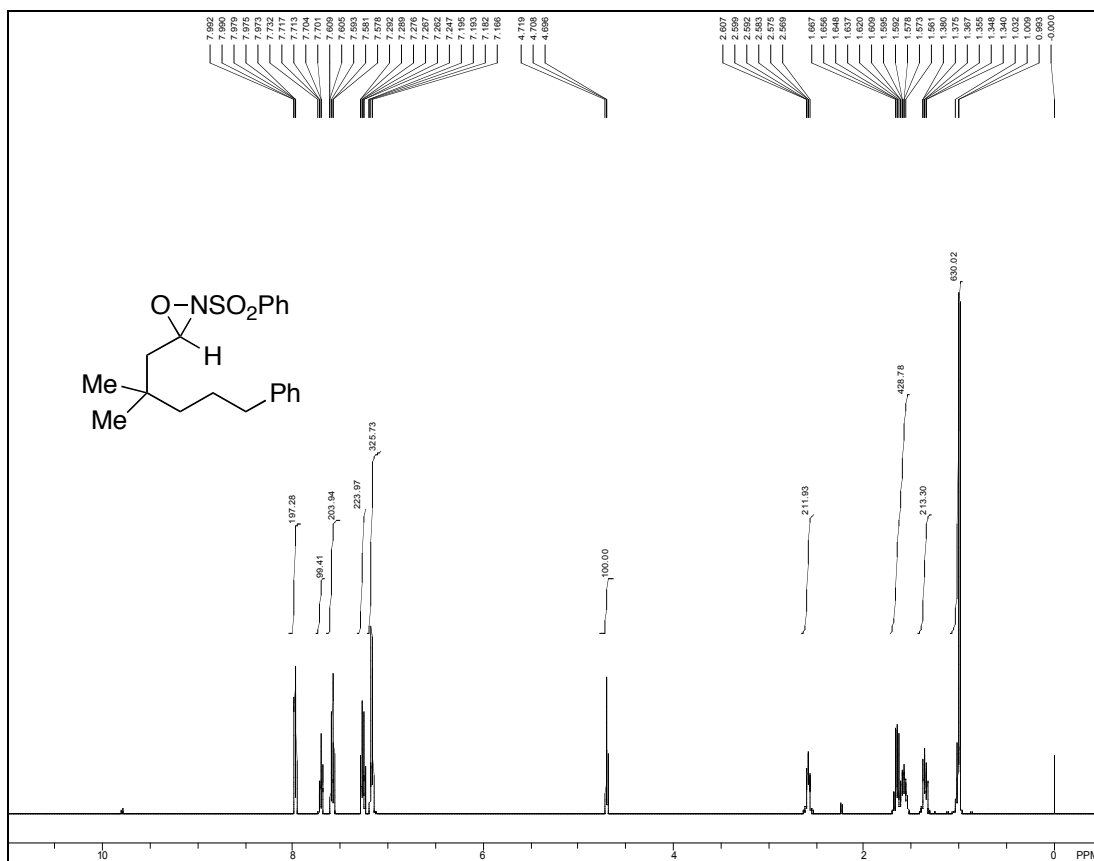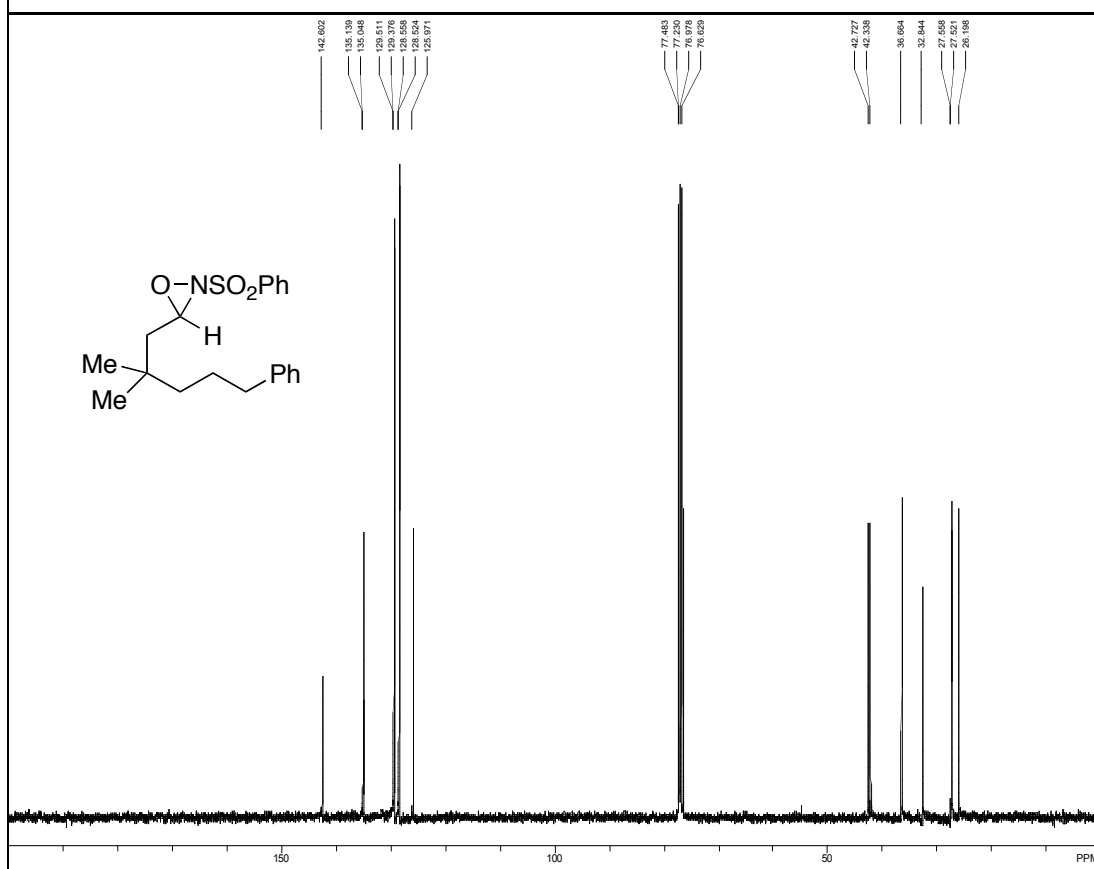

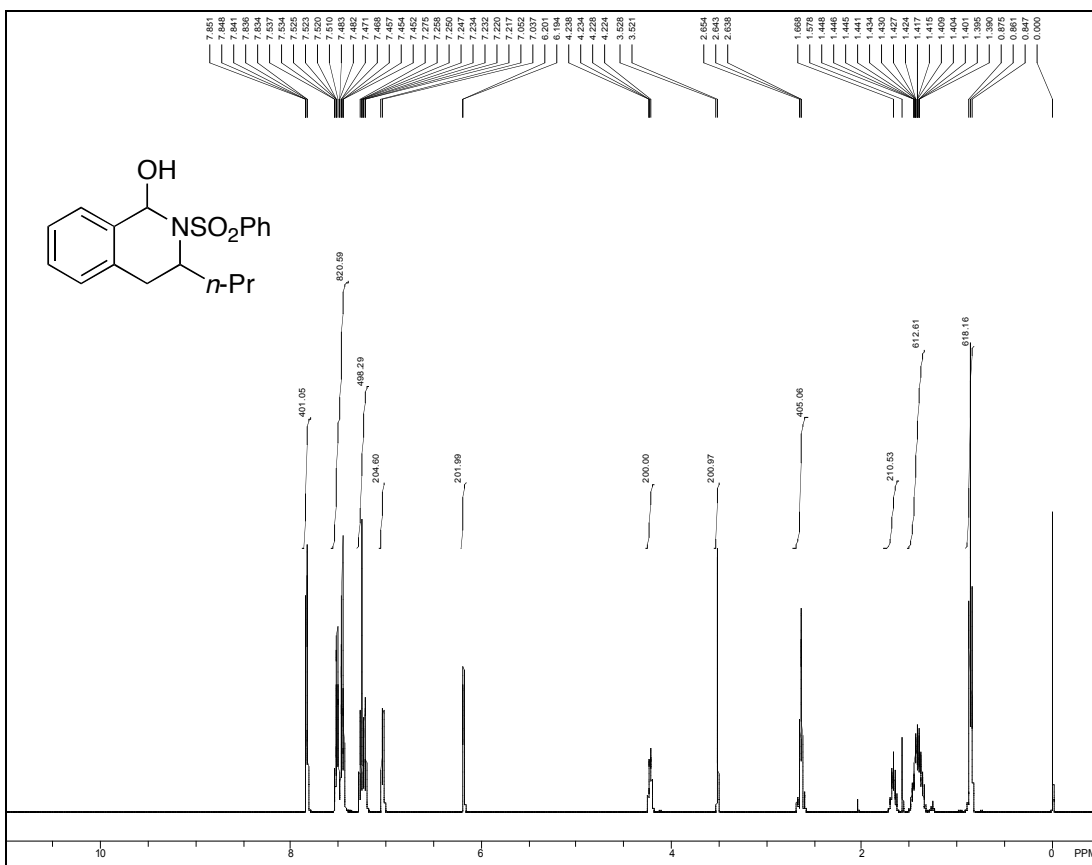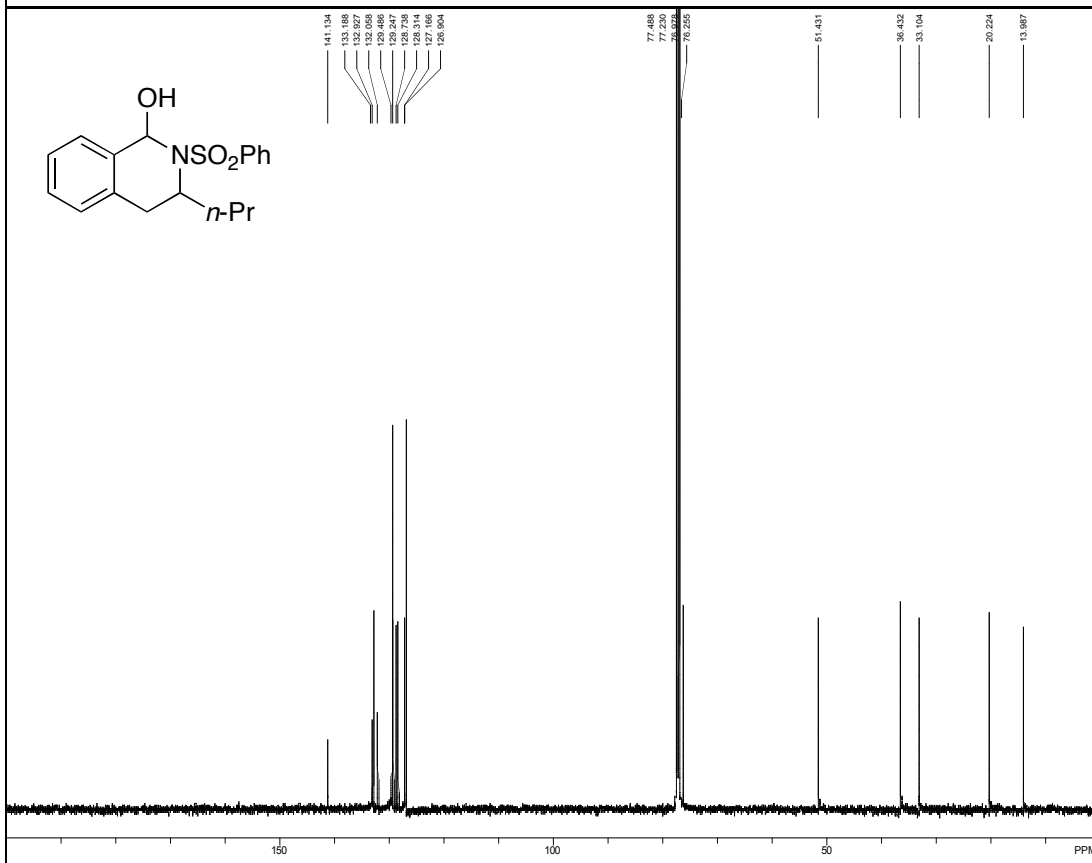

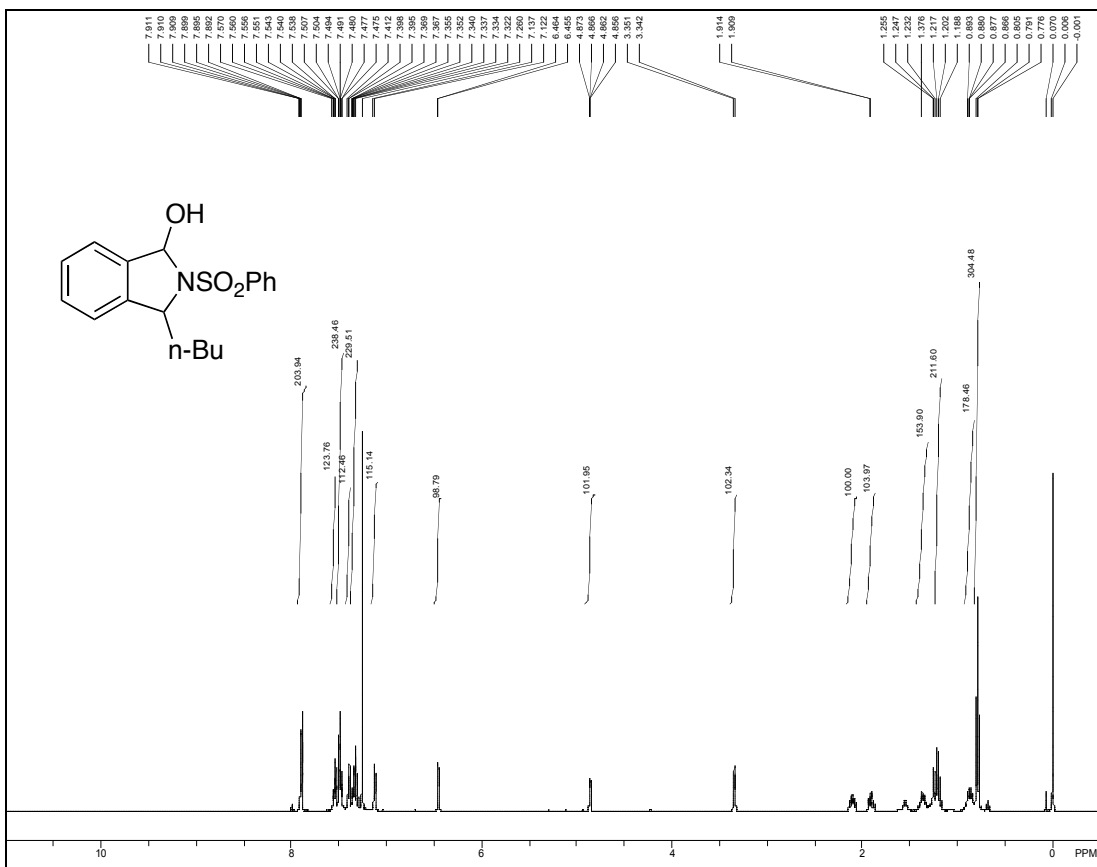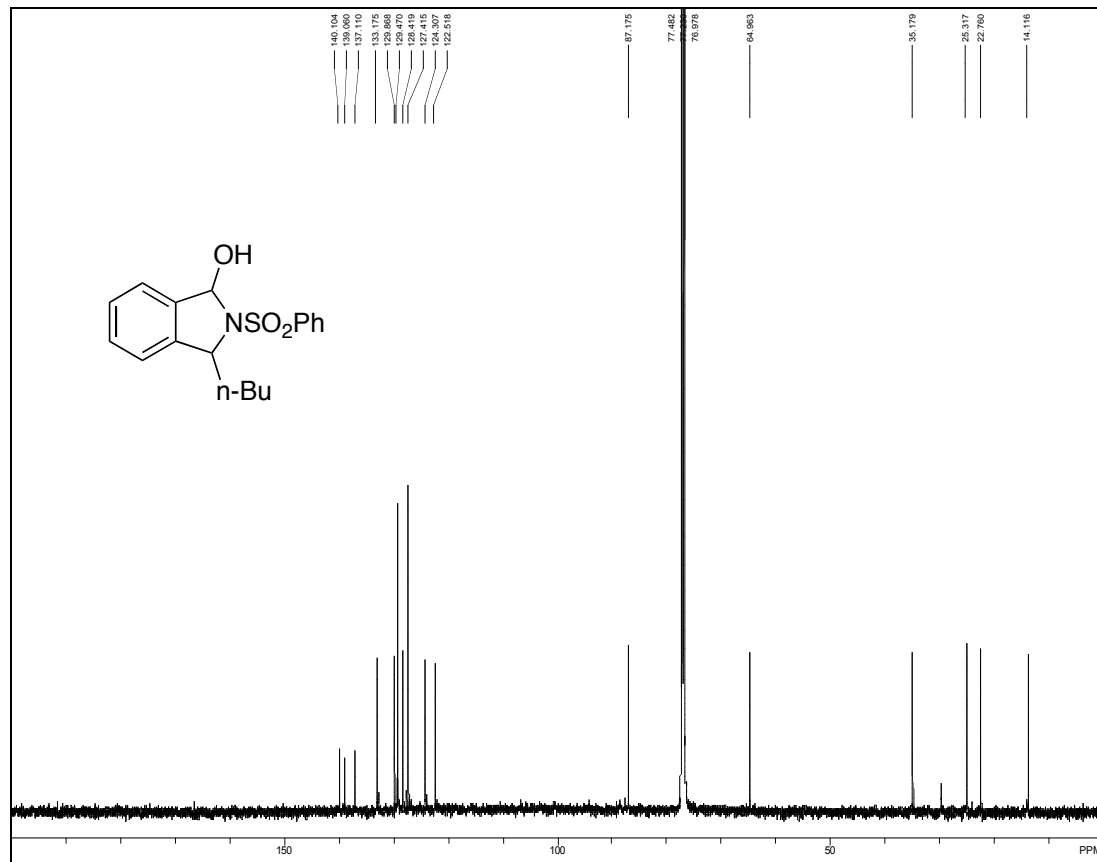

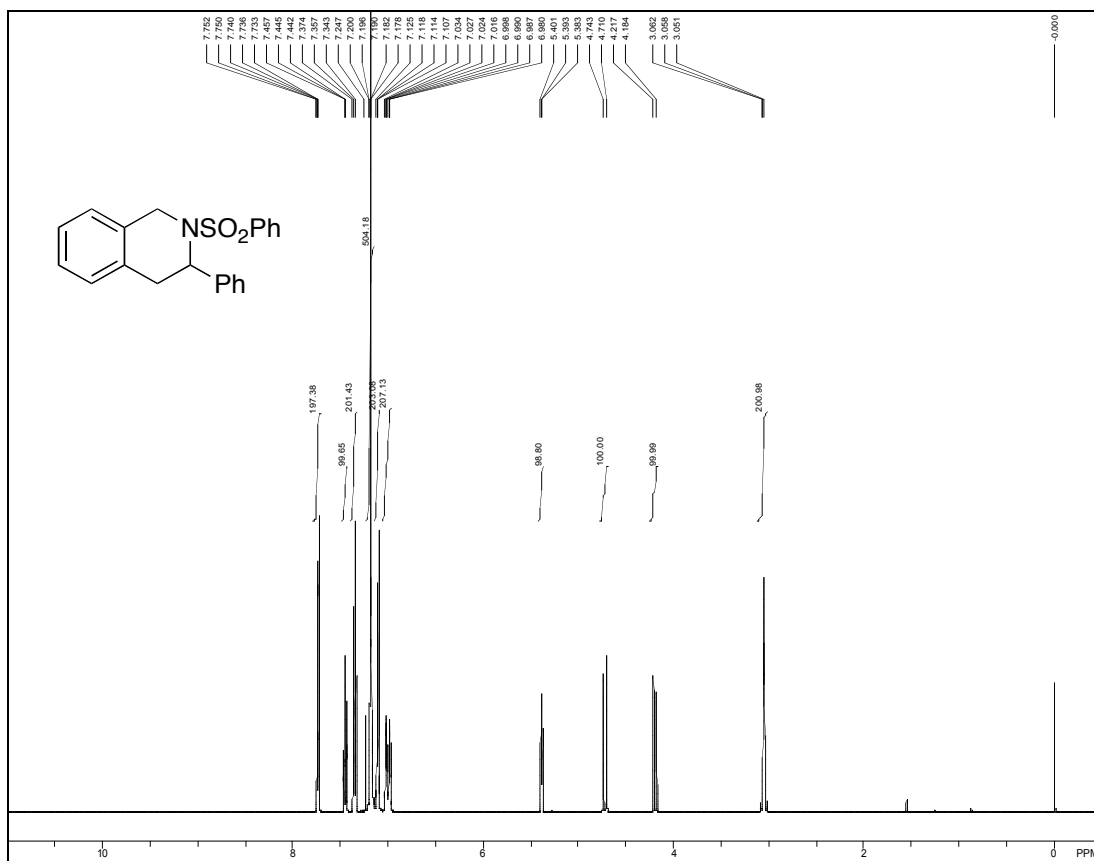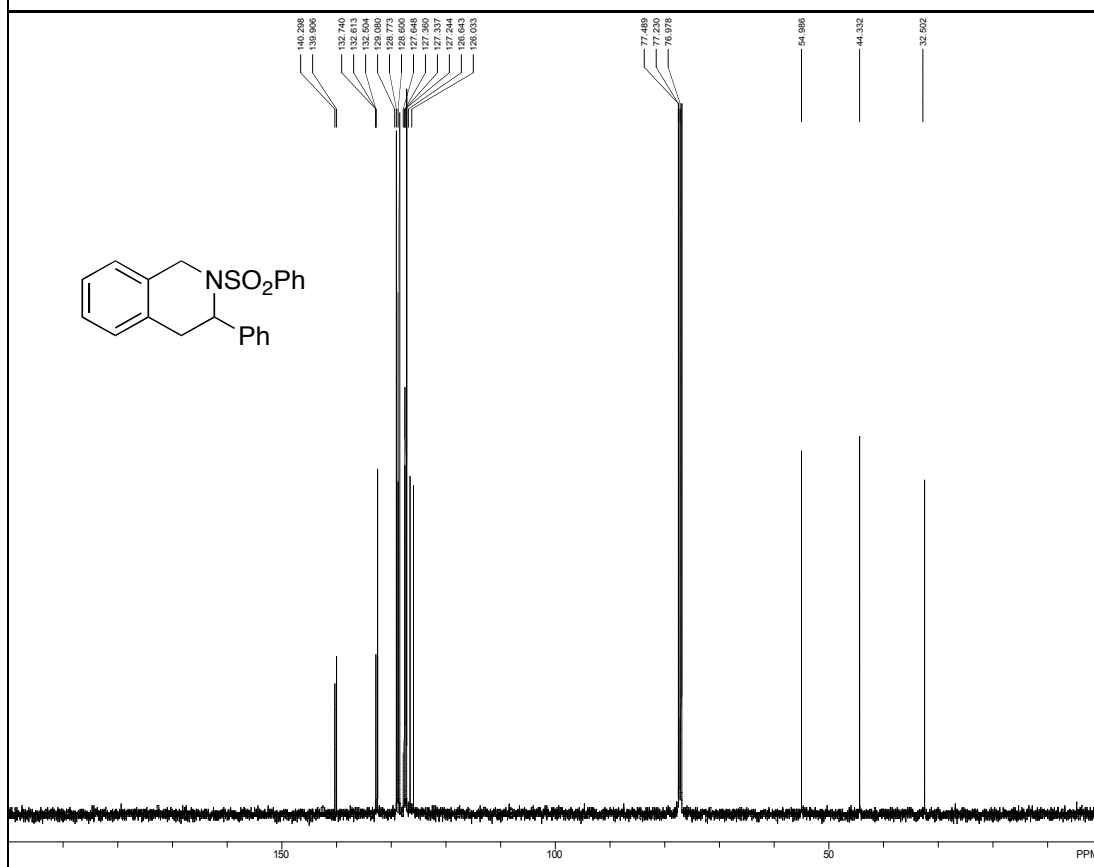

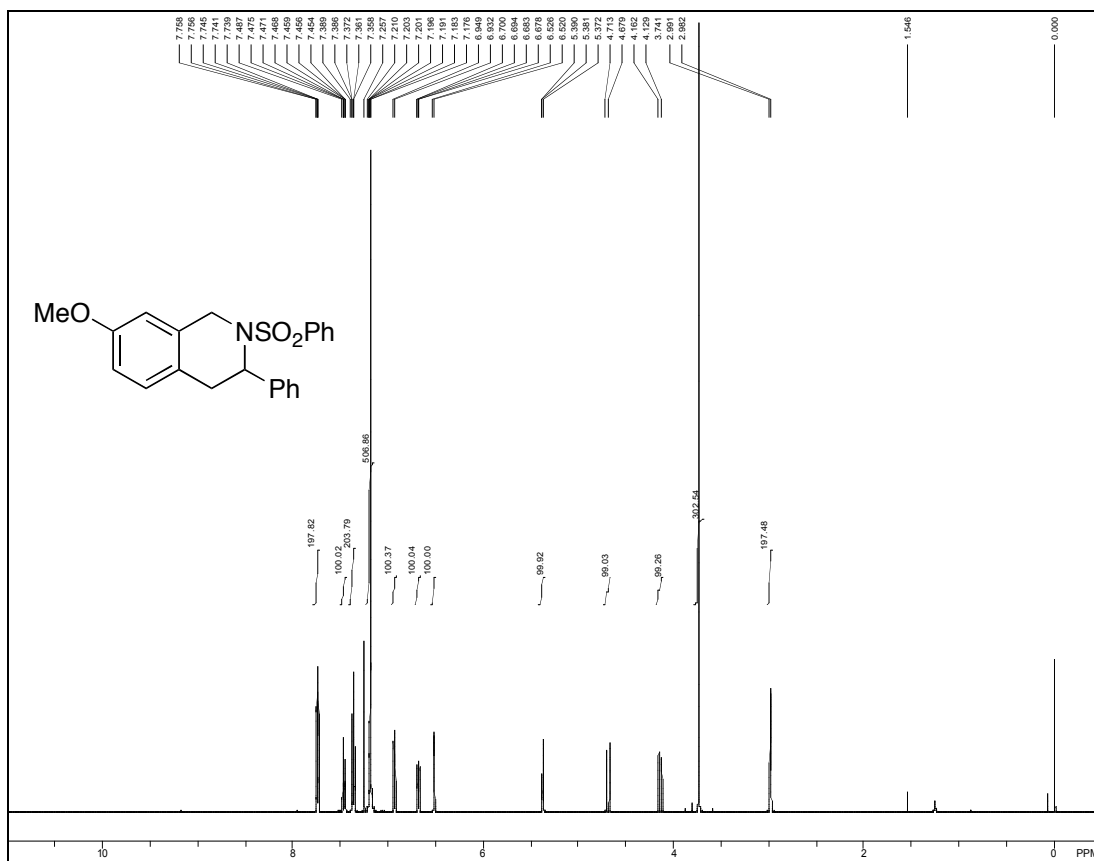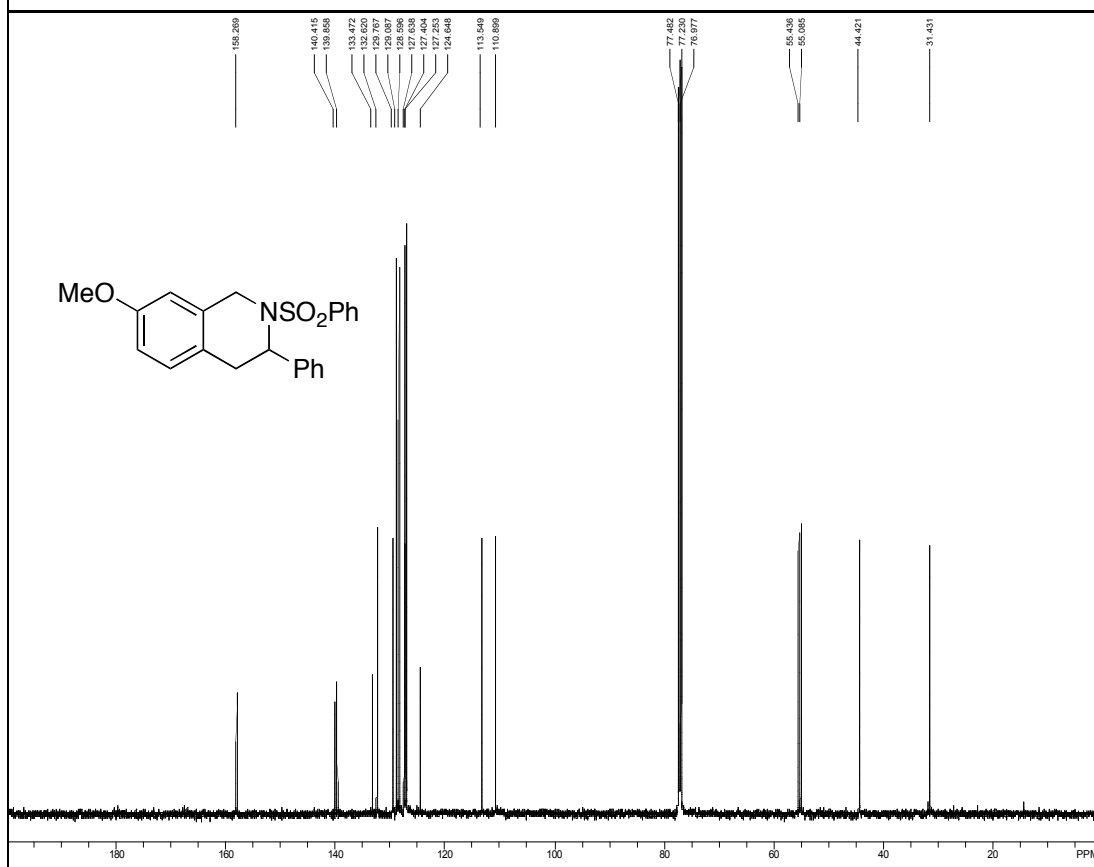

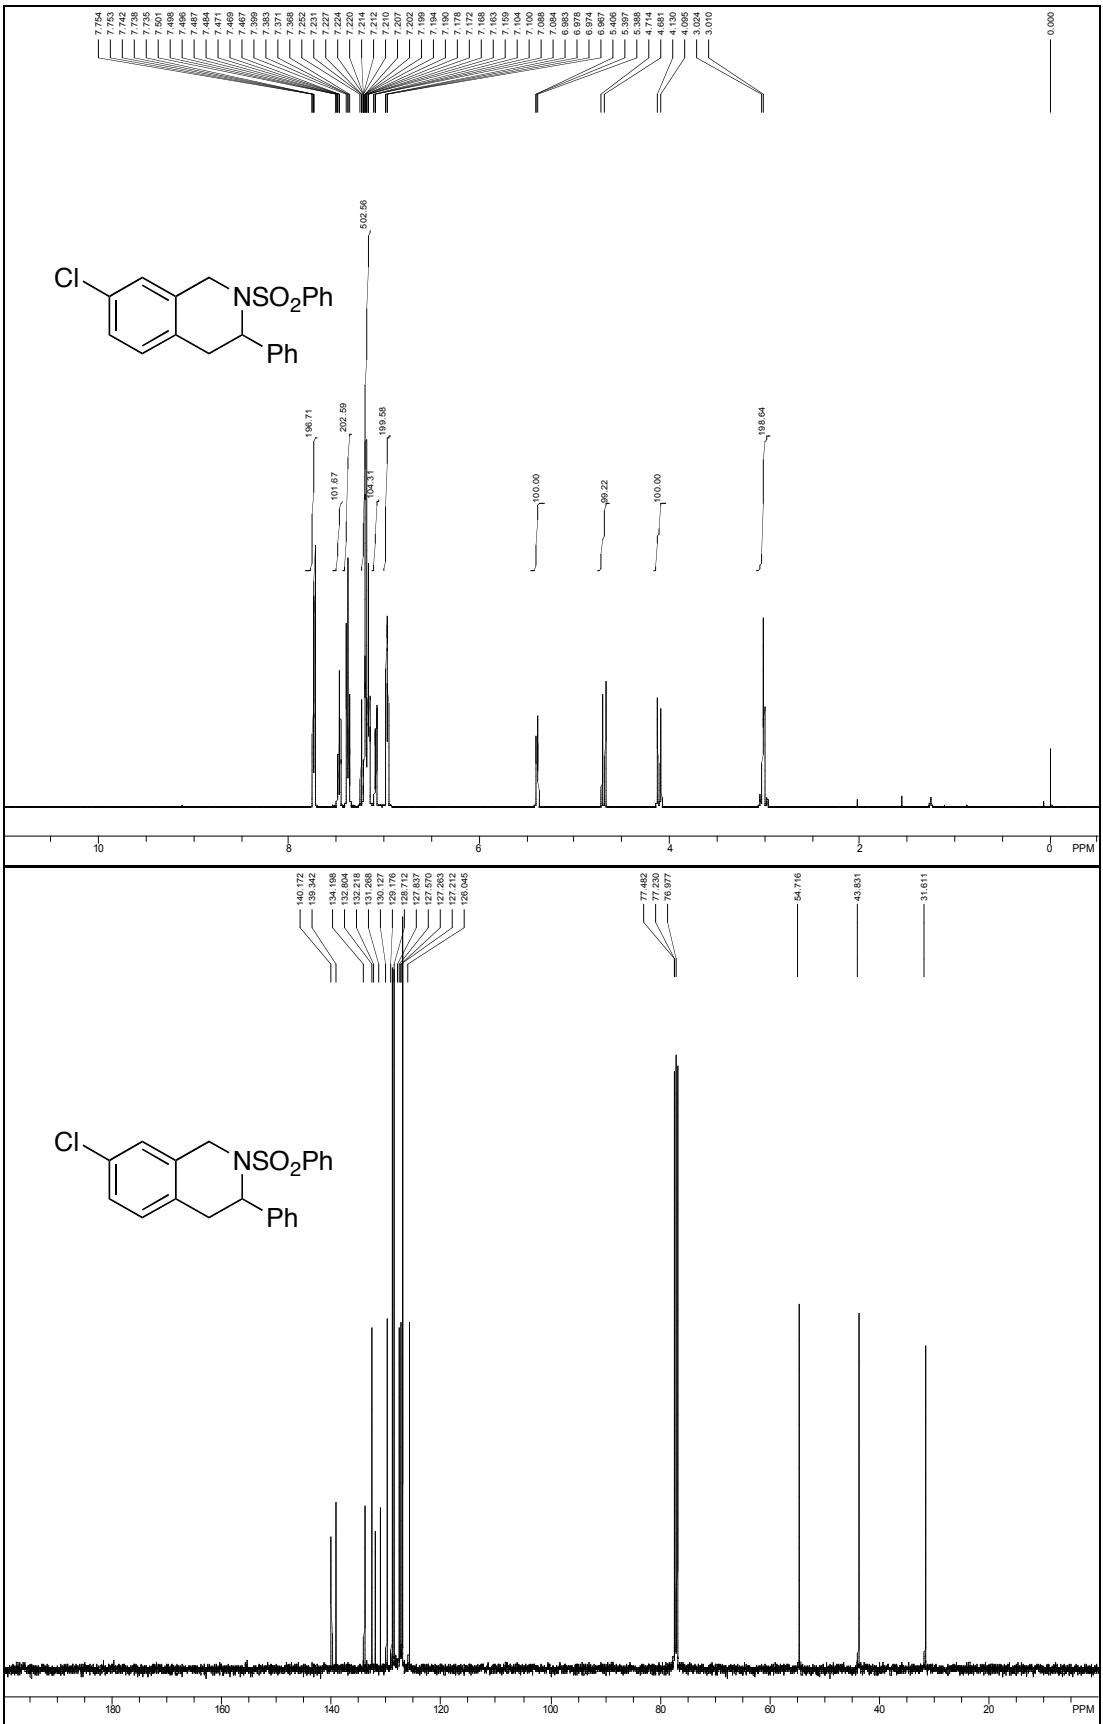



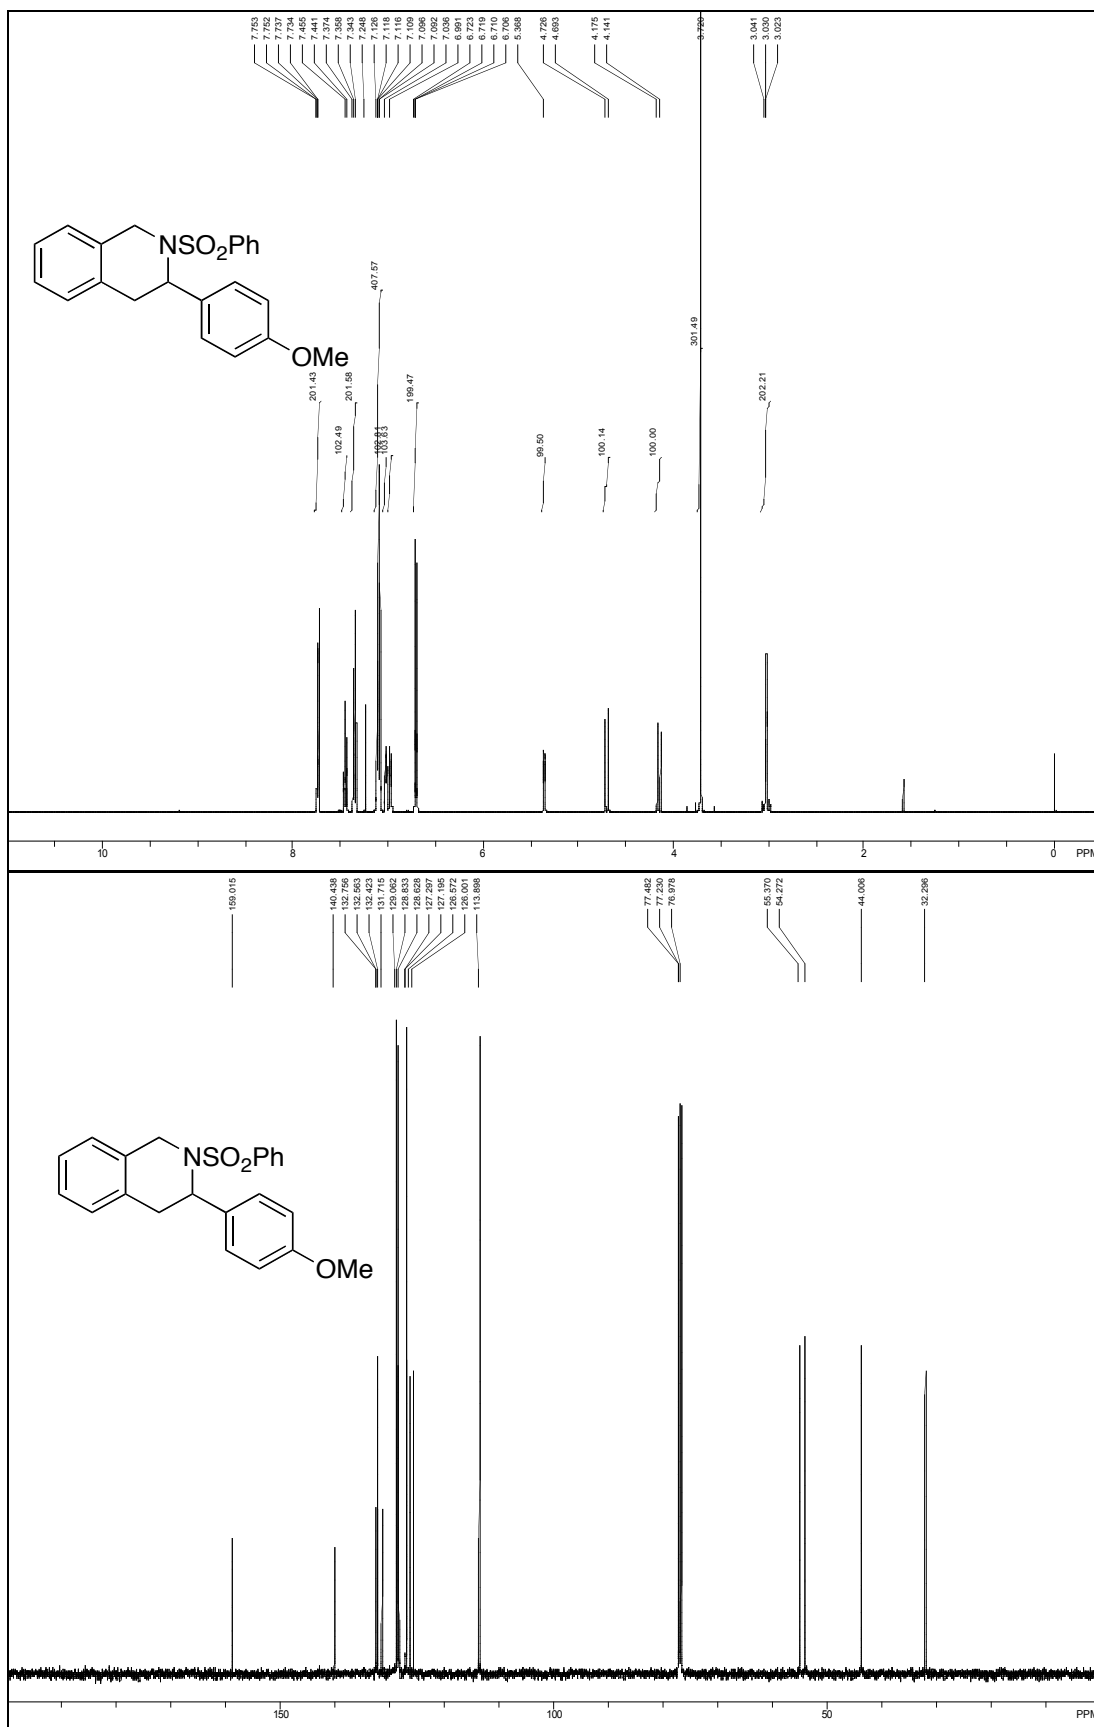

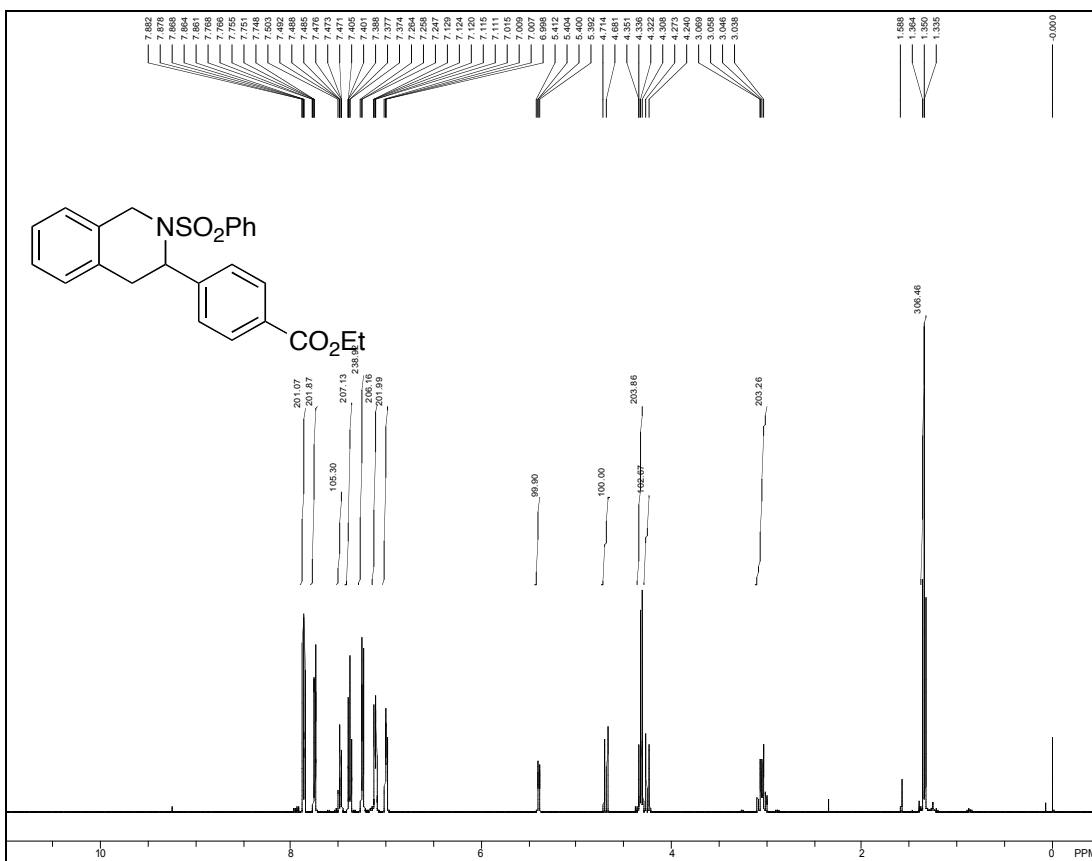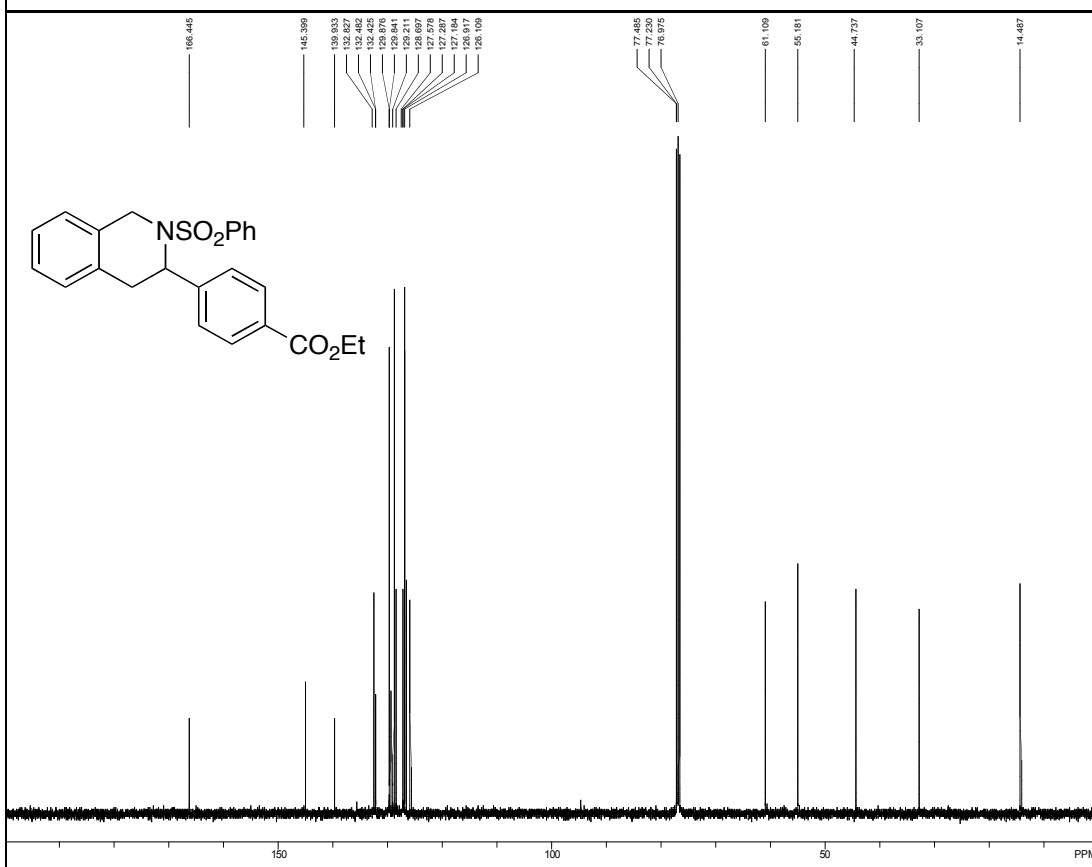

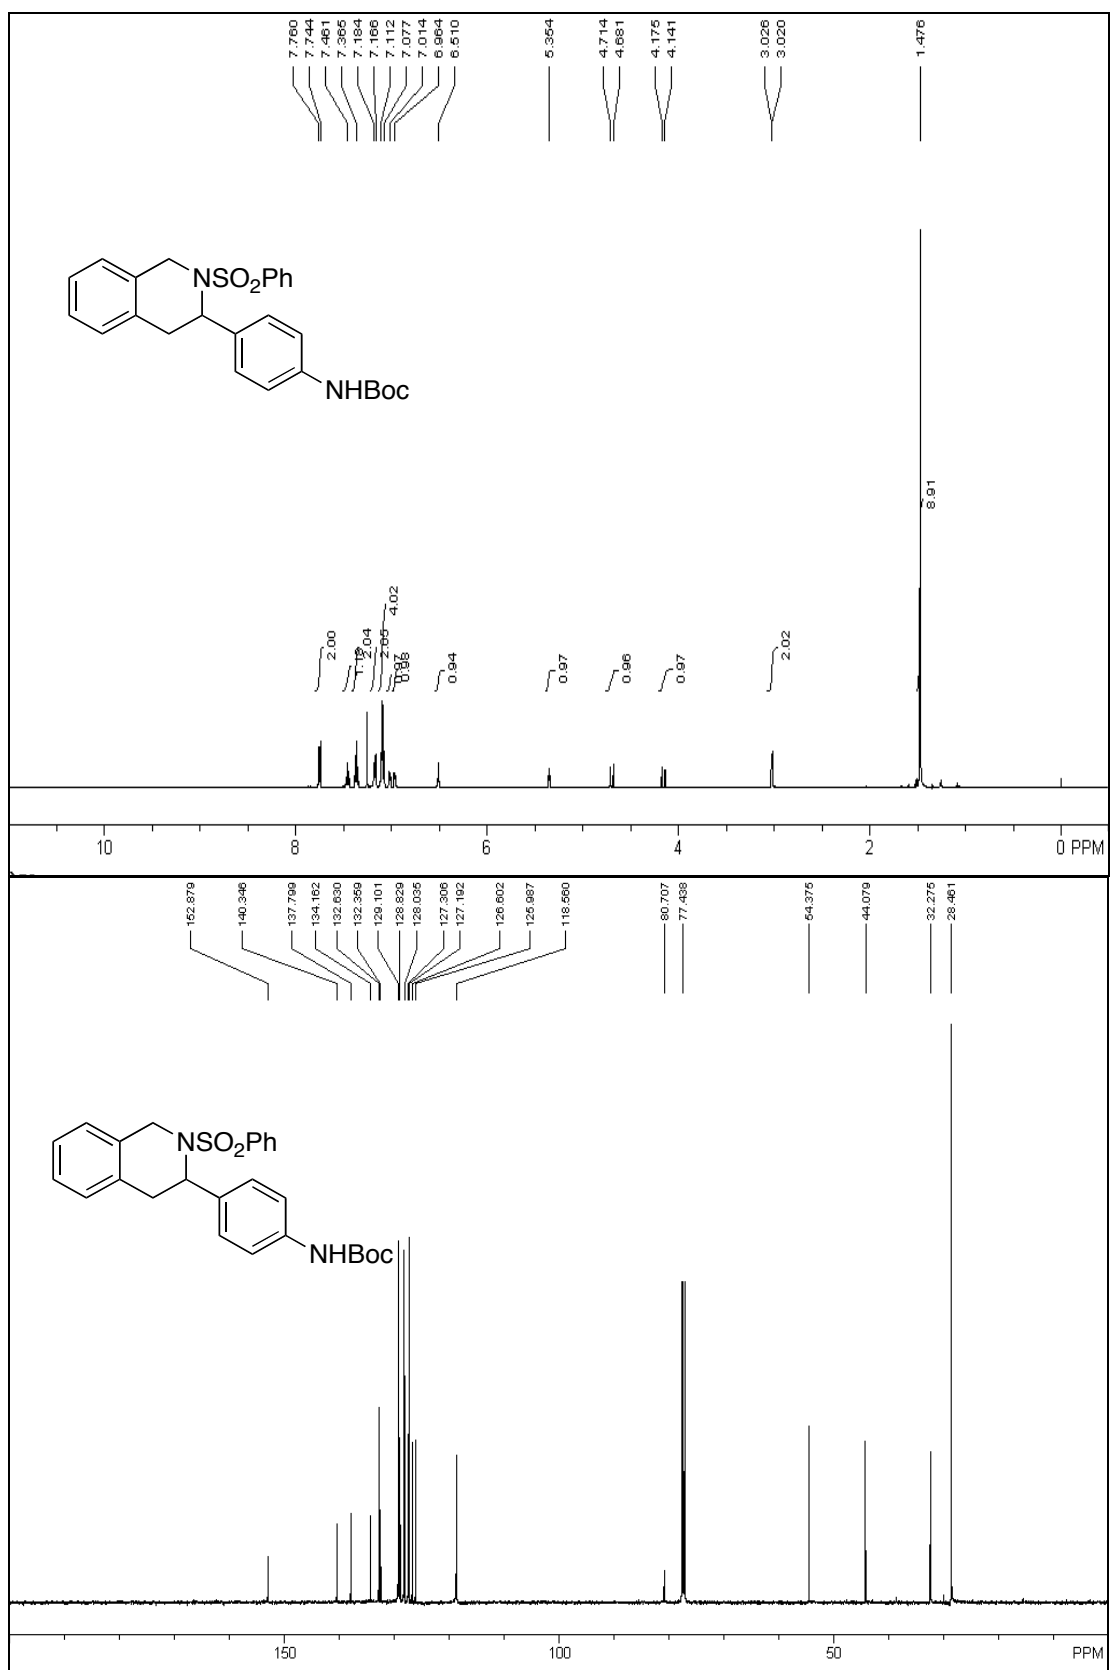

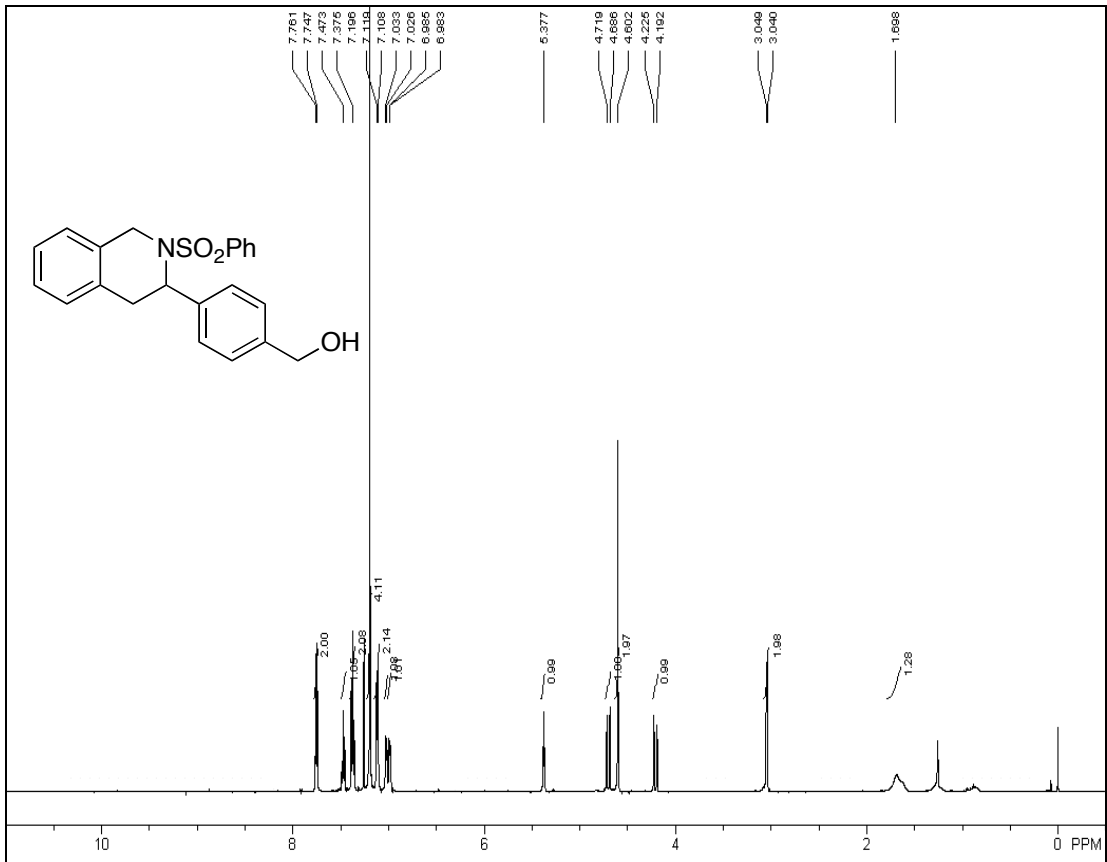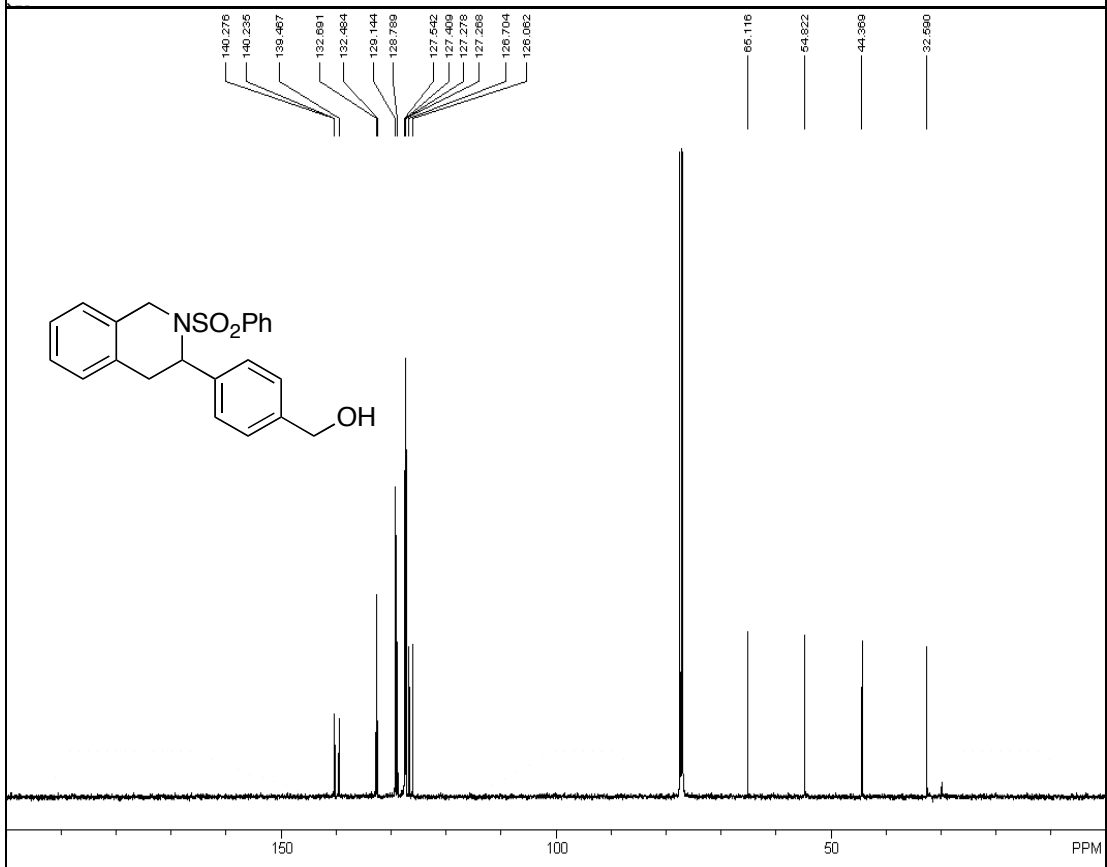

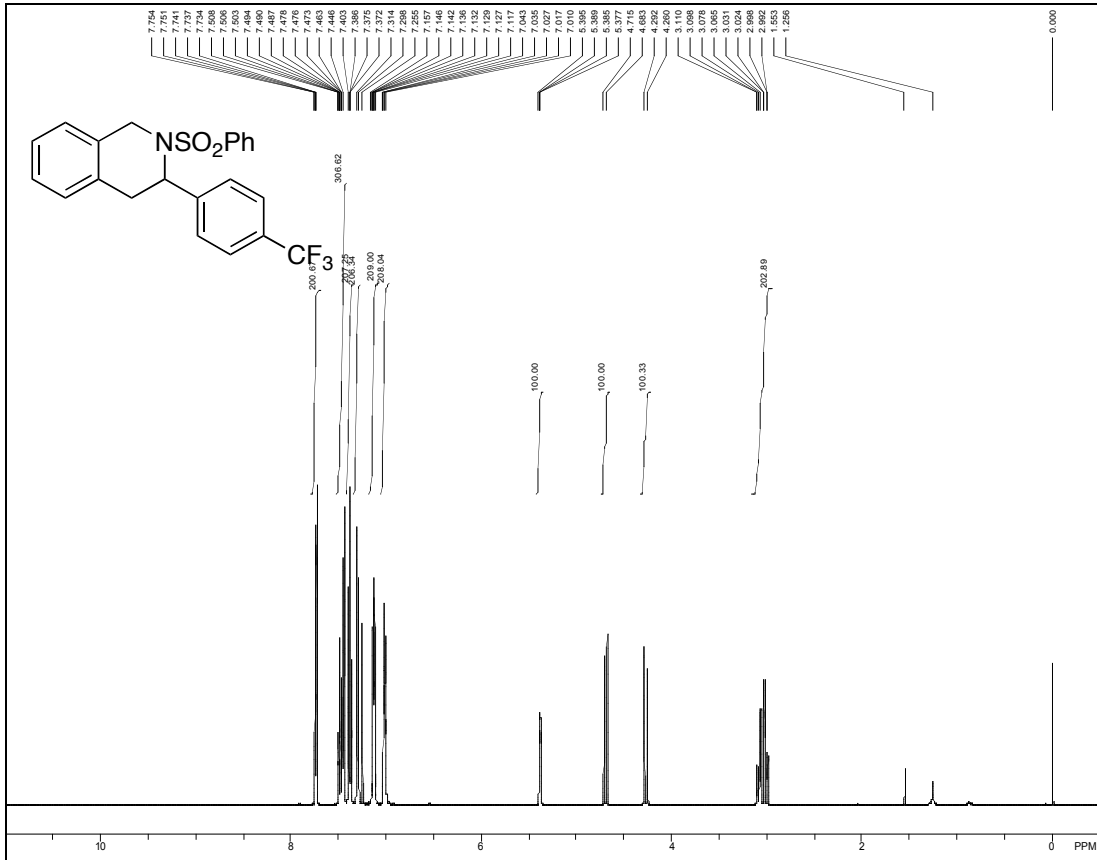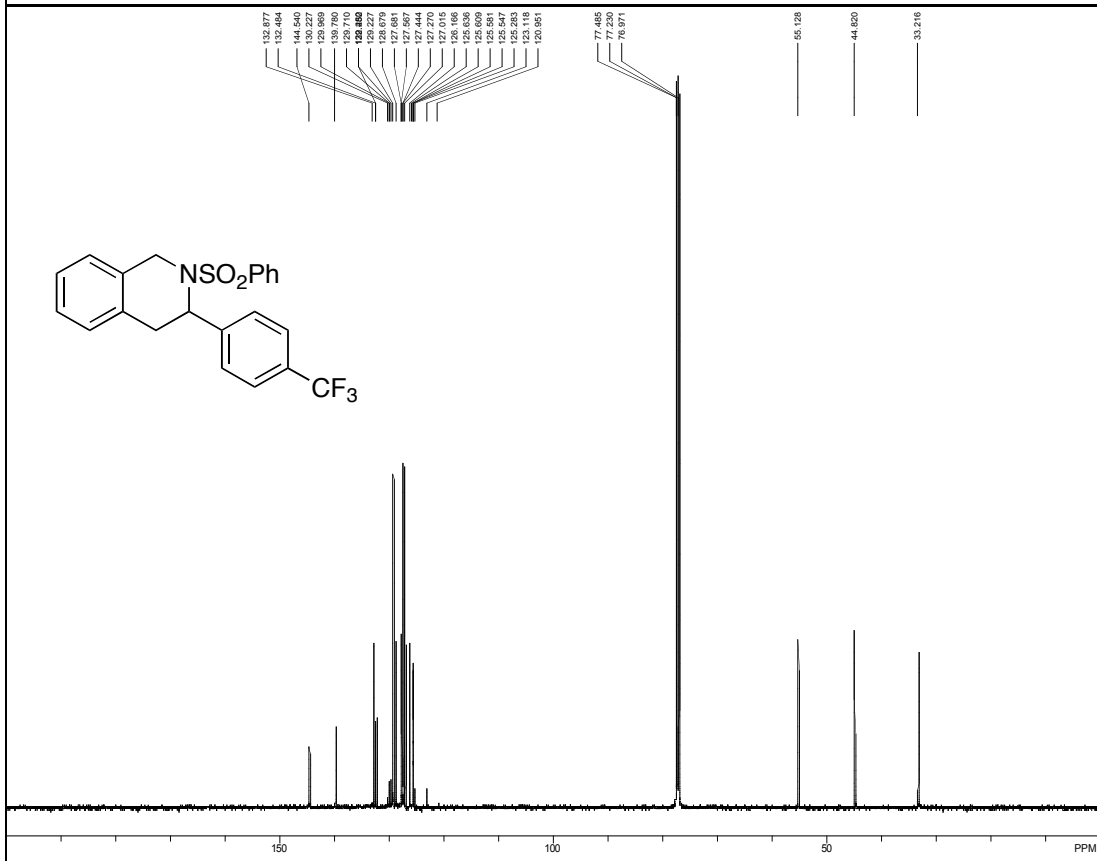

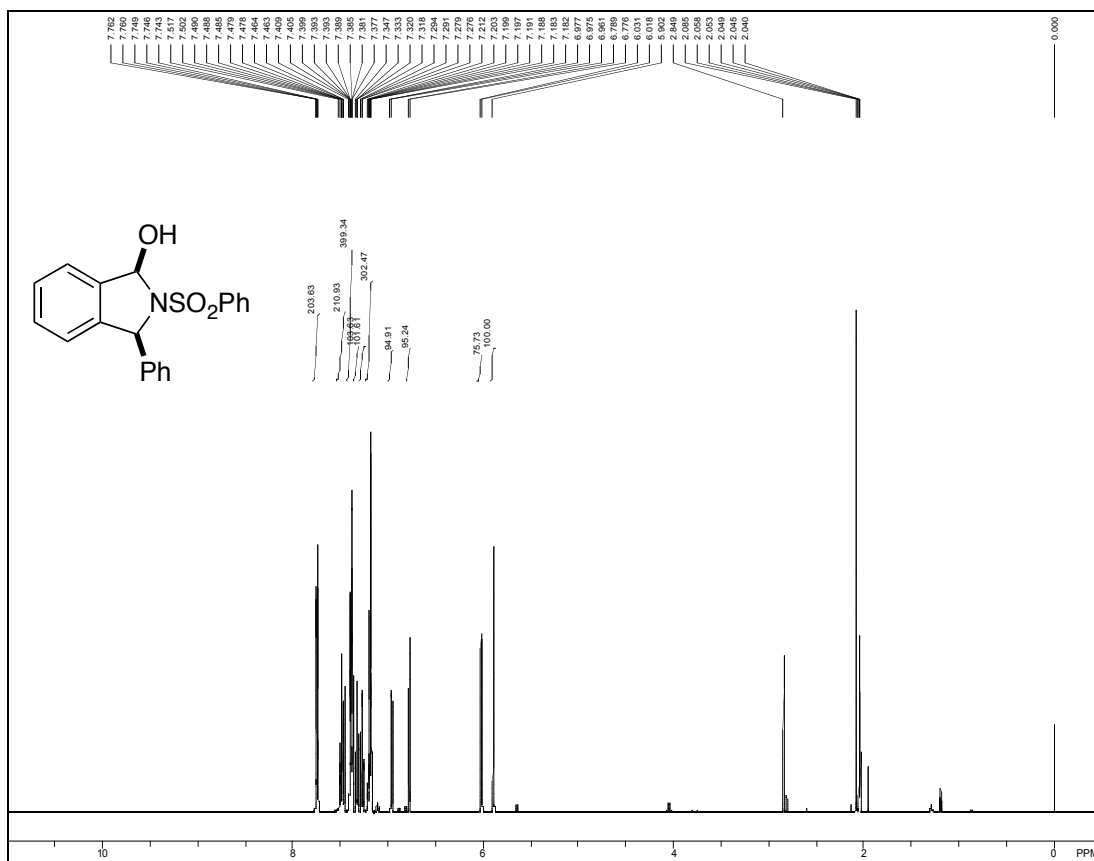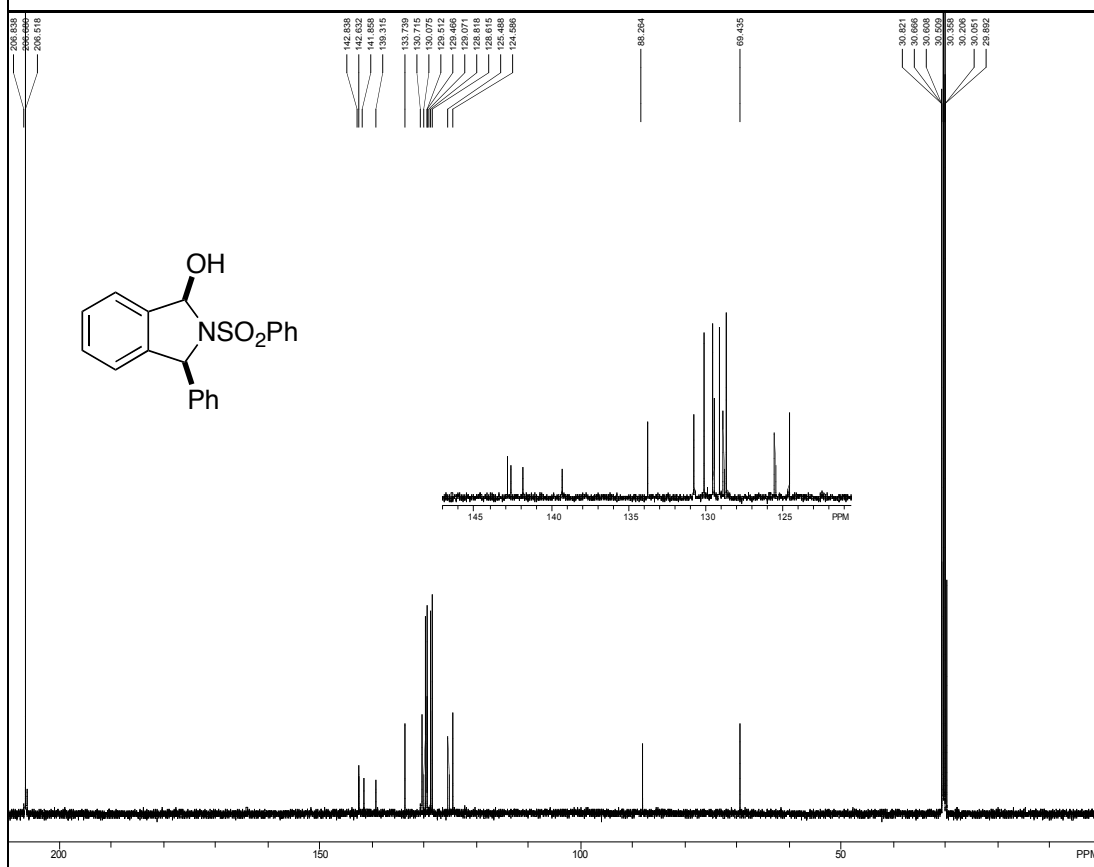

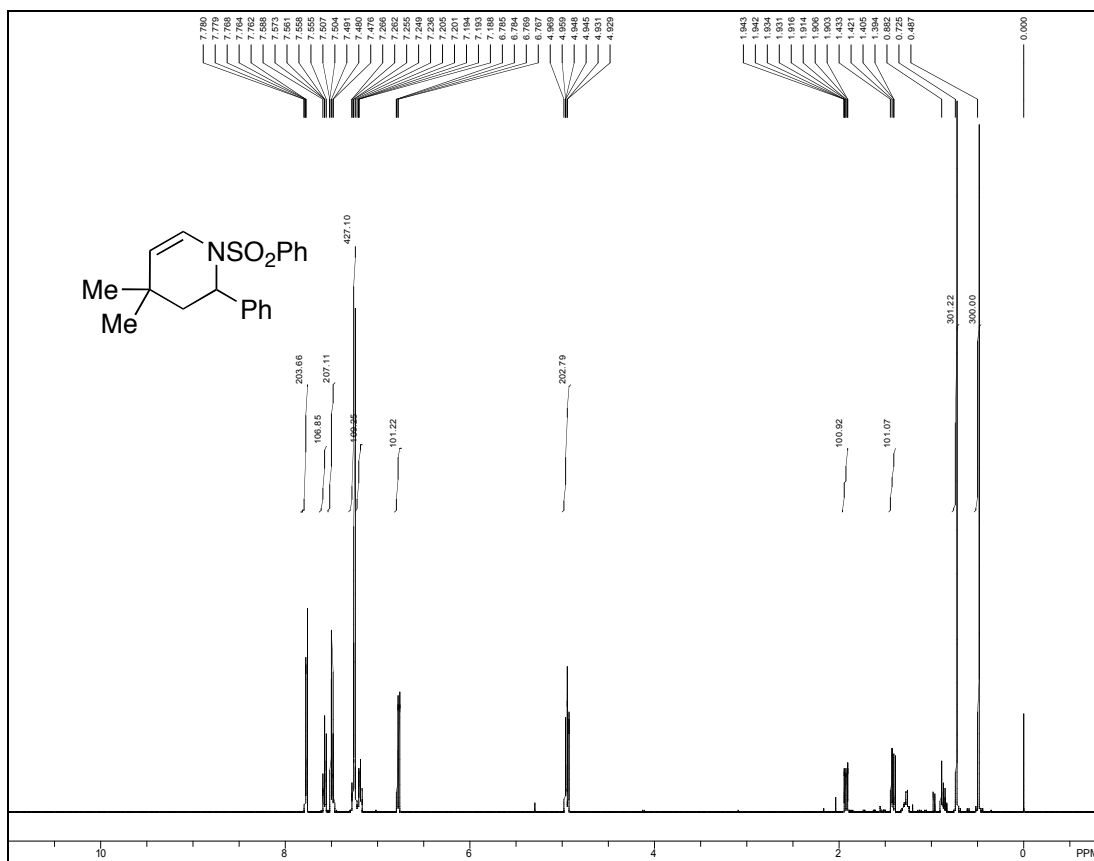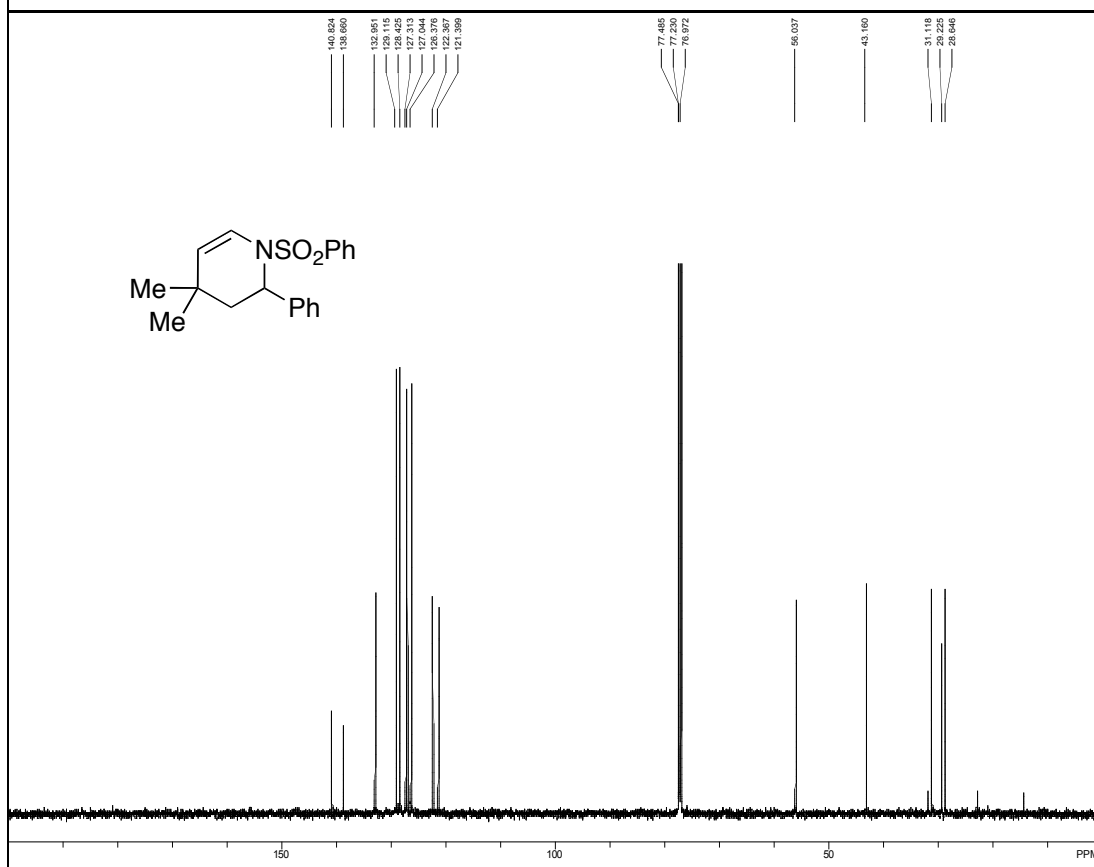

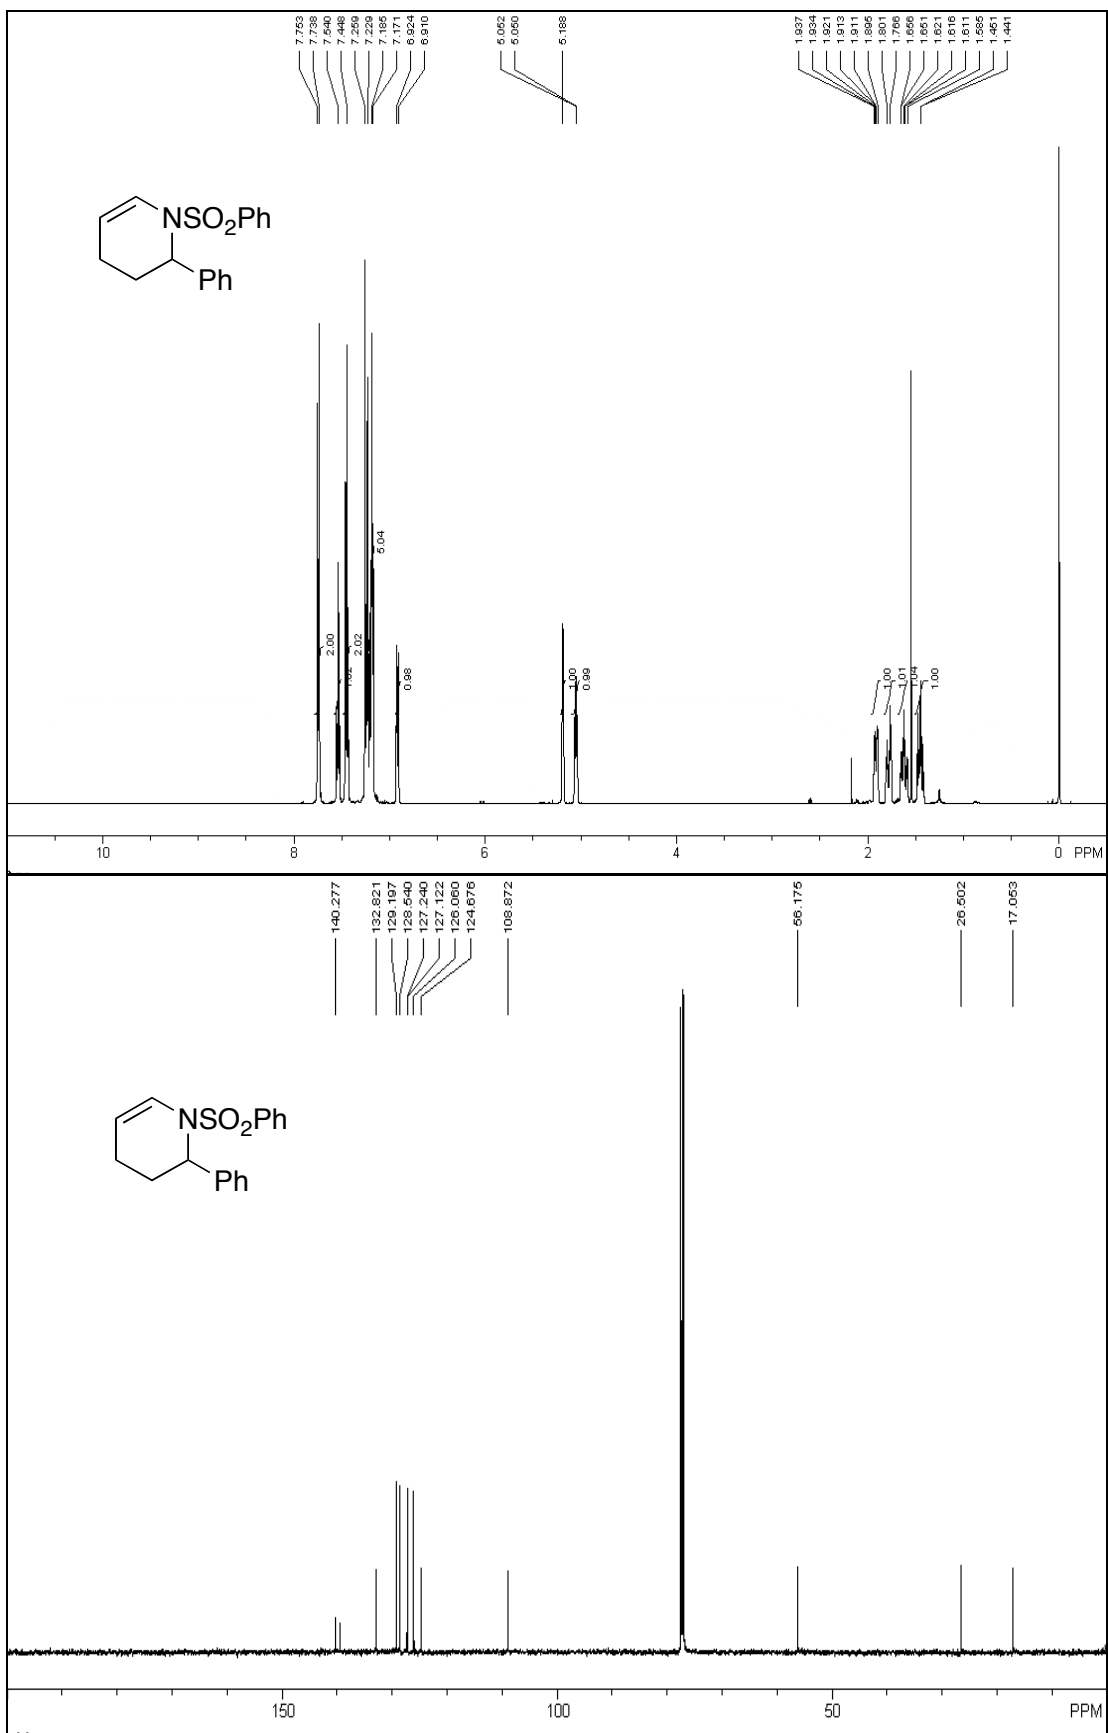



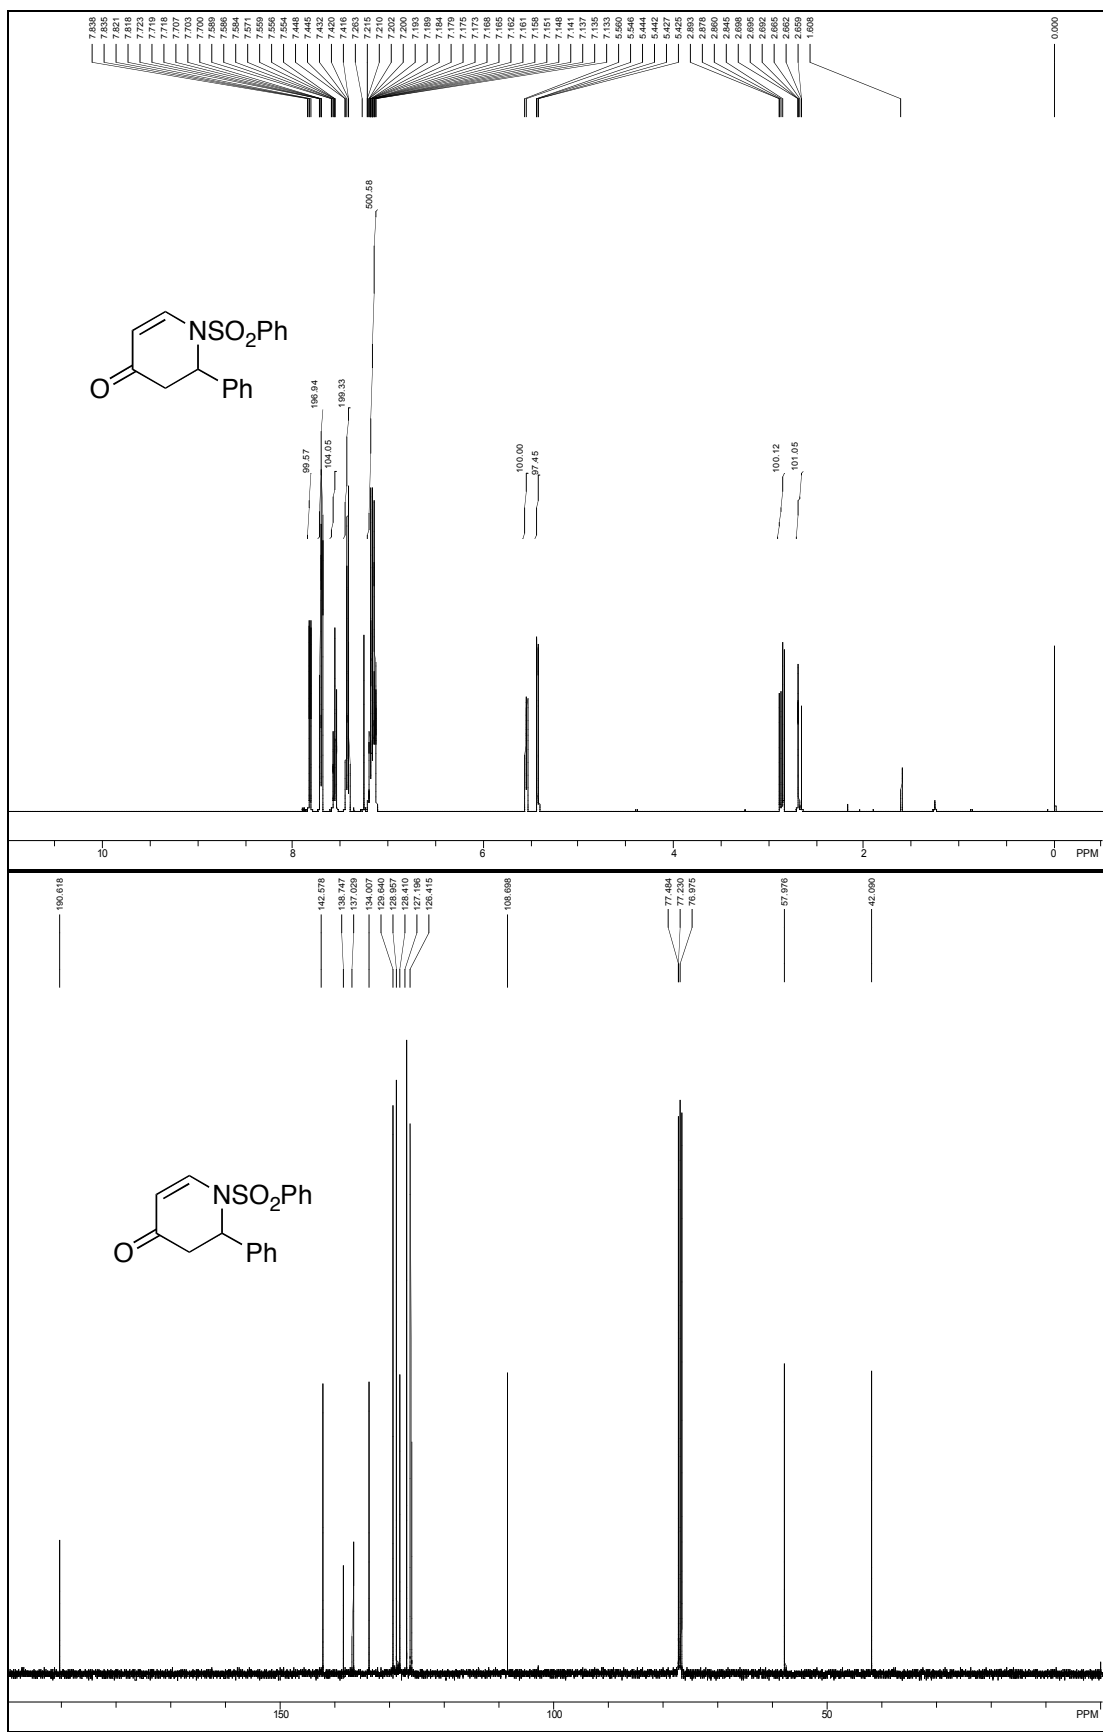

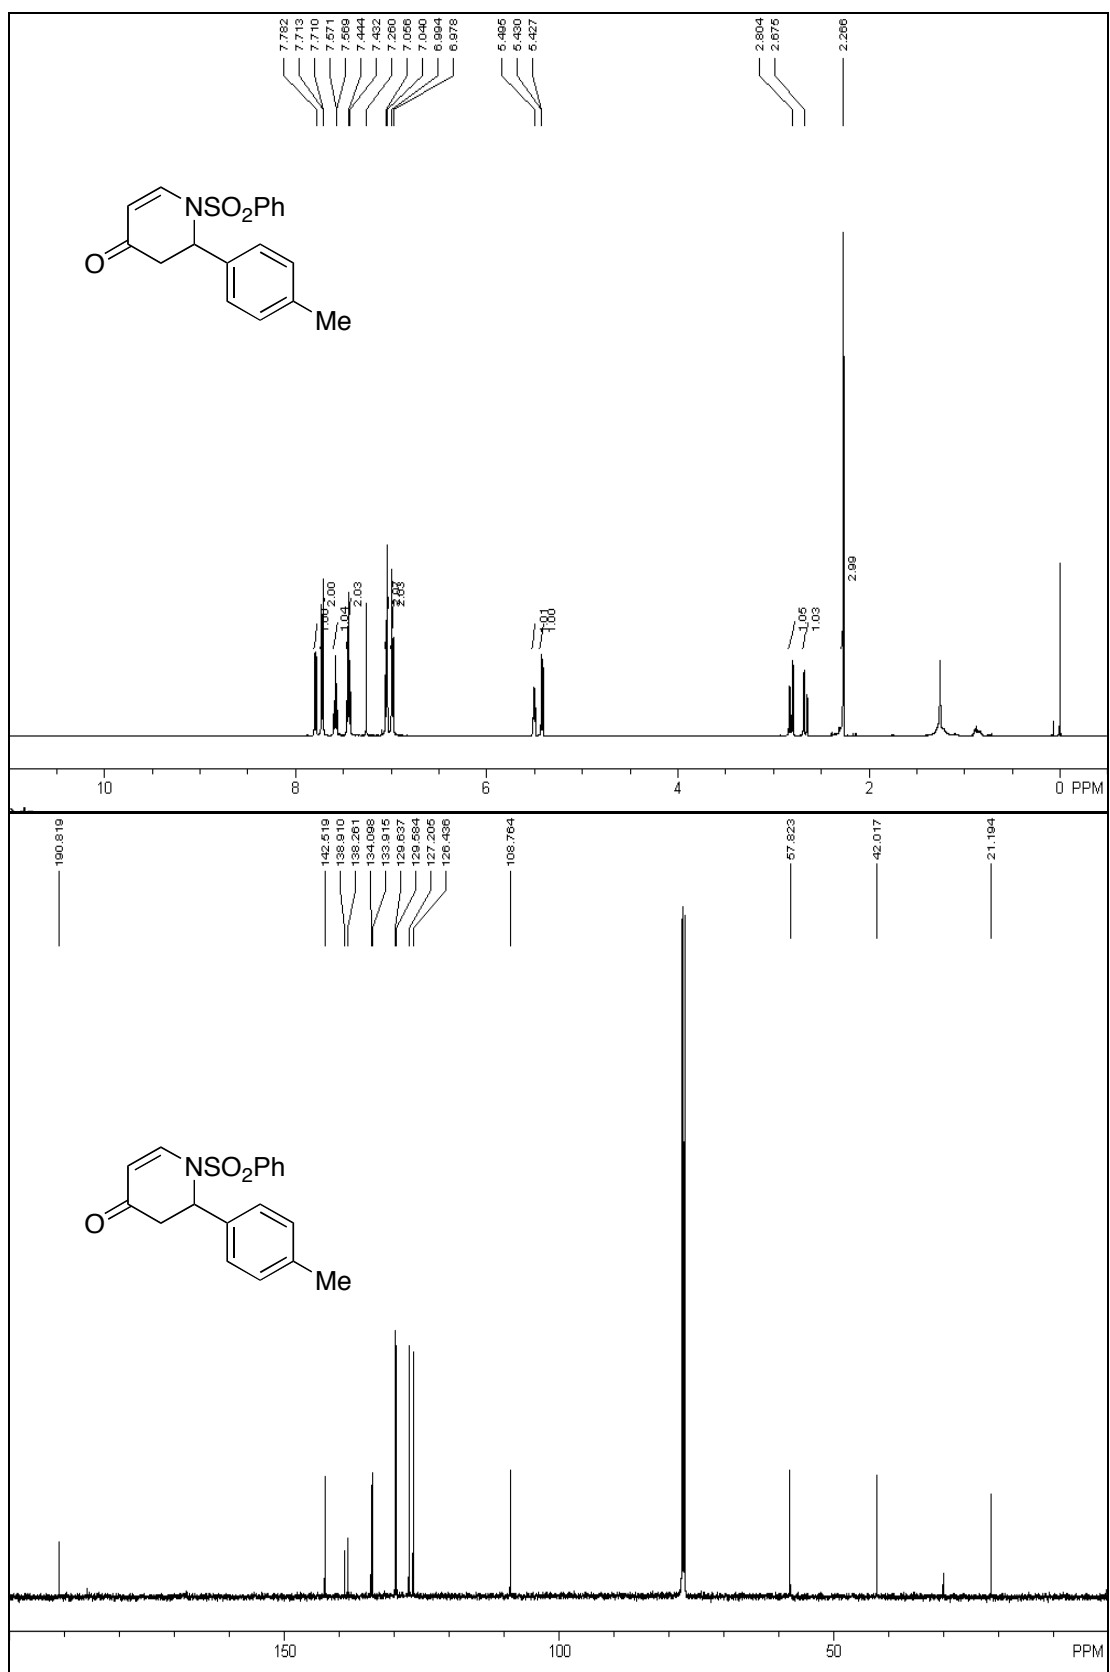

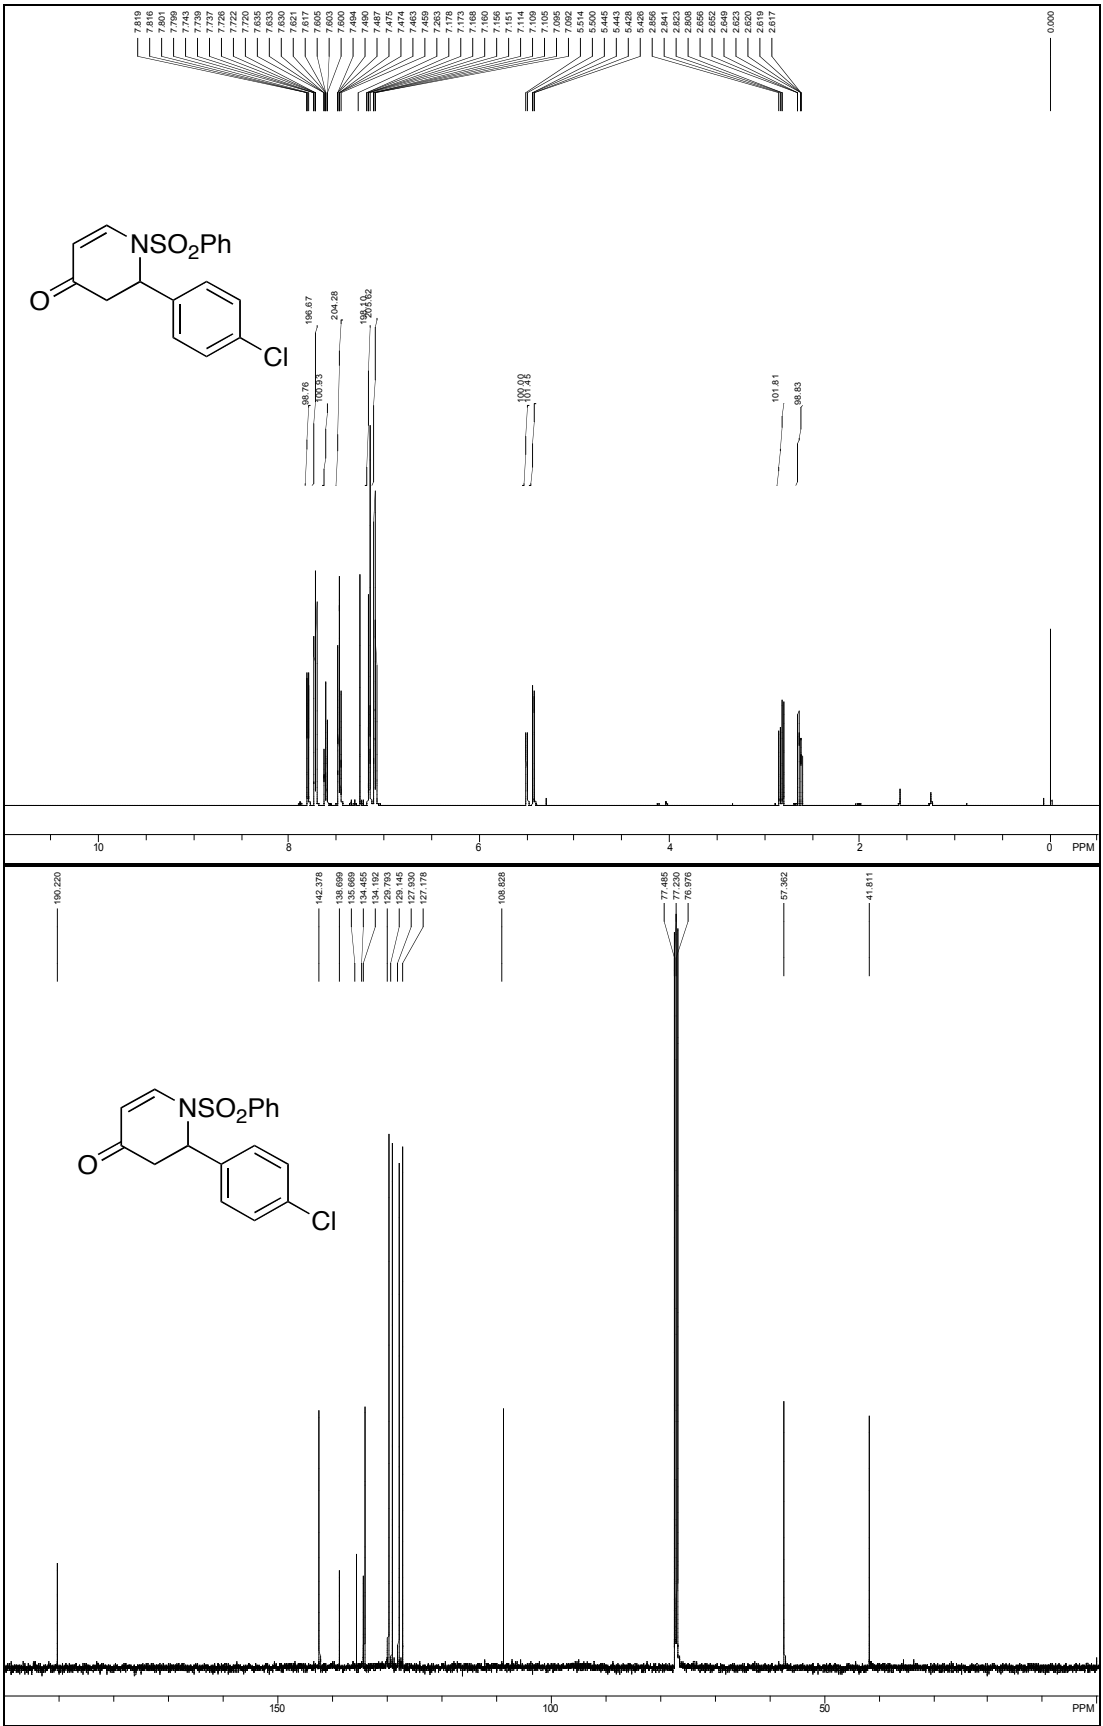

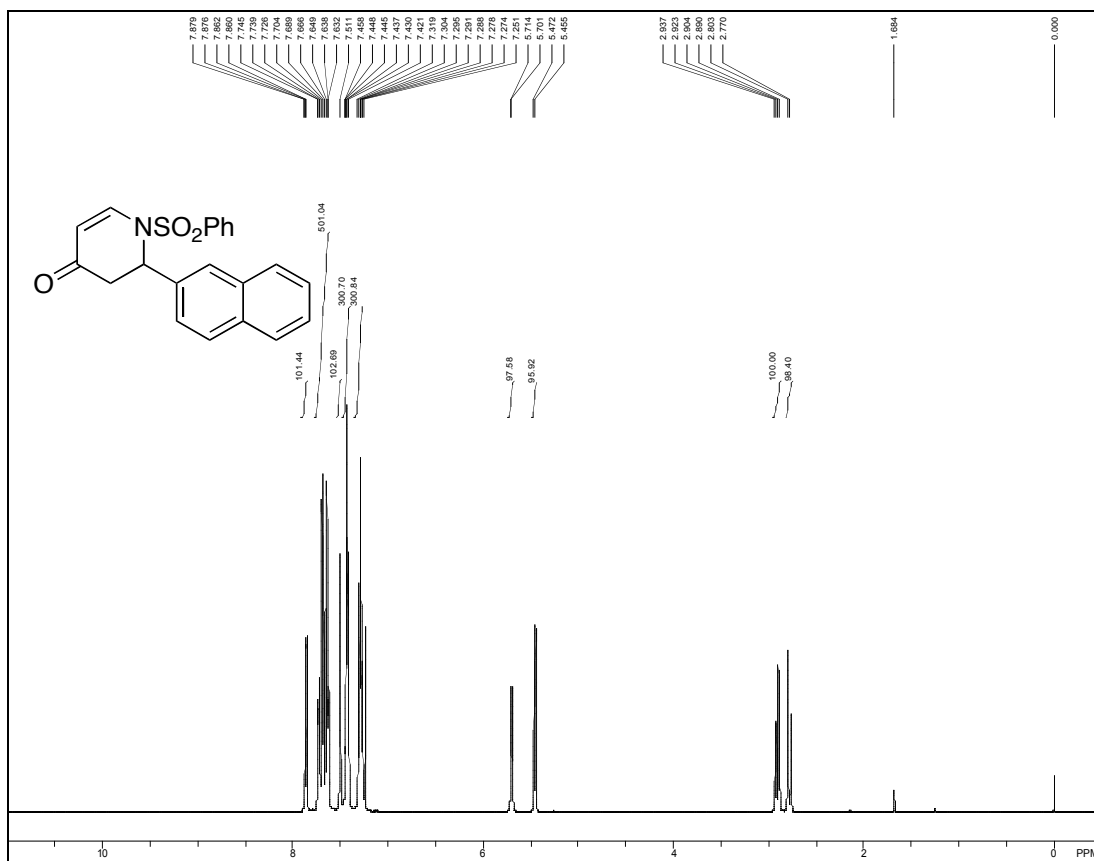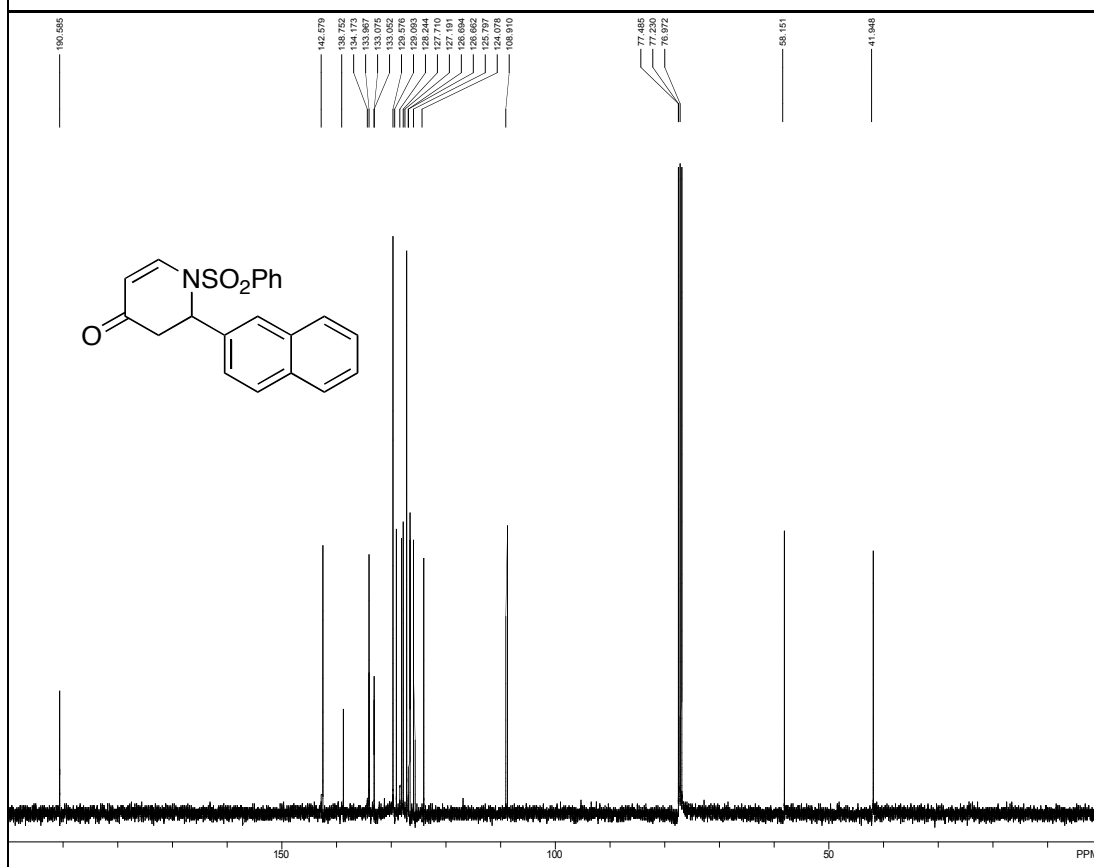

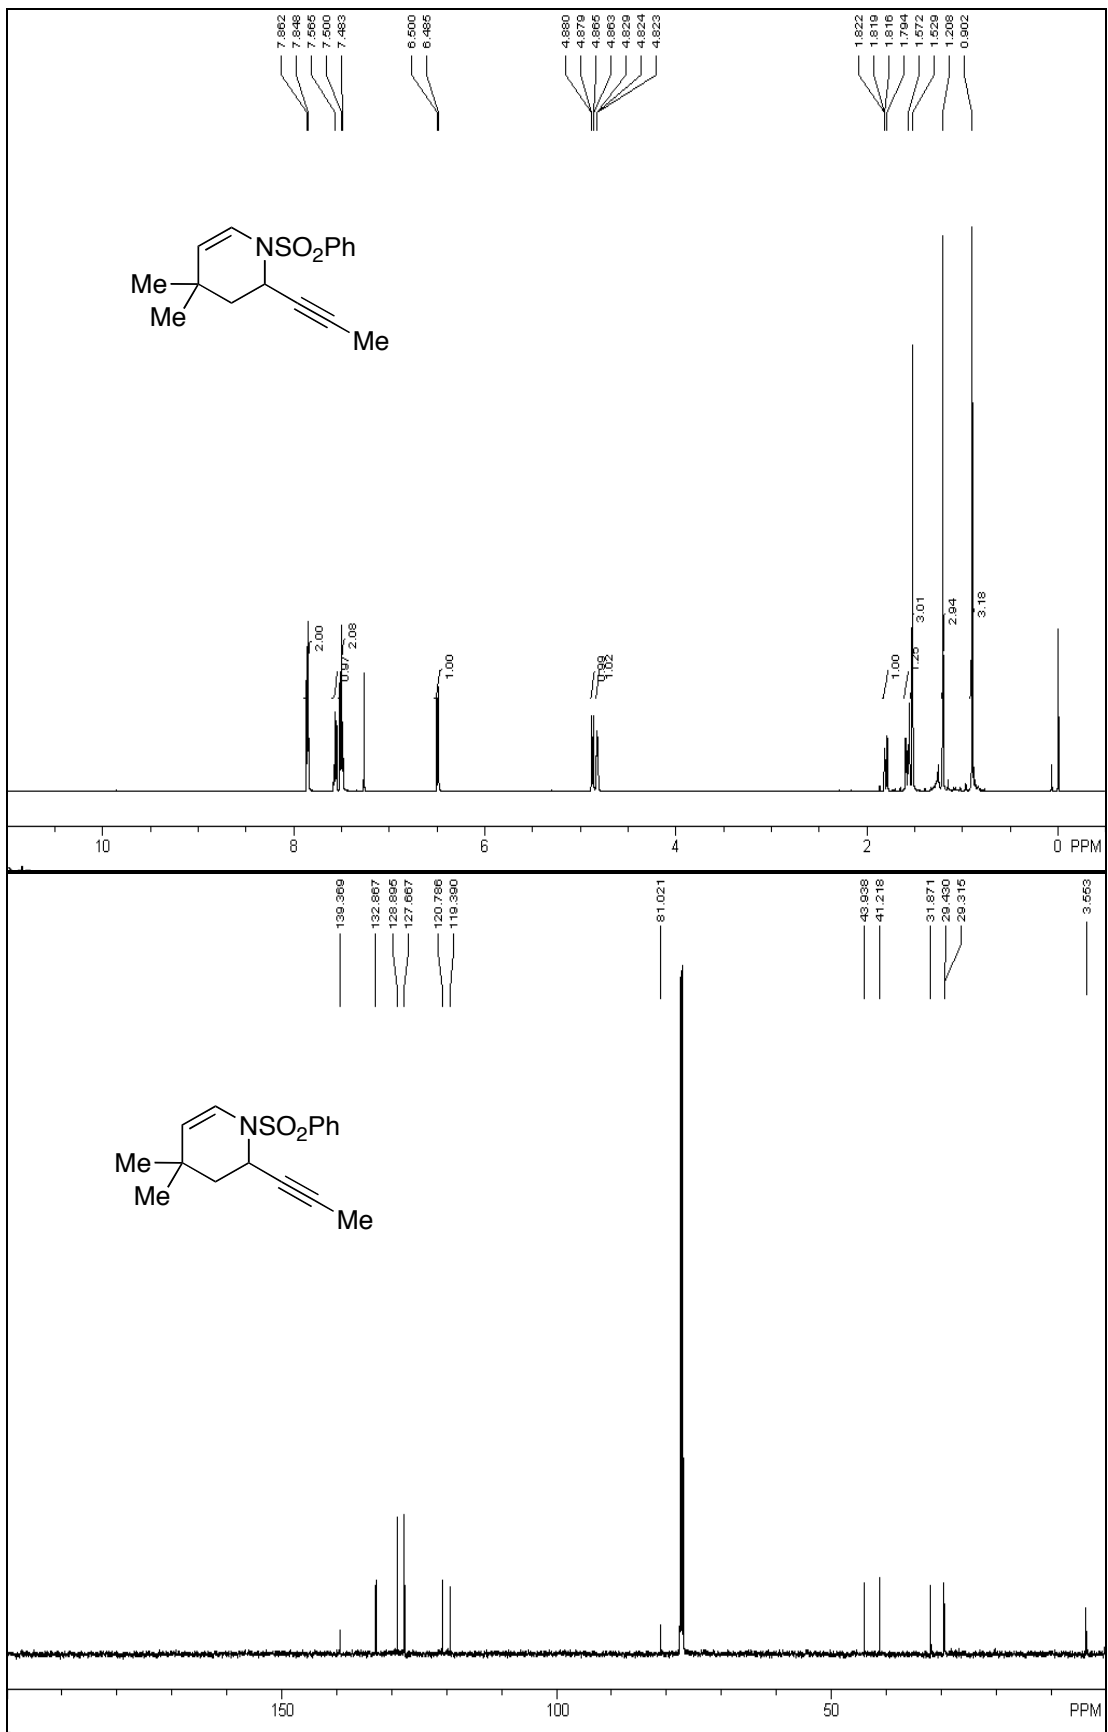

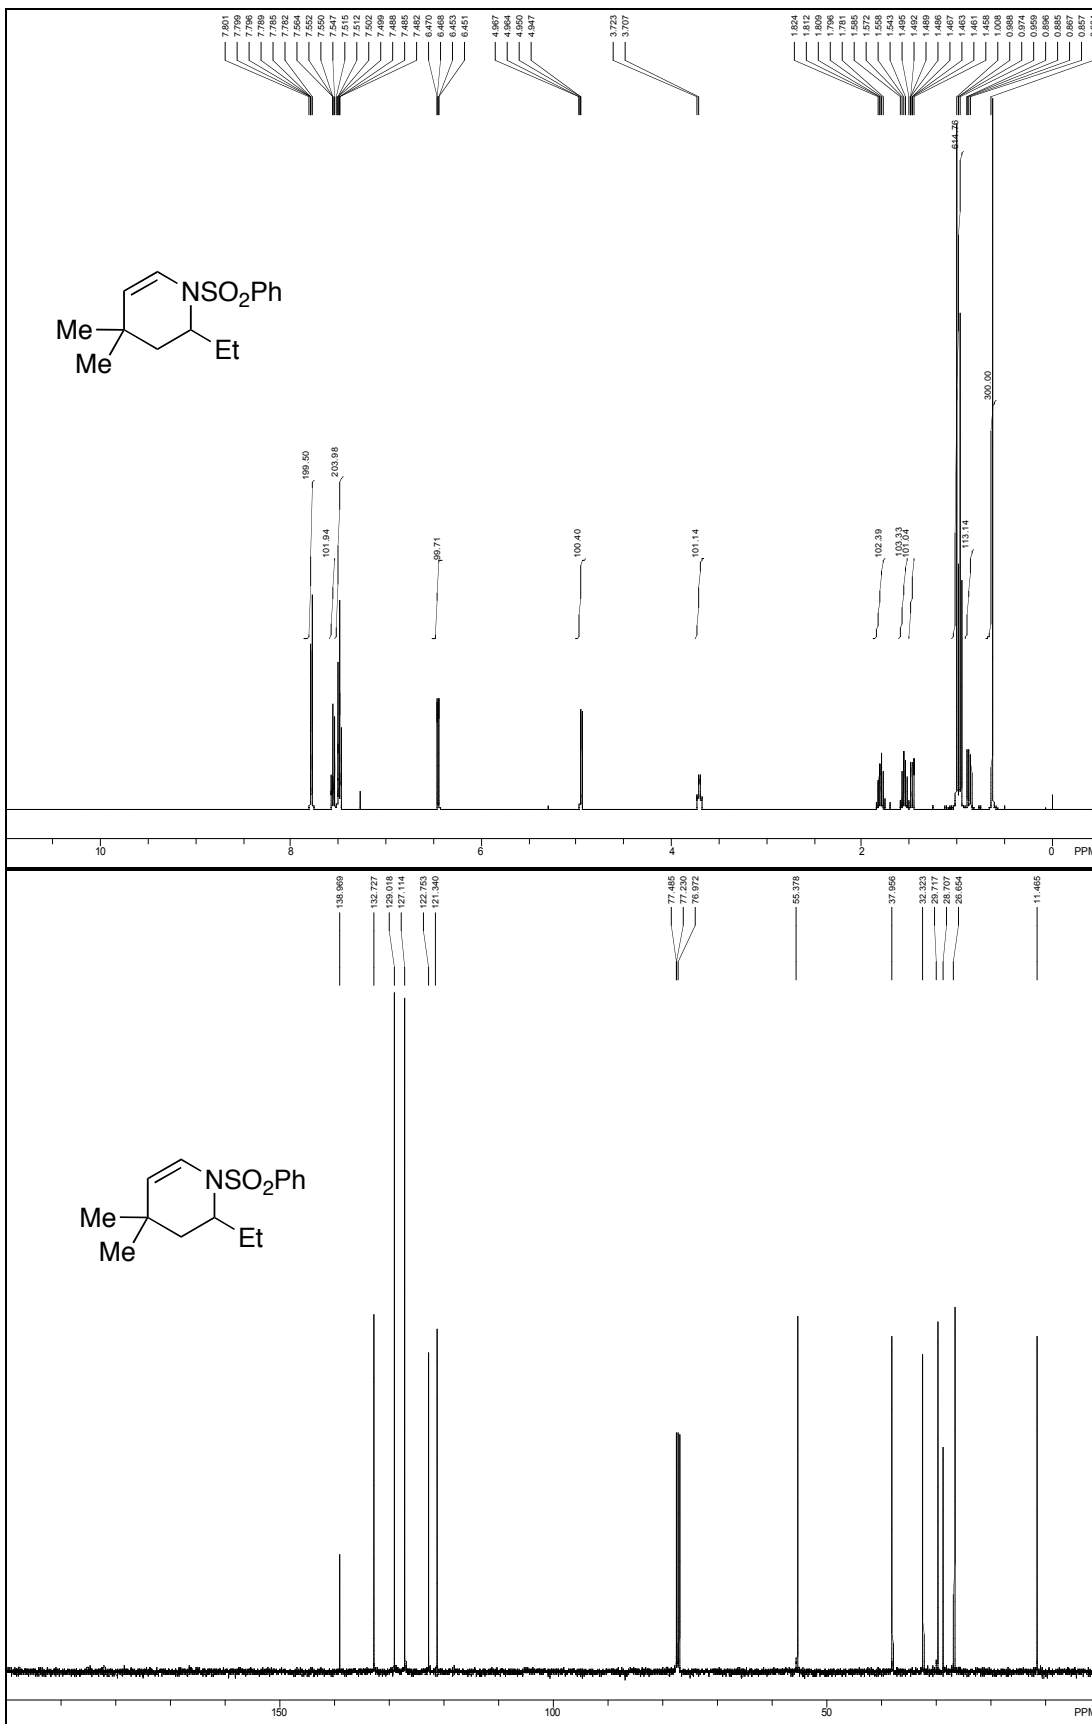

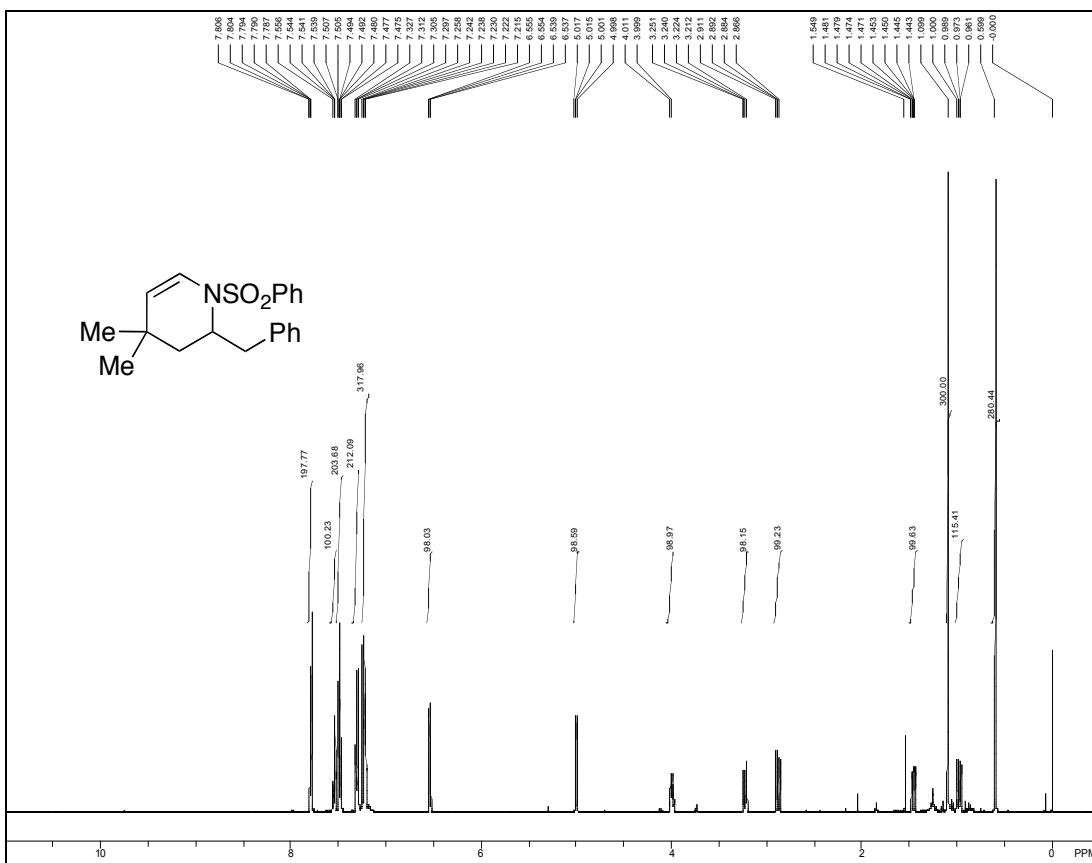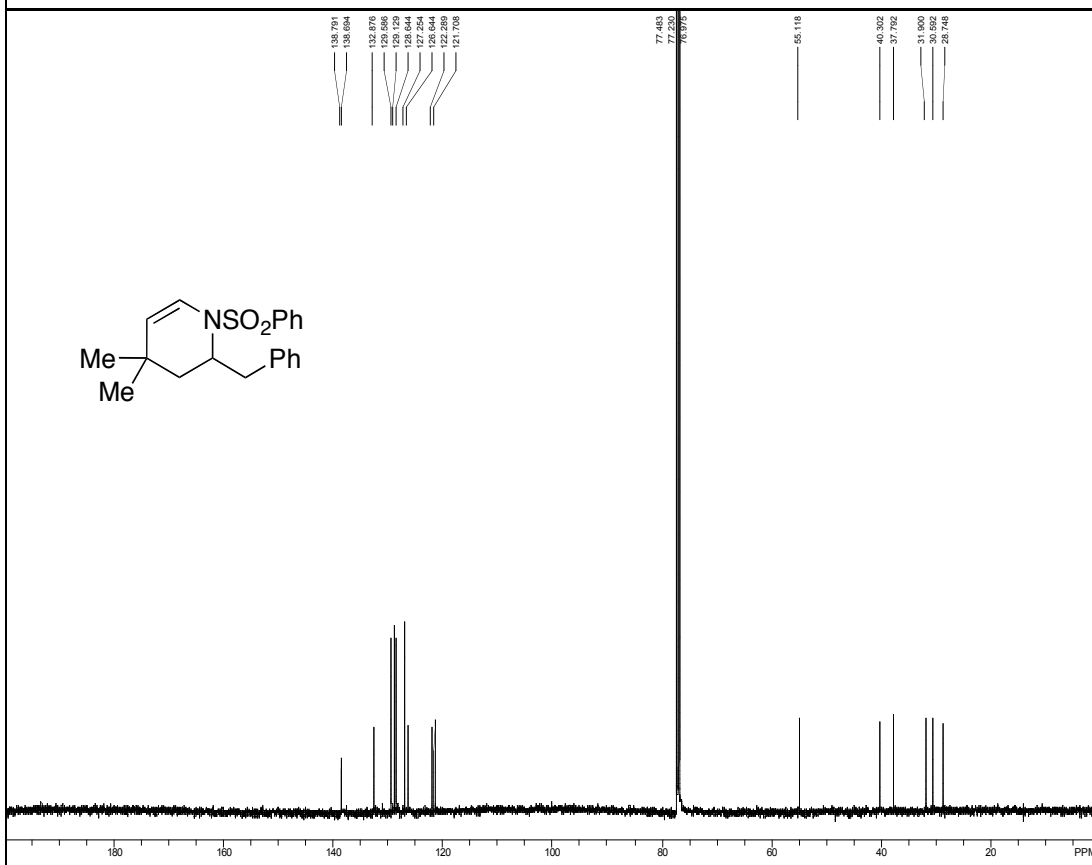

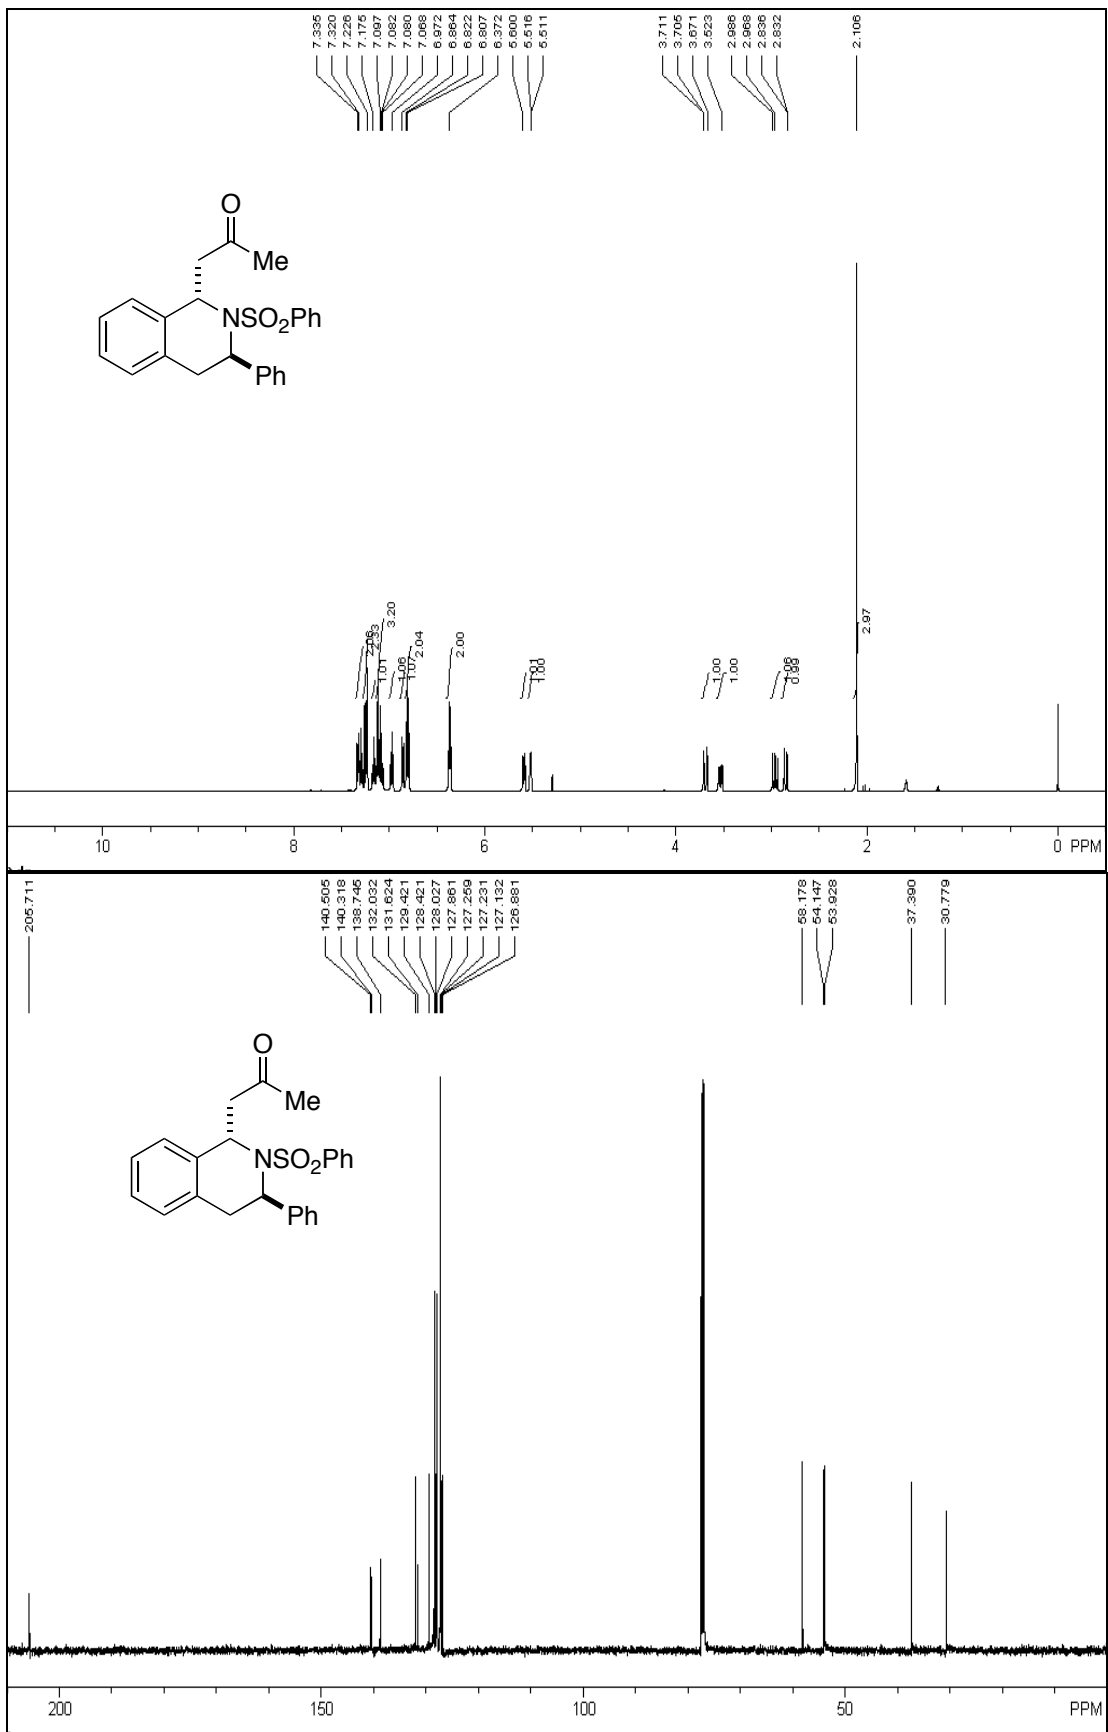



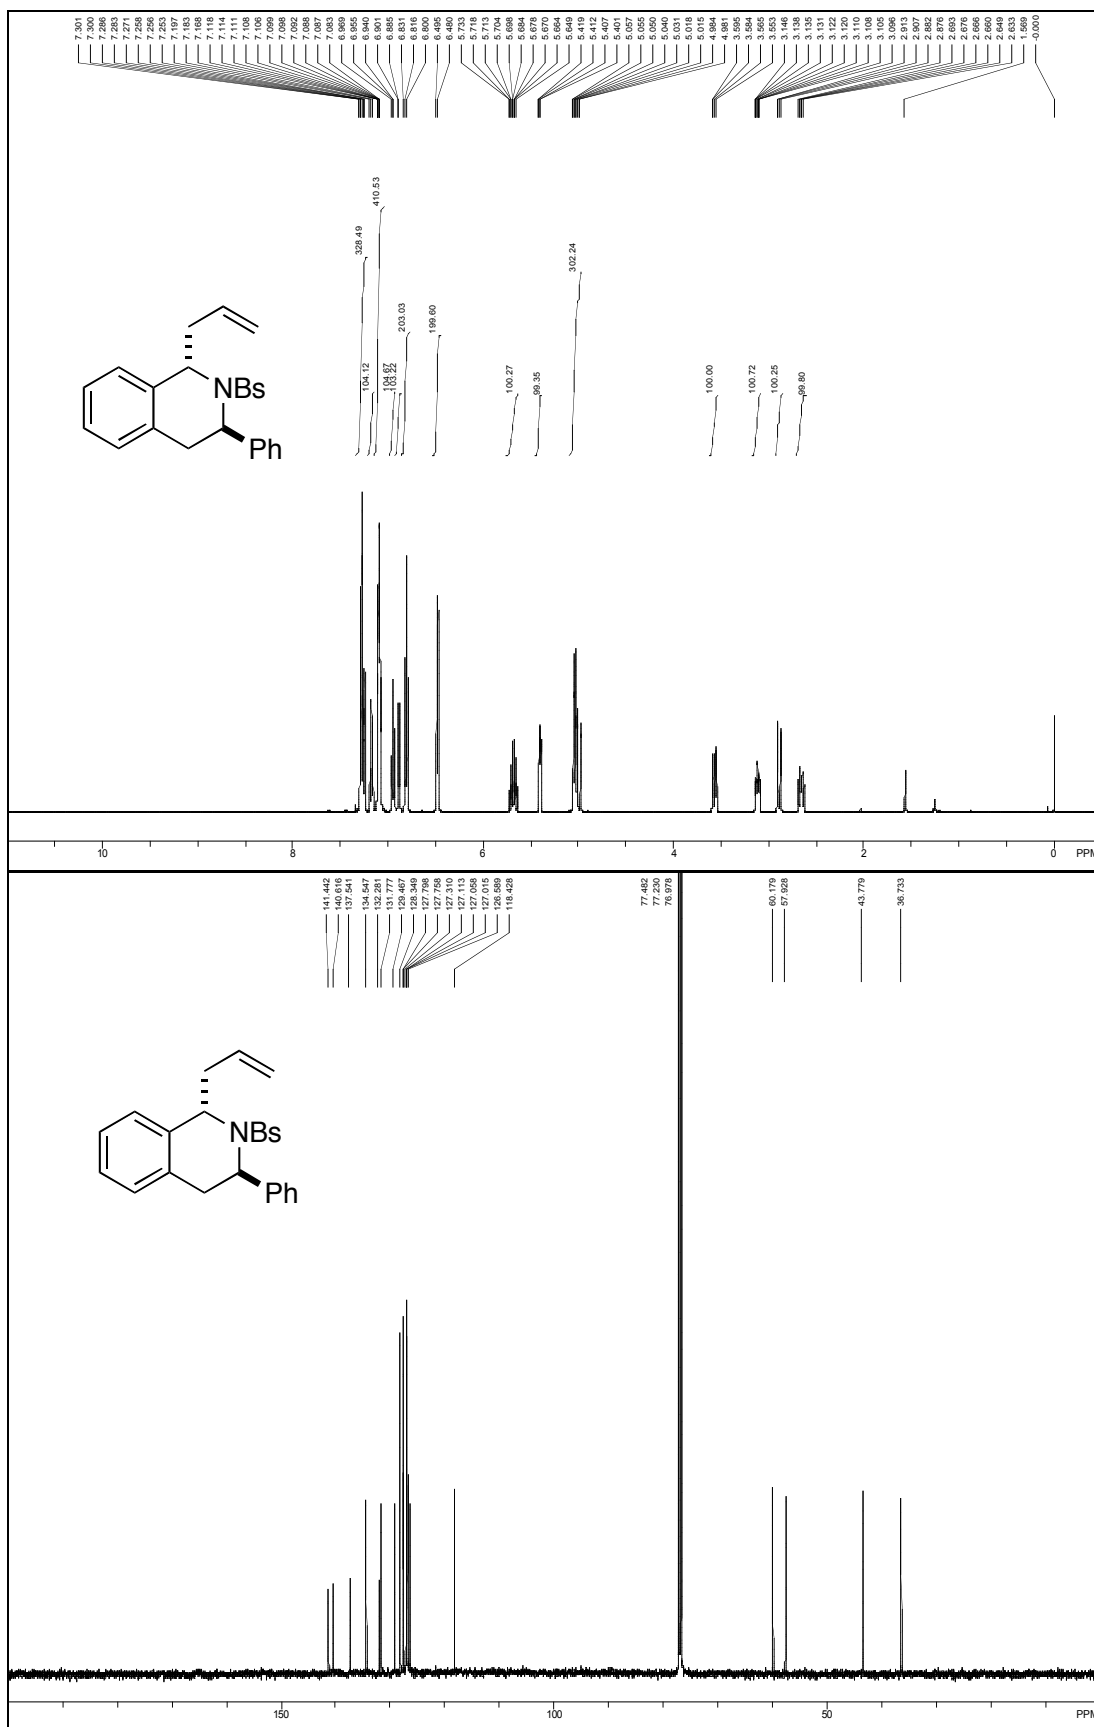

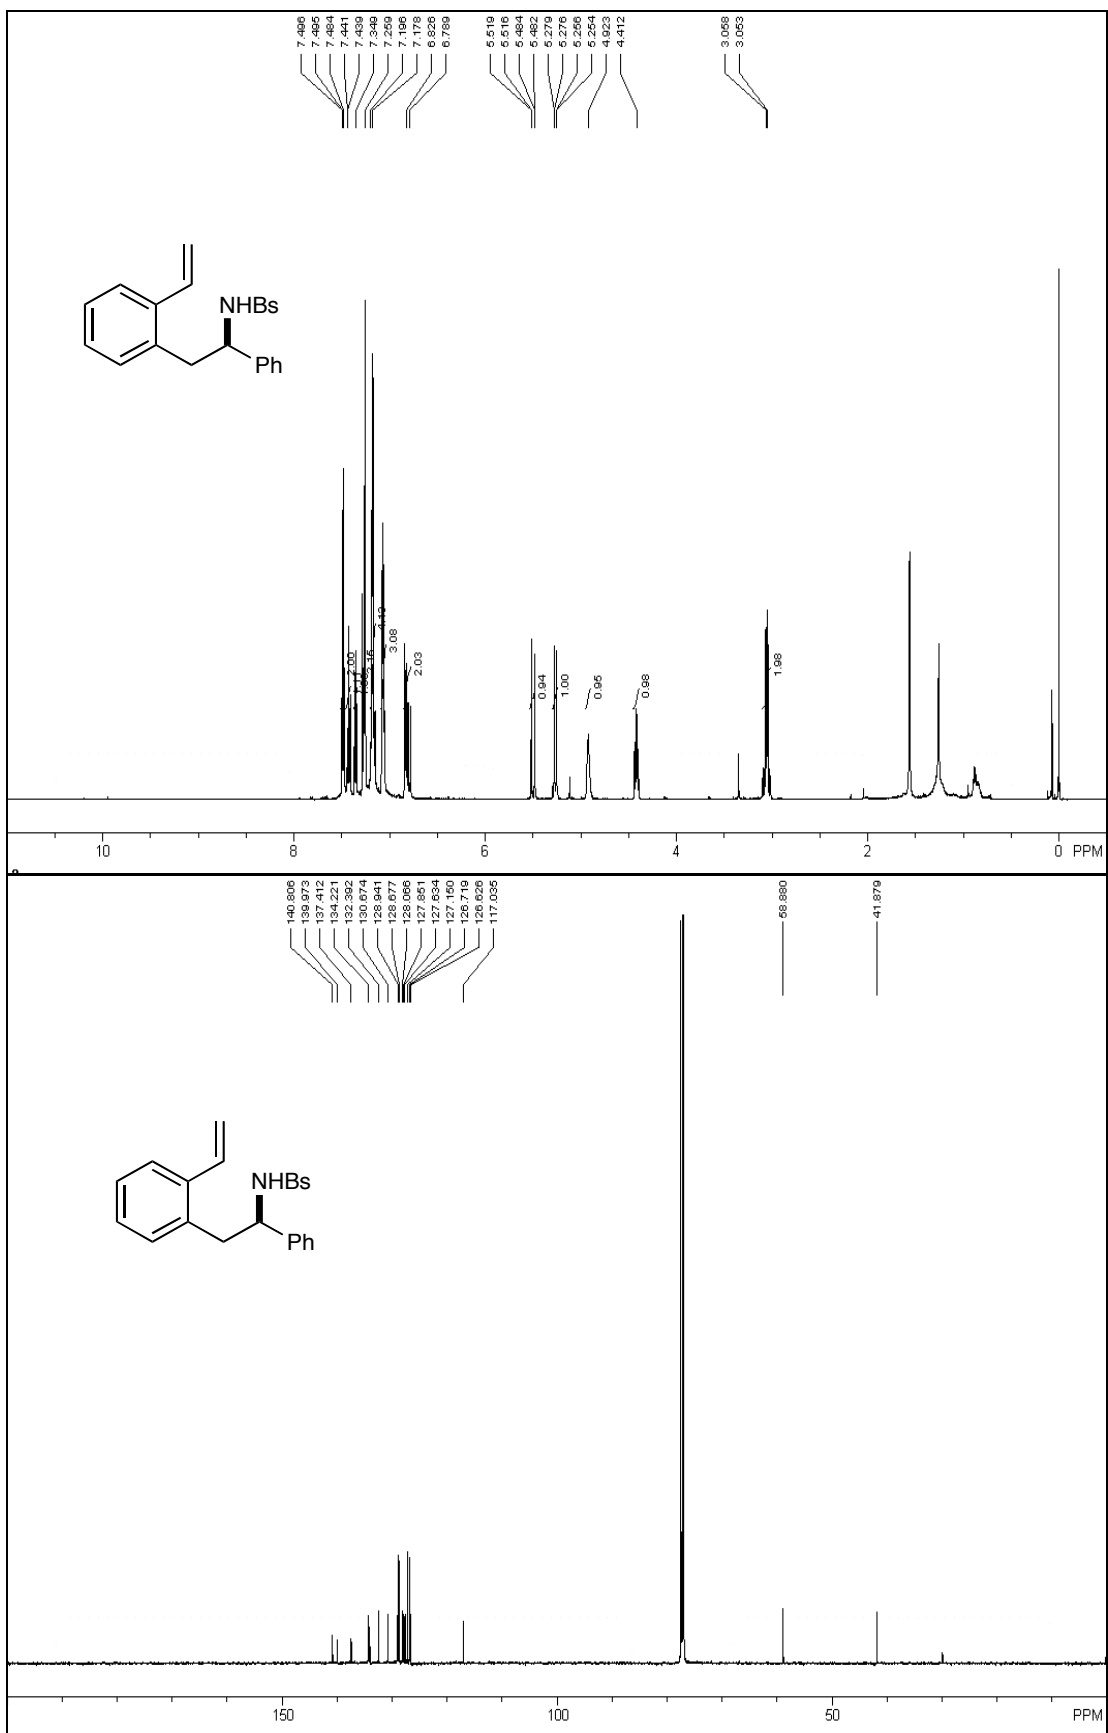

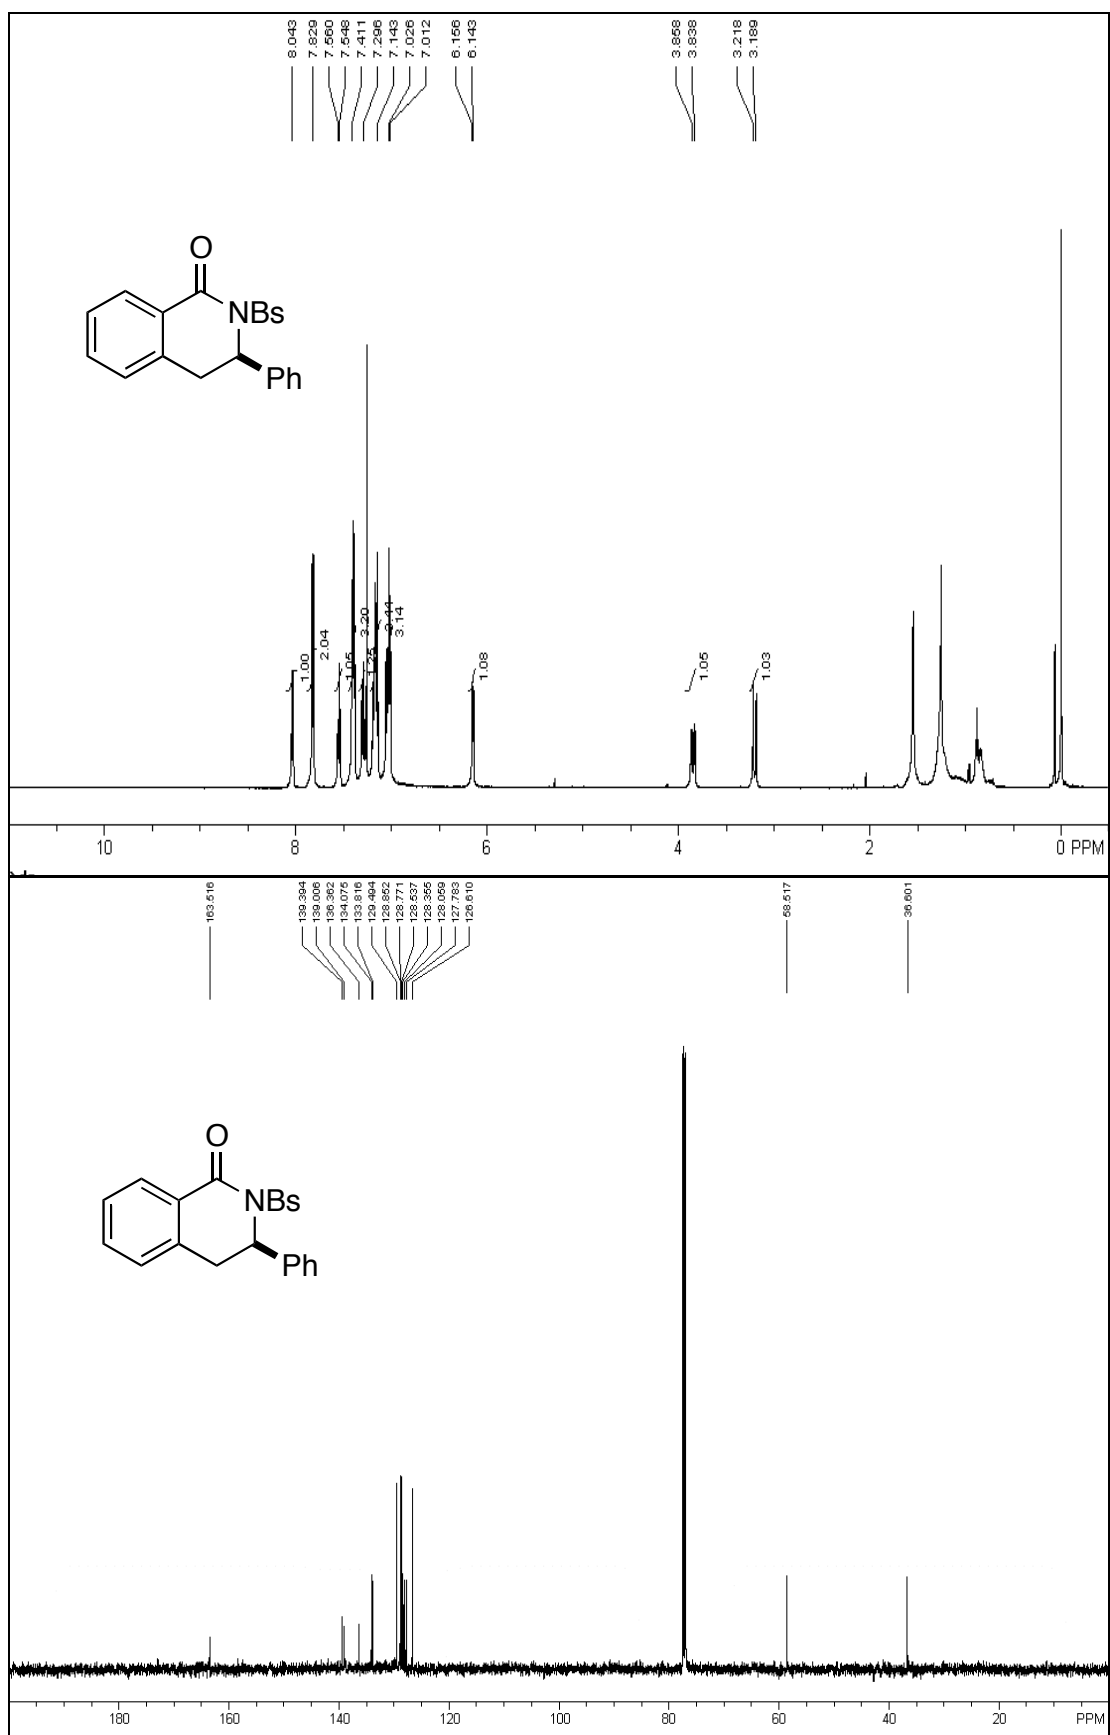

Supplement: NIHMS139608-supplement-2_si_002.pdf [file NIHMS139608-supplement-2_si_002.pdf]
